# Supplementary material
Source: publisher figshare collection journal article supplement (https://microbiology.figshare.com/ndownloader/files/16376135)
Supplement: Supplementary file 1 [file 16376135]

## Sheet: E. ictaluri 93-146 virulence f.
Genomic islands
IDENTIFIED GENOMIC ISLANDS GENES	IDENTIFIED GENOMICS ISLANDS GENES SEARCHED AGAINST MVIRDB(VIRULENCE DATABASE)
	Number of hits	Lowest E-value	Description (E-value)
|WP_015871545.1|locus|NT01EI_RS09775|prediction_method|Predicted_by_at_least_one_method(IslandPath-DIMOB,Islander)	7	0	putative phage replication protein [Escherichia coli O157:H7 str. Sakai]
|WP_015872226.1|locus|NT01EI_RS13015|prediction_method|Predicted_by_at_least_one_method(IslandPath-DIMOB)	9	0	Z1203 protein [Escherichia coli]
|WP_015872356.1|locus|NT01EI_RS13600|prediction_method|Predicted_by_at_least_one_method(IslandPath-DIMOB)	12	0	terminase-like protein [Enterobacteria phage Fels-2]
|WP_015872375.1|locus|NT01EI_RS13695|prediction_method|Predicted_by_at_least_one_method(IslandPath-DIMOB)	18	0	phage tail sheath-like protein [Ralstonia solanacearum GMI1000]
|WP_015872385.1|locus|NT01EI_RS13745|prediction_method|Predicted_by_at_least_one_method(IslandPath-DIMOB,IslandPick)	14	0	phage-like protein [Ralstonia solanacearum GMI1000]
|WP_015872385.1|locus|NT01EI_RS13745|prediction_method|Predicted_by_at_least_one_method(IslandPath-DIMOB,IslandPick)	14	0	phage-like protein [Ralstonia solanacearum GMI1000]
|WP_015869774.1|locus|NT01EI_RS01425|prediction_method|Predicted_by_at_least_one_method(Islander,IslandPath-DIMOB)	10	0	DNA topoisomerase III [Salmonella enterica subsp. enterica serovar Typhi str. Ty2]
|WP_035608843.1|locus|NT01EI_RS01475|prediction_method|Predicted_by_at_least_one_method(Islander,IslandPath-DIMOB)	18	0	hypothetical protein t4260 [Salmonella enterica subsp. enterica serovar Typhi str. Ty2]
|WP_015869795.1|locus|NT01EI_RS01530|prediction_method|Predicted_by_at_least_one_method(Islander,IslandPath-DIMOB)	14	0	hypothetical protein t4270 [Salmonella enterica subsp. enterica serovar Typhi str. Ty2]
|WP_050977389.1|locus|NT01EI_RS01565|prediction_method|Predicted_by_at_least_one_method(Islander,IslandPath-DIMOB,SIGI-HMM)	10	0	hypothetical protein t4274 [Salmonella enterica subsp. enterica serovar Typhi str. Ty2]
|WP_015869804.1|locus|NT01EI_RS01575|prediction_method|Predicted_by_at_least_one_method(Islander,IslandPath-DIMOB,SIGI-HMM)	3	0	hypothetical protein t4276 [Salmonella enterica subsp. enterica serovar Typhi str. Ty2]
|WP_015869816.1|locus|NT01EI_RS01635|prediction_method|Predicted_by_at_least_one_method(Islander)	14	0	putative DNA helicase [Salmonella enterica subsp. enterica serovar Typhi str. Ty2]
|WP_015869774.1|locus|NT01EI_RS01425|prediction_method|Predicted_by_at_least_one_method(Islander,IslandPath-DIMOB)	10	0	DNA topoisomerase III [Salmonella enterica subsp. enterica serovar Typhi str. Ty2]
|WP_035608843.1|locus|NT01EI_RS01475|prediction_method|Predicted_by_at_least_one_method(Islander,IslandPath-DIMOB)	18	0	hypothetical protein t4260 [Salmonella enterica subsp. enterica serovar Typhi str. Ty2]
|WP_015869795.1|locus|NT01EI_RS01530|prediction_method|Predicted_by_at_least_one_method(Islander,IslandPath-DIMOB)	14	0	hypothetical protein t4270 [Salmonella enterica subsp. enterica serovar Typhi str. Ty2]
|WP_050977389.1|locus|NT01EI_RS01565|prediction_method|Predicted_by_at_least_one_method(Islander,IslandPath-DIMOB,SIGI-HMM)	10	0	hypothetical protein t4274 [Salmonella enterica subsp. enterica serovar Typhi str. Ty2]
|WP_015869804.1|locus|NT01EI_RS01575|prediction_method|Predicted_by_at_least_one_method(Islander,IslandPath-DIMOB,SIGI-HMM)	3	0	hypothetical protein t4276 [Salmonella enterica subsp. enterica serovar Typhi str. Ty2]
|WP_050977389.1|locus|NT01EI_RS01565|prediction_method|Predicted_by_at_least_one_method(Islander,IslandPath-DIMOB,SIGI-HMM)	10	0	hypothetical protein t4274 [Salmonella enterica subsp. enterica serovar Typhi str. Ty2]
|WP_015869804.1|locus|NT01EI_RS01575|prediction_method|Predicted_by_at_least_one_method(Islander,IslandPath-DIMOB,SIGI-HMM)	3	0	hypothetical protein t4276 [Salmonella enterica subsp. enterica serovar Typhi str. Ty2]
|WP_015870676.1|locus|NT01EI_RS05850|prediction_method|Predicted_by_at_least_one_method(IslandPath-DIMOB)	100	0	SubName: Full=Nucleotide sugar epimerase;
|WP_015871369.1|locus|NT01EI_RS09010|prediction_method|Predicted_by_at_least_one_method(IslandPick)	100	0	RecName: Full=Urease subunit alpha; EC=3.5.1.5; AltName: Full=Urea amidohydrolase subunit alpha;
|WP_041730437.1|locus|NT01EI_RS09690|prediction_method|Predicted_by_at_least_one_method(IslandPath-DIMOB)	98	0	transposase of insertion element IS3 [Escherichia coli]
|WP_015871545.1|locus|NT01EI_RS09775|prediction_method|Predicted_by_at_least_one_method(IslandPath-DIMOB,Islander)	7	0	putative phage replication protein [Escherichia coli O157:H7 str. Sakai]
|WP_015871531.1|locus|NT01EI_RS09715|prediction_method|Predicted_by_at_least_one_method(IslandPath-DIMOB,SIGI-HMM,Islander)	100	1.01e-176	putative integrase [Escherichia coli O157:H7 str. Sakai]
|WP_015871531.1|locus|NT01EI_RS09715|prediction_method|Predicted_by_at_least_one_method(IslandPath-DIMOB,SIGI-HMM,Islander)	100	1.01e-176	putative integrase [Escherichia coli O157:H7 str. Sakai]
|WP_015871531.1|locus|NT01EI_RS09715|prediction_method|Predicted_by_at_least_one_method(IslandPath-DIMOB,SIGI-HMM,Islander)	100	1.01e-176	putative integrase [Escherichia coli O157:H7 str. Sakai]
|WP_035608635.1|locus|NT01EI_RS01595|prediction_method|Predicted_by_at_least_one_method(Islander,IslandPath-DIMOB)	6	3.42e-175	hypothetical protein t4280 [Salmonella enterica subsp. enterica serovar Typhi str. Ty2]
|WP_035608635.1|locus|NT01EI_RS01595|prediction_method|Predicted_by_at_least_one_method(Islander,IslandPath-DIMOB)	6	3.42e-175	hypothetical protein t4280 [Salmonella enterica subsp. enterica serovar Typhi str. Ty2]
|WP_035609796.1|locus|NT01EI_RS05840|prediction_method|Predicted_by_at_least_one_method(IslandPath-DIMOB)	90	7.22e-167	UDP-glucose 4-epimerase [Yersinia enterocolitica subsp. enterocolitica 8081]
|WP_015869766.1|locus|NT01EI_RS01385|prediction_method|Predicted_by_at_least_one_method(Islander)	5	2.39e-166	DNA helicase [Salmonella enterica subsp. enterica serovar Typhi str. Ty2]
|WP_015869801.1|locus|NT01EI_RS01560|prediction_method|Predicted_by_at_least_one_method(Islander,IslandPath-DIMOB)	20	4e-159	hypothetical protein t4273 [Salmonella enterica subsp. enterica serovar Typhi str. Ty2]
|WP_015869801.1|locus|NT01EI_RS01560|prediction_method|Predicted_by_at_least_one_method(Islander,IslandPath-DIMOB)	20	4e-159	hypothetical protein t4273 [Salmonella enterica subsp. enterica serovar Typhi str. Ty2]
|WP_015869793.1|locus|NT01EI_RS01520|prediction_method|Predicted_by_at_least_one_method(Islander,IslandPath-DIMOB)	7	5.2e-157	hypothetical protein t4268 [Salmonella enterica subsp. enterica serovar Typhi str. Ty2]
|WP_015869793.1|locus|NT01EI_RS01520|prediction_method|Predicted_by_at_least_one_method(Islander,IslandPath-DIMOB)	7	5.2e-157	hypothetical protein t4268 [Salmonella enterica subsp. enterica serovar Typhi str. Ty2]
|WP_015872355.1|locus|NT01EI_RS13595|prediction_method|Predicted_by_at_least_one_method(IslandPath-DIMOB)	24	4.46e-153	portal vertex-like protein [Enterobacteria phage Fels-2]
|WP_015870675.1|locus|NT01EI_RS05845|prediction_method|Predicted_by_at_least_one_method(IslandPath-DIMOB)|annotations|RGI	20	4.08e-149	UDP-glucose 6-dehydrogenase [Streptococcus pyogenes M1 GAS]
|WP_015869767.1|locus|NT01EI_RS01390|prediction_method|Predicted_by_at_least_one_method(Islander,IslandPath-DIMOB)	17	5.8e-149	hypothetical protein t4228 [Salmonella enterica subsp. enterica serovar Typhi str. Ty2]
|WP_015869767.1|locus|NT01EI_RS01390|prediction_method|Predicted_by_at_least_one_method(Islander,IslandPath-DIMOB)	17	5.8e-149	hypothetical protein t4228 [Salmonella enterica subsp. enterica serovar Typhi str. Ty2]
|WP_015870690.1|locus|NT01EI_RS05940|prediction_method|Predicted_by_at_least_one_method(IslandPath-DIMOB)	111	3.06e-140	leucine-rich repeat-containing protein [Salmonella typhimurium LT2]
|WP_015870679.1|locus|NT01EI_RS05865|prediction_method|Predicted_by_at_least_one_method(IslandPath-DIMOB,SIGI-HMM)	12	2.02e-139	N-acetyl neuramic acid synthetase NeuB [Streptococcus agalactiae 2603V/R]
|WP_015870679.1|locus|NT01EI_RS05865|prediction_method|Predicted_by_at_least_one_method(IslandPath-DIMOB,SIGI-HMM)	12	2.02e-139	N-acetyl neuramic acid synthetase NeuB [Streptococcus agalactiae 2603V/R]
|WP_015871366.1|locus|NT01EI_RS08995|prediction_method|Predicted_by_at_least_one_method(SIGI-HMM,IslandPick)	17	1.67e-137	urease accessory protein
|WP_015871366.1|locus|NT01EI_RS08995|prediction_method|Predicted_by_at_least_one_method(SIGI-HMM,IslandPick)	17	1.67e-137	urease accessory protein
|WP_015872358.1|locus|NT01EI_RS13610|prediction_method|Predicted_by_at_least_one_method(IslandPath-DIMOB)	5	1.09e-135	bacteriophage protein [Ralstonia solanacearum GMI1000]
|WP_015871551.1|locus|NT01EI_RS09790|prediction_method|Predicted_by_at_least_one_method(Islander)	12	1.36e-128	terminase-like protein [Enterobacteria phage Fels-2]
|WP_015872380.1|locus|NT01EI_RS13720|prediction_method|Predicted_by_at_least_one_method(IslandPath-DIMOB)	12	7.66e-128	late control-like protein [Salmonella enterica subsp. enterica serovar Typhimurium str. LT2]
|WP_015869797.1|locus|NT01EI_RS01540|prediction_method|Predicted_by_at_least_one_method(Islander,IslandPath-DIMOB)	20	1.17e-126	ISSod4, transposase [Shewanella oneidensis MR-1]
|WP_015869797.1|locus|NT01EI_RS01540|prediction_method|Predicted_by_at_least_one_method(Islander,IslandPath-DIMOB)	20	1.17e-126	ISSod4, transposase [Shewanella oneidensis MR-1]
|WP_015869798.1|locus|NT01EI_RS01545|prediction_method|Predicted_by_at_least_one_method(Islander,IslandPath-DIMOB)	13	1.21e-126	ISSod4, transposase [Shewanella oneidensis MR-1]
|WP_015869798.1|locus|NT01EI_RS01545|prediction_method|Predicted_by_at_least_one_method(Islander,IslandPath-DIMOB)	13	1.21e-126	ISSod4, transposase [Shewanella oneidensis MR-1]
|WP_015870371.1|locus|NT01EI_RS14445|prediction_method|Predicted_by_at_least_one_method(IslandPath-DIMOB,IslandPick)	20	1.58e-126	ISSod4, transposase [Shewanella oneidensis MR-1]
|WP_015870371.1|locus|NT01EI_RS14445|prediction_method|Predicted_by_at_least_one_method(IslandPath-DIMOB,IslandPick)	20	1.58e-126	ISSod4, transposase [Shewanella oneidensis MR-1]
|WP_015870371.1|locus|NT01EI_RS05925|prediction_method|Predicted_by_at_least_one_method(IslandPath-DIMOB)	20	1.58e-126	ISSod4, transposase [Shewanella oneidensis MR-1]
|WP_015870371.1|locus|NT01EI_RS06775|prediction_method|Predicted_by_at_least_one_method(IslandPath-DIMOB)	20	1.58e-126	ISSod4, transposase [Shewanella oneidensis MR-1]
|WP_015870371.1|locus|NT01EI_RS09695|prediction_method|Predicted_by_at_least_one_method(IslandPath-DIMOB)	20	1.58e-126	ISSod4, transposase [Shewanella oneidensis MR-1]
|WP_015869530.1|locus|NT01EI_RS10055|prediction_method|Predicted_by_at_least_one_method(IslandPath-DIMOB)	13	6.03e-126	ISSod4, transposase [Shewanella oneidensis MR-1]
|WP_015869530.1|locus|NT01EI_RS13345|prediction_method|Predicted_by_at_least_one_method(IslandPath-DIMOB)	13	6.03e-126	ISSod4, transposase [Shewanella oneidensis MR-1]
|WP_015870321.1|locus|NT01EI_RS14500|prediction_method|Predicted_by_at_least_one_method(IslandPath-DIMOB)	20	8.18e-126	ISSod4, transposase [Shewanella oneidensis MR-1]
|WP_015872370.1|locus|NT01EI_RS13675|prediction_method|Predicted_by_at_least_one_method(IslandPath-DIMOB)	14	1.94e-122	phage baseplate assembly protein [Salmonella enterica subsp. enterica serovar Typhi str. Ty2]
|WP_015869763.1|locus|NT01EI_RS01370|prediction_method|Predicted_by_at_least_one_method(SIGI-HMM,Islander)	15	3.04e-117	hypothetical protein t4226 [Salmonella enterica subsp. enterica serovar Typhi str. Ty2]
|WP_015869763.1|locus|NT01EI_RS01370|prediction_method|Predicted_by_at_least_one_method(SIGI-HMM,Islander)	15	3.04e-117	hypothetical protein t4226 [Salmonella enterica subsp. enterica serovar Typhi str. Ty2]
|WP_071820497.1|locus|NT01EI_RS18525|prediction_method|Predicted_by_at_least_one_method(IslandPath-DIMOB)	76	1.01e-116	invasin [Yersinia enterocolitica]
|WP_015872654.1|locus|NT01EI_RS15070|prediction_method|Predicted_by_at_least_one_method(IslandPath-DIMOB)	85	8.98e-115	type I restriction-modification system specificity subunit [Bradyrhizobium japonicum USDA 110]
|WP_015870832.1|locus|NT01EI_RS06570|prediction_method|Predicted_by_at_least_one_method(IslandPath-DIMOB,SIGI-HMM)	58	4.07e-114	modification methylase very EcoRII cytosine-specificmethyltransferase [Bifidobacterium longum NCC2705]
|WP_015870832.1|locus|NT01EI_RS06570|prediction_method|Predicted_by_at_least_one_method(IslandPath-DIMOB,SIGI-HMM)	58	4.07e-114	modification methylase very EcoRII cytosine-specificmethyltransferase [Bifidobacterium longum NCC2705]
|WP_015869818.1|locus|NT01EI_RS01645|prediction_method|Predicted_by_at_least_one_method(Islander)	77	4e-113	phage integrase [Salmonella enterica subsp. enterica serovar Typhi str. Ty2]
|WP_015871592.1|locus|NT01EI_RS10010|prediction_method|Predicted_by_at_least_one_method(IslandPath-DIMOB)	16	8.69e-113	hypothetical protein c3192 [Escherichia coli CFT073]
|WP_015869791.1|locus|NT01EI_RS01510|prediction_method|Predicted_by_at_least_one_method(Islander,IslandPath-DIMOB)	6	4.55e-112	hypothetical protein t4265 [Salmonella enterica subsp. enterica serovar Typhi str. Ty2]
|WP_015869791.1|locus|NT01EI_RS01510|prediction_method|Predicted_by_at_least_one_method(Islander,IslandPath-DIMOB)	6	4.55e-112	hypothetical protein t4265 [Salmonella enterica subsp. enterica serovar Typhi str. Ty2]
|WP_015869792.1|locus|NT01EI_RS01515|prediction_method|Predicted_by_at_least_one_method(Islander,IslandPath-DIMOB)	2	9.86e-111	hypothetical protein t4266 [Salmonella enterica subsp. enterica serovar Typhi str. Ty2]
|WP_015869792.1|locus|NT01EI_RS01515|prediction_method|Predicted_by_at_least_one_method(Islander,IslandPath-DIMOB)	2	9.86e-111	hypothetical protein t4266 [Salmonella enterica subsp. enterica serovar Typhi str. Ty2]
|WP_015871367.1|locus|NT01EI_RS09000|prediction_method|Predicted_by_at_least_one_method(SIGI-HMM,IslandPick)	9	2.93e-107	urease accessory protein
|WP_015871367.1|locus|NT01EI_RS09000|prediction_method|Predicted_by_at_least_one_method(SIGI-HMM,IslandPick)	9	2.93e-107	urease accessory protein
|WP_015870681.1|locus|NT01EI_RS05875|prediction_method|Predicted_by_at_least_one_method(IslandPath-DIMOB,SIGI-HMM)	13	1.81e-106	UDP-N-acetylglucosamine-2-epimerase NeuC [Streptococcus agalactiae 2603V/R]
|WP_015870681.1|locus|NT01EI_RS05875|prediction_method|Predicted_by_at_least_one_method(IslandPath-DIMOB,SIGI-HMM)	13	1.81e-106	UDP-N-acetylglucosamine-2-epimerase NeuC [Streptococcus agalactiae 2603V/R]
|WP_015871364.1|locus|NT01EI_RS08985|prediction_method|Predicted_by_at_least_one_method(SIGI-HMM)	4	8.13e-104	urea transporter
|WP_015870885.1|locus|NT01EI_RS06780|prediction_method|Predicted_by_at_least_one_method(IslandPath-DIMOB)	15	8.29e-100	IS1328 transposase [Shigella flexneri 2a]
|WP_015870885.1|locus|NT01EI_RS09700|prediction_method|Predicted_by_at_least_one_method(IslandPath-DIMOB)	15	8.29e-100	IS1328 transposase [Shigella flexneri 2a]
|WP_015872529.1|locus|NT01EI_RS14490|prediction_method|Predicted_by_at_least_one_method(IslandPath-DIMOB,IslandPick)	15	3.02e-99	IS1328 transposase [Shigella flexneri 2a]
|WP_015872529.1|locus|NT01EI_RS14490|prediction_method|Predicted_by_at_least_one_method(IslandPath-DIMOB,IslandPick)	15	3.02e-99	IS1328 transposase [Shigella flexneri 2a]
|WP_015871530.1|locus|NT01EI_RS09710|prediction_method|Predicted_by_at_least_one_method(IslandPath-DIMOB,SIGI-HMM)	20	6.46e-98	putative integrase for prophage CP-933U [Shigella flexneri 2a str. 301]
|WP_015871530.1|locus|NT01EI_RS09710|prediction_method|Predicted_by_at_least_one_method(IslandPath-DIMOB,SIGI-HMM)	20	6.46e-98	putative integrase for prophage CP-933U [Shigella flexneri 2a str. 301]
|WP_015869780.1|locus|NT01EI_RS01455|prediction_method|Predicted_by_at_least_one_method(Islander,IslandPath-DIMOB)	8	7.95e-97	hypothetical protein t4256 [Salmonella enterica subsp. enterica serovar Typhi str. Ty2]
|WP_015869780.1|locus|NT01EI_RS01455|prediction_method|Predicted_by_at_least_one_method(Islander,IslandPath-DIMOB)	8	7.95e-97	hypothetical protein t4256 [Salmonella enterica subsp. enterica serovar Typhi str. Ty2]
|WP_015872378.1|locus|NT01EI_RS13710|prediction_method|Predicted_by_at_least_one_method(IslandPath-DIMOB)	39	2.55e-94	putative tail protein [Escherichia coli O157:H7]
|WP_071820490.1|locus|NT01EI_RS05920|prediction_method|Predicted_by_at_least_one_method(IslandPath-DIMOB)	74	1.35e-92	putative transposase [Escherichia coli O157:H7 str. Sakai]
|WP_015869771.1|locus|NT01EI_RS01410|prediction_method|Predicted_by_at_least_one_method(Islander,IslandPath-DIMOB)	7	1.12e-88	hypothetical protein t4232 [Salmonella enterica subsp. enterica serovar Typhi str. Ty2]
|WP_015869771.1|locus|NT01EI_RS01410|prediction_method|Predicted_by_at_least_one_method(Islander,IslandPath-DIMOB)	7	1.12e-88	hypothetical protein t4232 [Salmonella enterica subsp. enterica serovar Typhi str. Ty2]
|WP_015872371.1|locus|NT01EI_RS13680|prediction_method|Predicted_by_at_least_one_method(IslandPath-DIMOB)	7	1.73e-84	tail formation-like protein [Ralstonia solanacearum GMI1000]
|WP_035608421.1|locus|NT01EI_RS10025|prediction_method|Predicted_by_at_least_one_method(IslandPath-DIMOB)	3	4.5e-81	hypothetical protein c3195 [Escherichia coli CFT073]
|WP_015872650.1|locus|NT01EI_RS15050|prediction_method|Predicted_by_at_least_one_method(IslandPath-DIMOB)	13	3.86e-77	putative type I restriction enzyme R protein [Sinorhizobium meliloti 1021]
|WP_015872357.1|locus|NT01EI_RS13605|prediction_method|Predicted_by_at_least_one_method(IslandPath-DIMOB)	11	2.57e-75	putative capsid protein [Salmonella enterica subsp. enterica serovar Typhi str. Ty2]
|WP_035610209.1|locus|NT01EI_RS13010|prediction_method|Predicted_by_at_least_one_method(IslandPath-DIMOB)	22	1.73e-73	hypothetical protein t4278 [Salmonella enterica subsp. enterica serovar Typhi str. Ty2]
|WP_015871969.1|locus|NT01EI_RS11715|prediction_method|Predicted_by_at_least_one_method(IslandPath-DIMOB)	13	5.05e-73	IS1328 transposase [Shigella flexneri 2a]
|WP_015869785.1|locus|NT01EI_RS01480|prediction_method|Predicted_by_at_least_one_method(Islander,IslandPath-DIMOB)	2	8.82e-70	hypothetical protein t4261 [Salmonella enterica subsp. enterica serovar Typhi str. Ty2]
|WP_015869785.1|locus|NT01EI_RS01480|prediction_method|Predicted_by_at_least_one_method(Islander,IslandPath-DIMOB)	2	8.82e-70	hypothetical protein t4261 [Salmonella enterica subsp. enterica serovar Typhi str. Ty2]
|WP_015869775.1|locus|NT01EI_RS01430|prediction_method|Predicted_by_at_least_one_method(Islander,IslandPath-DIMOB)	7	1.48e-69	hypothetical protein t4235 [Salmonella enterica subsp. enterica serovar Typhi str. Ty2]
|WP_015869775.1|locus|NT01EI_RS01430|prediction_method|Predicted_by_at_least_one_method(Islander,IslandPath-DIMOB)	7	1.48e-69	hypothetical protein t4235 [Salmonella enterica subsp. enterica serovar Typhi str. Ty2]
|WP_015869773.1|locus|NT01EI_RS01420|prediction_method|Predicted_by_at_least_one_method(Islander,IslandPath-DIMOB)	8	1.75e-68	hypothetical protein STY4529 [Salmonella enterica subsp. enterica serovar Typhi str. CT18]
|WP_015869773.1|locus|NT01EI_RS01420|prediction_method|Predicted_by_at_least_one_method(Islander,IslandPath-DIMOB)	8	1.75e-68	hypothetical protein STY4529 [Salmonella enterica subsp. enterica serovar Typhi str. CT18]
|WP_015871546.1|locus|NT01EI_RS18270|prediction_method|Predicted_by_at_least_one_method(IslandPath-DIMOB,Islander)	7	8.7e-68	SubName: Full=Putative uncharacterized protein;
|WP_015871546.1|locus|NT01EI_RS18270|prediction_method|Predicted_by_at_least_one_method(IslandPath-DIMOB,Islander)	7	8.7e-68	SubName: Full=Putative uncharacterized protein;
|WP_015871368.1|locus|NT01EI_RS18150|prediction_method|Predicted_by_at_least_one_method(SIGI-HMM,IslandPick)	4	4e-66	urease accessory protein
|WP_015871368.1|locus|NT01EI_RS18150|prediction_method|Predicted_by_at_least_one_method(SIGI-HMM,IslandPick)	4	4e-66	urease accessory protein
|WP_015872359.1|locus|NT01EI_RS13615|prediction_method|Predicted_by_at_least_one_method(IslandPath-DIMOB)	11	5.43e-66	bacteriophage protein [Ralstonia solanacearum GMI1000]
|WP_015872376.1|locus|NT01EI_RS13700|prediction_method|Predicted_by_at_least_one_method(IslandPath-DIMOB)	12	3.34e-65	major tail tube protein [Salmonella enterica subsp. enterica serovar Typhi str. Ty2]
|WP_015872363.1|locus|NT01EI_RS13640|prediction_method|Predicted_by_at_least_one_method(IslandPath-DIMOB)	3	5.96e-64	putative phage-related protein hydrolase [Ralstonia solanacearum GMI1000]
|WP_015871596.1|locus|NT01EI_RS10035|prediction_method|Predicted_by_at_least_one_method(IslandPath-DIMOB)	13	1.18e-62	hypothetical protein ECs0274 [Escherichia coli O157:H7 str. Sakai]
|WP_050977451.1|locus|NT01EI_RS09785|prediction_method|Predicted_by_at_least_one_method(Islander)	17	3.22e-61	portal vertex-like protein [Enterobacteria phage Fels-2]
|WP_035610197.1|locus|NT01EI_RS13340|prediction_method|Predicted_by_at_least_one_method(IslandPath-DIMOB)	100	9.14e-61	IS1477 transposase [Xanthomonas campestris pv. campestris str. ATCC 33913]
|WP_035609318.1|locus|NT01EI_RS11705|prediction_method|Predicted_by_at_least_one_method(IslandPath-DIMOB)	100	2.35e-59	IS1477 transposase [Xanthomonas campestris pv. campestris str. ATCC 33913]
|WP_035608840.1|locus|NT01EI_RS01460|prediction_method|Predicted_by_at_least_one_method(Islander,IslandPath-DIMOB)	6	4.01e-59	hypothetical protein t4257 [Salmonella enterica subsp. enterica serovar Typhi str. Ty2]
|WP_035608840.1|locus|NT01EI_RS01460|prediction_method|Predicted_by_at_least_one_method(Islander,IslandPath-DIMOB)	6	4.01e-59	hypothetical protein t4257 [Salmonella enterica subsp. enterica serovar Typhi str. Ty2]
|WP_015872313.1|locus|NT01EI_RS13435|prediction_method|Predicted_by_at_least_one_method(IslandPath-DIMOB,SIGI-HMM)	104	6.9e-59	lipid transporter ATP-binding/permease protein [Salmonella enterica subsp. enterica serovar Typhimurium str. LT2]
|WP_015872313.1|locus|NT01EI_RS13435|prediction_method|Predicted_by_at_least_one_method(IslandPath-DIMOB,SIGI-HMM)	104	6.9e-59	lipid transporter ATP-binding/permease protein [Salmonella enterica subsp. enterica serovar Typhimurium str. LT2]
|WP_015872544.1|locus|NT01EI_RS14570|prediction_method|Predicted_by_at_least_one_method(IslandPath-DIMOB,SIGI-HMM)	12	1.81e-58	hypothetical protein Z1200 [Escherichia coli O157:H7 EDL933]
|WP_015872544.1|locus|NT01EI_RS14570|prediction_method|Predicted_by_at_least_one_method(IslandPath-DIMOB,SIGI-HMM)	12	1.81e-58	hypothetical protein Z1200 [Escherichia coli O157:H7 EDL933]
|WP_015870673.1|locus|NT01EI_RS05835|prediction_method|Predicted_by_at_least_one_method(IslandPath-DIMOB)	20	3.49e-58	UDP-glucose pyrophosphorylase [Streptococcus pyogenes M1 GAS]
|WP_015872858.1|locus|NT01EI_RS16215|prediction_method|Predicted_by_at_least_one_method(SIGI-HMM)	102	4.45e-58	hypothetical protein gbs0131 [Streptococcus agalactiae NEM316]
|WP_015872298.1|locus|NT01EI_RS13370|prediction_method|Predicted_by_at_least_one_method(IslandPath-DIMOB)	10	1.26e-57	hypothetical protein Z1200 [Escherichia coli O157:H7 EDL933]
|WP_015871972.1|locus|NT01EI_RS11725|prediction_method|Predicted_by_at_least_one_method(IslandPath-DIMOB,SIGI-HMM)	28	1.36e-57	4-hydroxyphenylacetate catabolism [Salmonella enterica subsp. enterica serovar Typhimurium str. LT2]
|WP_015871972.1|locus|NT01EI_RS11725|prediction_method|Predicted_by_at_least_one_method(IslandPath-DIMOB,SIGI-HMM)	28	1.36e-57	4-hydroxyphenylacetate catabolism [Salmonella enterica subsp. enterica serovar Typhimurium str. LT2]
|WP_015869762.1|locus|NT01EI_RS01365|prediction_method|Predicted_by_at_least_one_method(SIGI-HMM)	31	1.76e-57	RecName: Full=Arginine repressor;
|WP_015872389.1|locus|NT01EI_RS13765|prediction_method|Predicted_by_at_least_one_method(IslandPath-DIMOB,IslandPick)	100	4.27e-57	site-specific recombinase, phage integrase family [Pseudomonas syringae pv. tomato str. DC3000]
|WP_015872389.1|locus|NT01EI_RS13765|prediction_method|Predicted_by_at_least_one_method(IslandPath-DIMOB,IslandPick)	100	4.27e-57	site-specific recombinase, phage integrase family [Pseudomonas syringae pv. tomato str. DC3000]
|WP_015871561.1|locus|NT01EI_RS09840|prediction_method|Predicted_by_at_least_one_method(Islander)	5	9.22e-56	putative secretion activating protein [Vibrio vulnificus CMCP6]
|WP_015869729.1|locus|NT01EI_RS18560|prediction_method|Predicted_by_at_least_one_method(IslandPath-DIMOB)	6	9.51e-56	TIS1421-transposase protein B [Ralstonia solanacearum GMI1000]
|WP_015869729.1|locus|NT01EI_RS17845|prediction_method|Predicted_by_at_least_one_method(IslandPath-DIMOB,SIGI-HMM)	6	9.51e-56	TIS1421-transposase protein B [Ralstonia solanacearum GMI1000]
|WP_015869729.1|locus|NT01EI_RS17845|prediction_method|Predicted_by_at_least_one_method(IslandPath-DIMOB,SIGI-HMM)	6	9.51e-56	TIS1421-transposase protein B [Ralstonia solanacearum GMI1000]
|WP_071820500.1|locus|NT01EI_RS18245|prediction_method|Predicted_by_at_least_one_method(IslandPath-DIMOB)	11	1.16e-55	TIS1421-transposase protein B [Ralstonia solanacearum GMI1000]
|WP_015869770.1|locus|NT01EI_RS01405|prediction_method|Predicted_by_at_least_one_method(Islander,IslandPath-DIMOB)	7	1.11e-54	hypothetical protein t4231 [Salmonella enterica subsp. enterica serovar Typhi str. Ty2]
|WP_015869770.1|locus|NT01EI_RS01405|prediction_method|Predicted_by_at_least_one_method(Islander,IslandPath-DIMOB)	7	1.11e-54	hypothetical protein t4231 [Salmonella enterica subsp. enterica serovar Typhi str. Ty2]
|WP_035608665.1|locus|NT01EI_RS01605|prediction_method|Predicted_by_at_least_one_method(Islander,IslandPath-DIMOB)	8	2.01e-54	antirestriction protein [Bradyrhizobium japonicum USDA 110]
|WP_035608665.1|locus|NT01EI_RS01605|prediction_method|Predicted_by_at_least_one_method(Islander,IslandPath-DIMOB)	8	2.01e-54	antirestriction protein [Bradyrhizobium japonicum USDA 110]
|WP_035608849.1|locus|NT01EI_RS01525|prediction_method|Predicted_by_at_least_one_method(Islander,IslandPath-DIMOB)	4	3.02e-52	putative lipoprotein [Salmonella enterica subsp. enterica serovar Typhi str. Ty2]
|WP_035608849.1|locus|NT01EI_RS01525|prediction_method|Predicted_by_at_least_one_method(Islander,IslandPath-DIMOB)	4	3.02e-52	putative lipoprotein [Salmonella enterica subsp. enterica serovar Typhi str. Ty2]
|WP_015870680.1|locus|NT01EI_RS05870|prediction_method|Predicted_by_at_least_one_method(IslandPath-DIMOB,SIGI-HMM)	23	6.82e-52	CMP-N-acetylneuraminic acid synthetase NeuA [Streptococcus agalactiae 2603V/R]
|WP_015870680.1|locus|NT01EI_RS05870|prediction_method|Predicted_by_at_least_one_method(IslandPath-DIMOB,SIGI-HMM)	23	6.82e-52	CMP-N-acetylneuraminic acid synthetase NeuA [Streptococcus agalactiae 2603V/R]
|WP_071525772.1|locus|NT01EI_RS17930|prediction_method|Predicted_by_at_least_one_method(IslandPath-DIMOB)	8	7.22e-52	TIS1421-transposase protein B [Ralstonia solanacearum GMI1000]
|WP_015872379.1|locus|NT01EI_RS13715|prediction_method|Predicted_by_at_least_one_method(IslandPath-DIMOB)	10	1.72e-51	putative phage tail protein [Salmonella enterica subsp. enterica serovar Typhi str. Ty2]
|WP_071525710.1|locus|NT01EI_RS18775|prediction_method|Predicted_by_at_least_one_method(IslandPath-DIMOB)	7	1.63e-50	TIS1421-transposase protein B [Ralstonia solanacearum GMI1000]
|WP_035610194.1|locus|NT01EI_RS13020|prediction_method|Predicted_by_at_least_one_method(IslandPath-DIMOB)	21	2.86e-50	hypothetical protein c1168 [Escherichia coli CFT073]
|WP_015872283.1|locus|NT01EI_RS13310|prediction_method|Predicted_by_at_least_one_method(IslandPath-DIMOB)	11	1.49e-49	eukaryotic translation initiation factor 4A [Toxoplasma gondii]
|WP_015872526.1|locus|NT01EI_RS14475|prediction_method|Predicted_by_at_least_one_method(IslandPath-DIMOB)	4	9.14e-48	hypothetical protein c1207 [Escherichia coli CFT073]
|WP_010895411.1|locus|NT01EI_RS06585|prediction_method|Predicted_by_at_least_one_method(IslandPath-DIMOB,SIGI-HMM)	6	6.18e-47	TIS1421-transposase protein A [Ralstonia solanacearum GMI1000]
|WP_010895411.1|locus|NT01EI_RS06585|prediction_method|Predicted_by_at_least_one_method(IslandPath-DIMOB,SIGI-HMM)	6	6.18e-47	TIS1421-transposase protein A [Ralstonia solanacearum GMI1000]
|WP_010895411.1|locus|NT01EI_RS09685|prediction_method|Predicted_by_at_least_one_method(IslandPath-DIMOB)	6	6.18e-47	TIS1421-transposase protein A [Ralstonia solanacearum GMI1000]
|WP_015871532.1|locus|NT01EI_RS09720|prediction_method|Predicted_by_at_least_one_method(IslandPath-DIMOB,SIGI-HMM,Islander)	7	1.97e-46	hypothetical protein ECs2619 [Escherichia coli O157:H7 str. Sakai]
|WP_015871532.1|locus|NT01EI_RS09720|prediction_method|Predicted_by_at_least_one_method(IslandPath-DIMOB,SIGI-HMM,Islander)	7	1.97e-46	hypothetical protein ECs2619 [Escherichia coli O157:H7 str. Sakai]
|WP_015871532.1|locus|NT01EI_RS09720|prediction_method|Predicted_by_at_least_one_method(IslandPath-DIMOB,SIGI-HMM,Islander)	7	1.97e-46	hypothetical protein ECs2619 [Escherichia coli O157:H7 str. Sakai]
|WP_015872368.1|locus|NT01EI_RS13665|prediction_method|Predicted_by_at_least_one_method(IslandPath-DIMOB)	14	3.97e-45	phage baseplate assembly-like protein [Salmonella enterica subsp. enterica serovar Typhimurium str. LT2]
|WP_015872387.1|locus|NT01EI_RS13755|prediction_method|Predicted_by_at_least_one_method(IslandPath-DIMOB,IslandPick)	8	2.83e-44	hypothetical protein lin0088 [Listeria innocua Clip11262]
|WP_015872387.1|locus|NT01EI_RS13755|prediction_method|Predicted_by_at_least_one_method(IslandPath-DIMOB,IslandPick)	8	2.83e-44	hypothetical protein lin0088 [Listeria innocua Clip11262]
|WP_015872258.1|locus|NT01EI_RS13175|prediction_method|Predicted_by_at_least_one_method(IslandPath-DIMOB)	104	1.12e-43	ABC transporter, ATP-binding protein [Enterococcus faecalis V583]
|WP_015869813.1|locus|NT01EI_RS01615|prediction_method|Predicted_by_at_least_one_method(Islander)	25	1.07e-42	hypothetical protein t4286 [Salmonella enterica subsp. enterica serovar Typhi str. Ty2]
|WP_015872364.1|locus|NT01EI_RS13645|prediction_method|Predicted_by_at_least_one_method(IslandPath-DIMOB)	9	4.85e-42	tail completion-like protein [Ralstonia solanacearum GMI1000]
|WP_015869778.1|locus|NT01EI_RS01445|prediction_method|Predicted_by_at_least_one_method(Islander,IslandPath-DIMOB)	9	1.1e-41	putative type IV pilus operon lipoprotein [Yersinia enterocolitica subsp. enterocolitica 8081]
|WP_015869778.1|locus|NT01EI_RS01445|prediction_method|Predicted_by_at_least_one_method(Islander,IslandPath-DIMOB)	9	1.1e-41	putative type IV pilus operon lipoprotein [Yersinia enterocolitica subsp. enterocolitica 8081]
|WP_015869782.1|locus|NT01EI_RS01465|prediction_method|Predicted_by_at_least_one_method(Islander,IslandPath-DIMOB)	3	5.46e-41	hypothetical protein t4258 [Salmonella enterica subsp. enterica serovar Typhi str. Ty2]
|WP_015869782.1|locus|NT01EI_RS01465|prediction_method|Predicted_by_at_least_one_method(Islander,IslandPath-DIMOB)	3	5.46e-41	hypothetical protein t4258 [Salmonella enterica subsp. enterica serovar Typhi str. Ty2]
|WP_015871973.1|locus|NT01EI_RS18460|prediction_method|Predicted_by_at_least_one_method(IslandPath-DIMOB,SIGI-HMM)	5	2.55e-39	phosphonopyruvate decarboxylase fragment [Streptomyces coelicolor A3 2 ]
|WP_015871973.1|locus|NT01EI_RS18460|prediction_method|Predicted_by_at_least_one_method(IslandPath-DIMOB,SIGI-HMM)	5	2.55e-39	phosphonopyruvate decarboxylase fragment [Streptomyces coelicolor A3 2 ]
|WP_015870831.1|locus|NT01EI_RS06565|prediction_method|Predicted_by_at_least_one_method(IslandPath-DIMOB)	3	6.19e-38	type II restriction enzyme very EcoRII; endonuclease [Bifidobacterium longum NCC2705]
|WP_015872360.1|locus|NT01EI_RS13620|prediction_method|Predicted_by_at_least_one_method(IslandPath-DIMOB)	6	2.93e-37	bacteriophage protein [Ralstonia solanacearum GMI1000]
|WP_041730354.1|locus|NT01EI_RS06765|prediction_method|Predicted_by_at_least_one_method(IslandPath-DIMOB)	30	9.07e-37	IS1 orfA [Shigella flexneri 2a str. 2457T]
|WP_015871553.1|locus|NT01EI_RS09800|prediction_method|Predicted_by_at_least_one_method(Islander)	5	1.18e-36	major capsid-like protein [Salmonella enterica subsp. enterica serovar Typhimurium str. LT2]
|WP_015872398.1|locus|NT01EI_RS13805|prediction_method|Predicted_by_at_least_one_method(IslandPath-DIMOB)	25	1.57e-35	tetrathionate reductase complex subunit B [Salmonella typhimurium LT2]
|WP_015871589.1|locus|NT01EI_RS09990|prediction_method|Predicted_by_at_least_one_method(IslandPath-DIMOB)	8	7.96e-33	putative anti-termination protein [Escherichia coli O157:H7 str. Sakai]
|WP_015872297.1|locus|NT01EI_RS17450|prediction_method|Predicted_by_at_least_one_method(IslandPath-DIMOB)	52	5.29e-32	Hemolysin precursor
|WP_015869800.1|locus|NT01EI_RS01555|prediction_method|Predicted_by_at_least_one_method(Islander,IslandPath-DIMOB)	5	1.81e-31	hypothetical protein t4272 [Salmonella enterica subsp. enterica serovar Typhi str. Ty2]
|WP_015869800.1|locus|NT01EI_RS01555|prediction_method|Predicted_by_at_least_one_method(Islander,IslandPath-DIMOB)	5	1.81e-31	hypothetical protein t4272 [Salmonella enterica subsp. enterica serovar Typhi str. Ty2]
|WP_035609179.1|locus|NT01EI_RS14560|prediction_method|Predicted_by_at_least_one_method(IslandPath-DIMOB,SIGI-HMM)	66	4.79e-31	RecName: Full=Virulence membrane protein pagC; Flags: Precursor;
|WP_035609179.1|locus|NT01EI_RS14560|prediction_method|Predicted_by_at_least_one_method(IslandPath-DIMOB,SIGI-HMM)	66	4.79e-31	RecName: Full=Virulence membrane protein pagC; Flags: Precursor;
|WP_015869817.1|locus|NT01EI_RS01640|prediction_method|Predicted_by_at_least_one_method(Islander)	20	8.48e-31	hypothetical protein t4356 [Salmonella enterica subsp. enterica serovar Typhi str. Ty2]
|WP_015870827.1|locus|NT01EI_RS06545|prediction_method|Predicted_by_at_least_one_method(IslandPath-DIMOB)	27	1.05e-30	putative transcriptional regulator [Shigella flexneri 2a]
|WP_071525720.1|locus|NT01EI_RS17840|prediction_method|Predicted_by_at_least_one_method(IslandPath-DIMOB,SIGI-HMM)	4	1.63e-30	DNA mismatch endonuclease, patch repair protein [Sinorhizobium meliloti 1021]
|WP_071525720.1|locus|NT01EI_RS17840|prediction_method|Predicted_by_at_least_one_method(IslandPath-DIMOB,SIGI-HMM)	4	1.63e-30	DNA mismatch endonuclease, patch repair protein [Sinorhizobium meliloti 1021]
|WP_015872284.1|locus|NT01EI_RS13315|prediction_method|Predicted_by_at_least_one_method(IslandPath-DIMOB)	49	1.79e-30	attachment invasion locus protein [Yersinia pestis CO92]
|WP_015872299.1|locus|NT01EI_RS13380|prediction_method|Predicted_by_at_least_one_method(IslandPath-DIMOB)	13	1.23e-29	pyruvate formate lyase I [Salmonella enterica subsp. enterica serovar Typhimurium str. LT2]
|WP_015871552.1|locus|NT01EI_RS09795|prediction_method|Predicted_by_at_least_one_method(Islander)	5	1.25e-29	phage-related capsid scaffold protein [Xanthomonas campestris pv. campestris str. ATCC 33913]
|WP_071525754.1|locus|NT01EI_RS18320|prediction_method|Predicted_by_at_least_one_method(IslandPath-DIMOB)	57	1.35e-29	transposase, putative [Vibrio cholerae O1 biovar El Tor str. N16961]
|WP_015872369.1|locus|NT01EI_RS13670|prediction_method|Predicted_by_at_least_one_method(IslandPath-DIMOB)	8	1.46e-29	phage baseplate assembly-like protein [Ralstonia solanacearum GMI1000]
|WP_015870678.1|locus|NT01EI_RS05860|prediction_method|Predicted_by_at_least_one_method(IslandPath-DIMOB,SIGI-HMM)	144	2.25e-29	neuD protein [Streptococcus agalactiae 2603V/R]
|WP_015870678.1|locus|NT01EI_RS05860|prediction_method|Predicted_by_at_least_one_method(IslandPath-DIMOB,SIGI-HMM)	144	2.25e-29	neuD protein [Streptococcus agalactiae 2603V/R]
|WP_015871536.1|locus|NT01EI_RS09735|prediction_method|Predicted_by_at_least_one_method(IslandPath-DIMOB,SIGI-HMM,Islander)	6	5.59e-28	putative DNA-binding protein [Escherichia coli O157:H7 str. Sakai]
|WP_015871536.1|locus|NT01EI_RS09735|prediction_method|Predicted_by_at_least_one_method(IslandPath-DIMOB,SIGI-HMM,Islander)	6	5.59e-28	putative DNA-binding protein [Escherichia coli O157:H7 str. Sakai]
|WP_015871536.1|locus|NT01EI_RS09735|prediction_method|Predicted_by_at_least_one_method(IslandPath-DIMOB,SIGI-HMM,Islander)	6	5.59e-28	putative DNA-binding protein [Escherichia coli O157:H7 str. Sakai]
|WP_015870888.1|locus|NT01EI_RS06795|prediction_method|Predicted_by_at_least_one_method(IslandPath-DIMOB,SIGI-HMM)	59	3.38e-27	usher protein, P pilus assembly protein
|WP_015870888.1|locus|NT01EI_RS06795|prediction_method|Predicted_by_at_least_one_method(IslandPath-DIMOB,SIGI-HMM)	59	3.38e-27	usher protein, P pilus assembly protein
|WP_015871089.1|locus|NT01EI_RS07770|prediction_method|Predicted_by_at_least_one_method(IslandPath-DIMOB)	3	9.49e-27	fructose-bisphosphate aldolase [Streptococcus agalactiae NEM316]
|WP_015871568.1|locus|NT01EI_RS09880|prediction_method|Predicted_by_at_least_one_method(Islander)	14	2.78e-26	tail fiber assembly like-protein [Phage Gifsy-2]
|WP_071820494.1|locus|NT01EI_RS17925|prediction_method|Predicted_by_at_least_one_method(IslandPath-DIMOB)	7	3.14e-26	TIS1421-transposase protein A [Ralstonia solanacearum GMI1000]
|WP_071525706.1|locus|NT01EI_RS18780|prediction_method|Predicted_by_at_least_one_method(IslandPath-DIMOB)	4	3.43e-26	TIS1421-transposase protein A [Ralstonia solanacearum GMI1000]
|WP_015869768.1|locus|NT01EI_RS01395|prediction_method|Predicted_by_at_least_one_method(Islander,IslandPath-DIMOB)	5	7.98e-26	hypothetical protein t4230 [Salmonella enterica subsp. enterica serovar Typhi str. Ty2]
|WP_015869768.1|locus|NT01EI_RS01395|prediction_method|Predicted_by_at_least_one_method(Islander,IslandPath-DIMOB)	5	7.98e-26	hypothetical protein t4230 [Salmonella enterica subsp. enterica serovar Typhi str. Ty2]
|WP_015872374.1|locus|NT01EI_RS13690|prediction_method|Predicted_by_at_least_one_method(IslandPath-DIMOB)	9	1.07e-25	hypothetical protein lin0088 [Listeria innocua Clip11262]
|WP_071525704.1|locus|NT01EI_RS18520|prediction_method|Predicted_by_at_least_one_method(IslandPath-DIMOB)	57	1.29e-25	SubName: Full=Repressor protein;
|WP_015872365.1|locus|NT01EI_RS18630|prediction_method|Predicted_by_at_least_one_method(IslandPath-DIMOB)	15	2.82e-25	phage tail-like protein [Salmonella enterica subsp. enterica serovar Typhimurium str. LT2]
|WP_015870895.1|locus|NT01EI_RS06825|prediction_method|Predicted_by_at_least_one_method(IslandPath-DIMOB)	37	1.23e-24	truncated InsA protein [Escherichia coli]
|WP_035610231.1|locus|NT01EI_RS10065|prediction_method|Predicted_by_at_least_one_method(IslandPath-DIMOB)	7	1.36e-23	hypothetical protein STM2734 [Enterobacteria phage Fels-2]
|WP_015870854.1|locus|NT01EI_RS06655|prediction_method|Predicted_by_at_least_one_method(IslandPick)	13	3.45e-23	truncated InsA protein [Escherichia coli]
|WP_015870872.1|locus|NT01EI_RS06725|prediction_method|Predicted_by_at_least_one_method(IslandPath-DIMOB)	4	8.36e-23	CS7 fimbria major subunit CsvA precursor [Escherichia coli]
|WP_015872377.1|locus|NT01EI_RS13705|prediction_method|Predicted_by_at_least_one_method(IslandPath-DIMOB)	7	1.01e-22	hypothetical protein RSc1916 [Ralstonia solanacearum GMI1000]
|WP_015869776.1|locus|NT01EI_RS17575|prediction_method|Predicted_by_at_least_one_method(Islander,IslandPath-DIMOB)	4	4.82e-22	hypothetical protein t4236 [Salmonella enterica subsp. enterica serovar Typhi str. Ty2]
|WP_015869776.1|locus|NT01EI_RS17575|prediction_method|Predicted_by_at_least_one_method(Islander,IslandPath-DIMOB)	4	4.82e-22	hypothetical protein t4236 [Salmonella enterica subsp. enterica serovar Typhi str. Ty2]
|WP_015871970.1|locus|NT01EI_RS11720|prediction_method|Predicted_by_at_least_one_method(IslandPath-DIMOB,SIGI-HMM)	103	5.57e-22	ISxac3 transposase [Xanthomonas campestris pv. campestris str. ATCC 33913]
|WP_015871970.1|locus|NT01EI_RS11720|prediction_method|Predicted_by_at_least_one_method(IslandPath-DIMOB,SIGI-HMM)	103	5.57e-22	ISxac3 transposase [Xanthomonas campestris pv. campestris str. ATCC 33913]
|WP_015869796.1|locus|NT01EI_RS01535|prediction_method|Predicted_by_at_least_one_method(Islander,IslandPath-DIMOB)	3	2.44e-21	hypothetical protein t4271 [Salmonella enterica subsp. enterica serovar Typhi str. Ty2]
|WP_015869796.1|locus|NT01EI_RS01535|prediction_method|Predicted_by_at_least_one_method(Islander,IslandPath-DIMOB)	3	2.44e-21	hypothetical protein t4271 [Salmonella enterica subsp. enterica serovar Typhi str. Ty2]
|WP_015872543.1|locus|NT01EI_RS14565|prediction_method|Predicted_by_at_least_one_method(IslandPath-DIMOB,SIGI-HMM)	73	1.4e-20	RecName: Full=RTX-I toxin-activating lysine-acyltransferase ApxIC; EC=2.3.1.-; AltName: Full=RTX-I toxin determinant C; AltName: Full=APX-IC; AltName: Full=HLY-IC; AltName: Full=Cytolysin IC; Short=CLY-IC; AltName: Full=Toxin RTX-I-activating protein C;
|WP_015872543.1|locus|NT01EI_RS14565|prediction_method|Predicted_by_at_least_one_method(IslandPath-DIMOB,SIGI-HMM)	73	1.4e-20	RecName: Full=RTX-I toxin-activating lysine-acyltransferase ApxIC; EC=2.3.1.-; AltName: Full=RTX-I toxin determinant C; AltName: Full=APX-IC; AltName: Full=HLY-IC; AltName: Full=Cytolysin IC; Short=CLY-IC; AltName: Full=Toxin RTX-I-activating protein C;
|WP_015872292.1|locus|NT01EI_RS13335|prediction_method|Predicted_by_at_least_one_method(IslandPath-DIMOB)	45	1.87e-20	transposase [Escherichia coli CFT073]
|WP_015872260.1|locus|NT01EI_RS13185|prediction_method|Predicted_by_at_least_one_method(IslandPath-DIMOB)	28	2.32e-20	oxidoreductase [Xylella fastidiosa 9a5c]
|WP_015872857.1|locus|NT01EI_RS16210|prediction_method|Predicted_by_at_least_one_method(SIGI-HMM)	2	5.13e-20	hypothetical protein gbs0132 [Streptococcus agalactiae NEM316]
|WP_015869787.1|locus|NT01EI_RS01490|prediction_method|Predicted_by_at_least_one_method(Islander,IslandPath-DIMOB)	2	4.35e-19	hypothetical protein t4262 [Salmonella enterica subsp. enterica serovar Typhi str. Ty2]
|WP_015869787.1|locus|NT01EI_RS01490|prediction_method|Predicted_by_at_least_one_method(Islander,IslandPath-DIMOB)	2	4.35e-19	hypothetical protein t4262 [Salmonella enterica subsp. enterica serovar Typhi str. Ty2]
|WP_049640281.1|locus|NT01EI_RS14575|prediction_method|Predicted_by_at_least_one_method(IslandPath-DIMOB,SIGI-HMM)	7	8.51e-19	hypothetical protein S3177 [Shigella flexneri 2a str. 2457T]
|WP_049640281.1|locus|NT01EI_RS14575|prediction_method|Predicted_by_at_least_one_method(IslandPath-DIMOB,SIGI-HMM)	7	8.51e-19	hypothetical protein S3177 [Shigella flexneri 2a str. 2457T]
|WP_035610120.1|locus|NT01EI_RS13735|prediction_method|Predicted_by_at_least_one_method(IslandPath-DIMOB,IslandPick)	53	1.03e-18	hypothetical protein XCC2997 [Xanthomonas campestris pv. campestris str. ATCC 33913]
|WP_035610120.1|locus|NT01EI_RS13735|prediction_method|Predicted_by_at_least_one_method(IslandPath-DIMOB,IslandPick)	53	1.03e-18	hypothetical protein XCC2997 [Xanthomonas campestris pv. campestris str. ATCC 33913]
|WP_035609398.1|locus|NT01EI_RS06840|prediction_method|Predicted_by_at_least_one_method(IslandPath-DIMOB)	18	1.67e-18	hypothetical protein c1167 [Escherichia coli CFT073]
|WP_071525730.1|locus|NT01EI_RS18265|prediction_method|Predicted_by_at_least_one_method(IslandPath-DIMOB,Islander)	32	3.92e-18	hypothetical protein ECs2630 [Escherichia coli O157:H7 str. Sakai]
|WP_071525730.1|locus|NT01EI_RS18265|prediction_method|Predicted_by_at_least_one_method(IslandPath-DIMOB,Islander)	32	3.92e-18	hypothetical protein ECs2630 [Escherichia coli O157:H7 str. Sakai]
|WP_015871567.1|locus|NT01EI_RS18280|prediction_method|Predicted_by_at_least_one_method(Islander)	9	3.89e-17	putative tail fiber protein from prophage CP-933H [Escherichia coli O157:H7 EDL933]
|WP_015870672.1|locus|NT01EI_RS05830|prediction_method|Predicted_by_at_least_one_method(IslandPath-DIMOB,SIGI-HMM)	45	1.16e-16	epimerase/dehydratase
|WP_015870672.1|locus|NT01EI_RS05830|prediction_method|Predicted_by_at_least_one_method(IslandPath-DIMOB,SIGI-HMM)	45	1.16e-16	epimerase/dehydratase
|WP_015870682.1|locus|NT01EI_RS05880|prediction_method|Predicted_by_at_least_one_method(IslandPath-DIMOB,SIGI-HMM)	5	5.25e-16	polysaccharide biosynthesis protein CpsL [Streptococcus agalactiae 2603V/R]
|WP_015870682.1|locus|NT01EI_RS05880|prediction_method|Predicted_by_at_least_one_method(IslandPath-DIMOB,SIGI-HMM)	5	5.25e-16	polysaccharide biosynthesis protein CpsL [Streptococcus agalactiae 2603V/R]
|WP_015872230.1|locus|NT01EI_RS13035|prediction_method|Predicted_by_at_least_one_method(IslandPath-DIMOB)	42	5.87e-16	ISxac3 transposase [Xanthomonas axonopodis pv. citri str. 306]
|WP_015872261.1|locus|NT01EI_RS13190|prediction_method|Predicted_by_at_least_one_method(IslandPath-DIMOB)	7	6.02e-16	thioredoxin
|WP_071525729.1|locus|NT01EI_RS18260|prediction_method|Predicted_by_at_least_one_method(IslandPath-DIMOB,SIGI-HMM,Islander)	16	2.15e-15	putative DNA-binding repressor transcription regulator protein [Ralstonia solanacearum GMI1000]
|WP_071525729.1|locus|NT01EI_RS18260|prediction_method|Predicted_by_at_least_one_method(IslandPath-DIMOB,SIGI-HMM,Islander)	16	2.15e-15	putative DNA-binding repressor transcription regulator protein [Ralstonia solanacearum GMI1000]
|WP_071525729.1|locus|NT01EI_RS18260|prediction_method|Predicted_by_at_least_one_method(IslandPath-DIMOB,SIGI-HMM,Islander)	16	2.15e-15	putative DNA-binding repressor transcription regulator protein [Ralstonia solanacearum GMI1000]
|WP_015871570.1|locus|NT01EI_RS09890|prediction_method|Predicted_by_at_least_one_method(Islander)	5	2.91e-15	A/G-specific DNA glycosylase [Vibrio vulnificus CMCP6]
|WP_015871593.1|locus|NT01EI_RS10015|prediction_method|Predicted_by_at_least_one_method(IslandPath-DIMOB)	8	4.83e-15	antirepressor, putative [Enterococcus faecalis V583]
|WP_034168398.1|locus|NT01EI_RS13625|prediction_method|Predicted_by_at_least_one_method(IslandPath-DIMOB)	19	5.52e-15	phage-related tail protein [Xanthomonas campestris pv. campestris str. ATCC 33913]
|WP_015869803.1|locus|NT01EI_RS01570|prediction_method|Predicted_by_at_least_one_method(Islander,IslandPath-DIMOB,SIGI-HMM)	5	1.1e-14	hypothetical protein t4275 [Salmonella enterica subsp. enterica serovar Typhi str. Ty2]
|WP_015869803.1|locus|NT01EI_RS01570|prediction_method|Predicted_by_at_least_one_method(Islander,IslandPath-DIMOB,SIGI-HMM)	5	1.1e-14	hypothetical protein t4275 [Salmonella enterica subsp. enterica serovar Typhi str. Ty2]
|WP_015869803.1|locus|NT01EI_RS01570|prediction_method|Predicted_by_at_least_one_method(Islander,IslandPath-DIMOB,SIGI-HMM)	5	1.1e-14	hypothetical protein t4275 [Salmonella enterica subsp. enterica serovar Typhi str. Ty2]
|WP_015872302.1|locus|NT01EI_RS13390|prediction_method|Predicted_by_at_least_one_method(IslandPath-DIMOB)	20	1.33e-14	hypothetical protein gbs0095 [Streptococcus agalactiae NEM316]
|WP_015871088.1|locus|NT01EI_RS07765|prediction_method|Predicted_by_at_least_one_method(IslandPath-DIMOB)	17	1.93e-14	Carbohydrate/purine kinase, pfkB family
|WP_015872384.1|locus|NT01EI_RS18645|prediction_method|Predicted_by_at_least_one_method(IslandPath-DIMOB,IslandPick)	18	1.95e-14	putative transcriptional activator transcription regulator protein [Ralstonia solanacearum GMI1000]
|WP_015872384.1|locus|NT01EI_RS18645|prediction_method|Predicted_by_at_least_one_method(IslandPath-DIMOB,IslandPick)	18	1.95e-14	putative transcriptional activator transcription regulator protein [Ralstonia solanacearum GMI1000]
|WP_015871221.1|locus|NT01EI_RS08330|prediction_method|Predicted_by_at_least_one_method(SIGI-HMM)	13	6.64e-14	putative cell wall hydrolase; mobile element region [Bacillus subtilis subsp. subtilis str. 168]
|WP_015870833.1|locus|NT01EI_RS06575|prediction_method|Predicted_by_at_least_one_method(IslandPath-DIMOB,SIGI-HMM)	19	1.44e-13	ISxcc1 transposase [Xanthomonas campestris pv. campestris str. ATCC 33913]
|WP_015870833.1|locus|NT01EI_RS06575|prediction_method|Predicted_by_at_least_one_method(IslandPath-DIMOB,SIGI-HMM)	19	1.44e-13	ISxcc1 transposase [Xanthomonas campestris pv. campestris str. ATCC 33913]
|WP_015872289.1|locus|NT01EI_RS13330|prediction_method|Predicted_by_at_least_one_method(IslandPath-DIMOB)	3	1.9e-13	hypothetical protein c1207 [Escherichia coli CFT073]
|WP_015870861.1|locus|NT01EI_RS06680|prediction_method|Predicted_by_at_least_one_method(IslandPath-DIMOB)	14	2.28e-13	TIS1421-transposase protein A [Ralstonia solanacearum GMI1000]
|WP_015870670.1|locus|NT01EI_RS05825|prediction_method|Predicted_by_at_least_one_method(IslandPath-DIMOB,SIGI-HMM)	32	7.76e-13	alpha 1,2 N-acetylglucosamine transferase [Neisseria meningitidis MC58]
|WP_015870670.1|locus|NT01EI_RS05825|prediction_method|Predicted_by_at_least_one_method(IslandPath-DIMOB,SIGI-HMM)	32	7.76e-13	alpha 1,2 N-acetylglucosamine transferase [Neisseria meningitidis MC58]
|WP_035609284.1|locus|NT01EI_RS06790|prediction_method|Predicted_by_at_least_one_method(IslandPath-DIMOB)	25	1.36e-12	chaperone, P pilus assembly protein
|WP_049640874.1|locus|NT01EI_RS08990|prediction_method|Predicted_by_at_least_one_method(SIGI-HMM)	4	4.41e-12	urease accessory protein ureH [Helicobacter pylori 26695]
|WP_071525759.1|locus|NT01EI_RS18285|prediction_method|Predicted_by_at_least_one_method(Islander)	29	1.7e-11	RecName: Full=Protein hokC; AltName: Full=Protein gef;
|WP_035608836.1|locus|NT01EI_RS01450|prediction_method|Predicted_by_at_least_one_method(Islander,IslandPath-DIMOB)	8	2.12e-11	hypothetical protein t4255 [Salmonella enterica subsp. enterica serovar Typhi str. Ty2]
|WP_035608836.1|locus|NT01EI_RS01450|prediction_method|Predicted_by_at_least_one_method(Islander,IslandPath-DIMOB)	8	2.12e-11	hypothetical protein t4255 [Salmonella enterica subsp. enterica serovar Typhi str. Ty2]
|WP_015871591.1|locus|NT01EI_RS10005|prediction_method|Predicted_by_at_least_one_method(IslandPath-DIMOB)	2	4.54e-11	putative phage replication protein [Escherichia coli O157:H7 str. Sakai]
|WP_071525742.1|locus|NT01EI_RS18695|prediction_method|Predicted_by_at_least_one_method(IslandPath-DIMOB,IslandPick)	11	4.89e-11	secretion chaperone [Salmonella typhimurium LT2]
|WP_071525742.1|locus|NT01EI_RS18695|prediction_method|Predicted_by_at_least_one_method(IslandPath-DIMOB,IslandPick)	11	4.89e-11	secretion chaperone [Salmonella typhimurium LT2]
|WP_015871563.1|locus|NT01EI_RS09850|prediction_method|Predicted_by_at_least_one_method(Islander)	8	1.88e-10	phage tail-like protein [Salmonella enterica subsp. enterica serovar Typhimurium str. LT2]
|WP_071525712.1|locus|NT01EI_RS17935|prediction_method|Predicted_by_at_least_one_method(IslandPath-DIMOB,SIGI-HMM)	3	2.33e-10	TIS1421-transposase protein A [Ralstonia solanacearum GMI1000]
|WP_071525712.1|locus|NT01EI_RS17935|prediction_method|Predicted_by_at_least_one_method(IslandPath-DIMOB,SIGI-HMM)	3	2.33e-10	TIS1421-transposase protein A [Ralstonia solanacearum GMI1000]
|WP_015872653.1|locus|NT01EI_RS15065|prediction_method|Predicted_by_at_least_one_method(IslandPath-DIMOB)	5	2.81e-10	hypothetical protein VC1768 [Vibrio cholerae O1 biovar El Tor str. N16961]
|WP_015872233.1|locus|NT01EI_RS13050|prediction_method|Predicted_by_at_least_one_method(IslandPath-DIMOB)	5	2.84e-10	putative lipoprotein [Salmonella enterica subsp. enterica serovar Typhi str. Ty2]
|WP_071525748.1|locus|NT01EI_RS18635|prediction_method|Predicted_by_at_least_one_method(IslandPath-DIMOB)	9	2.98e-10	hypothetical protein XCC2991 [Xanthomonas campestris pv. campestris str. ATCC 33913]
|WP_015872362.1|locus|NT01EI_RS13635|prediction_method|Predicted_by_at_least_one_method(IslandPath-DIMOB)	15	3.69e-10	putative phage-related transmembrane protein [Ralstonia solanacearum GMI1000]
|WP_035608573.1|locus|NT01EI_RS16225|prediction_method|Predicted_by_at_least_one_method(SIGI-HMM)	12	4.47e-10	bifunctional adhesin/ABC transporter aspartate/glutamate-binding protein [Campylobacter jejuni subsp. jejuni NCTC 11168]
|WP_015871554.1|locus|NT01EI_RS09805|prediction_method|Predicted_by_at_least_one_method(Islander)	7	7.68e-10	phage-related terminase [Xanthomonas campestris pv. campestris str. ATCC 33913]
|WP_015872521.1|locus|NT01EI_RS14450|prediction_method|Predicted_by_at_least_one_method(IslandPath-DIMOB,IslandPick)	10	9.64e-10	mutT-like protein [Streptomyces coelicolor A3 2 ]
|WP_015872521.1|locus|NT01EI_RS14450|prediction_method|Predicted_by_at_least_one_method(IslandPath-DIMOB,IslandPick)	10	9.64e-10	mutT-like protein [Streptomyces coelicolor A3 2 ]
|WP_015872361.1|locus|NT01EI_RS13630|prediction_method|Predicted_by_at_least_one_method(IslandPath-DIMOB)	12	2.56e-09	phage-like transmembrane protein [Ralstonia solanacearum GMI1000]
|WP_015870669.1|locus|NT01EI_RS05820|prediction_method|Predicted_by_at_least_one_method(IslandPath-DIMOB,SIGI-HMM)	14	6.6e-09	lipooligosaccharide biosynthesis protein [Haemophilus influenzae Rd KW20]
|WP_015870669.1|locus|NT01EI_RS05820|prediction_method|Predicted_by_at_least_one_method(IslandPath-DIMOB,SIGI-HMM)	14	6.6e-09	lipooligosaccharide biosynthesis protein [Haemophilus influenzae Rd KW20]
|WP_015872222.1|locus|NT01EI_RS13000|prediction_method|Predicted_by_at_least_one_method(IslandPath-DIMOB)	11	1.36e-08	hypothetical protein c1248 [Escherichia coli CFT073]
|WP_015870671.1|locus|NT01EI_RS17785|prediction_method|Predicted_by_at_least_one_method(IslandPath-DIMOB,SIGI-HMM)	16	5.55e-08	capsular polysaccharide biosynthesis protein Cps4H [Streptococcus pneumoniae TIGR4]
|WP_015870671.1|locus|NT01EI_RS17785|prediction_method|Predicted_by_at_least_one_method(IslandPath-DIMOB,SIGI-HMM)	16	5.55e-08	capsular polysaccharide biosynthesis protein Cps4H [Streptococcus pneumoniae TIGR4]
|WP_015871092.1|locus|NT01EI_RS07785|prediction_method|Predicted_by_at_least_one_method(IslandPath-DIMOB)	104	2.96e-07	putative sialic acid transporter [Escherichia coli CFT073]
|WP_035609278.1|locus|NT01EI_RS06800|prediction_method|Predicted_by_at_least_one_method(IslandPath-DIMOB,SIGI-HMM)	15	4.36e-07	TIS1421-transposase protein B [Ralstonia solanacearum GMI1000]
|WP_035609278.1|locus|NT01EI_RS06800|prediction_method|Predicted_by_at_least_one_method(IslandPath-DIMOB,SIGI-HMM)	15	4.36e-07	TIS1421-transposase protein B [Ralstonia solanacearum GMI1000]
|WP_015869815.1|locus|NT01EI_RS01625|prediction_method|Predicted_by_at_least_one_method(Islander,SIGI-HMM)	45	4.75e-07	hypothetical protein [Escherichia coli]
|WP_015869815.1|locus|NT01EI_RS01625|prediction_method|Predicted_by_at_least_one_method(Islander,SIGI-HMM)	45	4.75e-07	hypothetical protein [Escherichia coli]
|WP_015872859.1|locus|NT01EI_RS16220|prediction_method|Predicted_by_at_least_one_method(SIGI-HMM)	4	5.84e-07	hypothetical protein gbs0132 [Streptococcus agalactiae NEM316]
|WP_015871555.1|locus|NT01EI_RS09810|prediction_method|Predicted_by_at_least_one_method(Islander)	6	7.12e-07	head completion-like protein [Salmonella enterica subsp. enterica serovar Typhimurium str. LT2]
|WP_071525763.1|locus|NT01EI_RS14485|prediction_method|Predicted_by_at_least_one_method(IslandPath-DIMOB,IslandPick)	2	9.77e-07	hypothetical protein c1207 [Escherichia coli CFT073]
|WP_071525763.1|locus|NT01EI_RS14485|prediction_method|Predicted_by_at_least_one_method(IslandPath-DIMOB,IslandPick)	2	9.77e-07	hypothetical protein c1207 [Escherichia coli CFT073]
|WP_015872388.1|locus|NT01EI_RS13760|prediction_method|Predicted_by_at_least_one_method(IslandPath-DIMOB,IslandPick)	41	2.49e-06	hypothetical protein RSc1897 [Ralstonia solanacearum GMI1000]
|WP_015872388.1|locus|NT01EI_RS13760|prediction_method|Predicted_by_at_least_one_method(IslandPath-DIMOB,IslandPick)	41	2.49e-06	hypothetical protein RSc1897 [Ralstonia solanacearum GMI1000]
|WP_071525749.1|locus|NT01EI_RS18595|prediction_method|Predicted_by_at_least_one_method(IslandPath-DIMOB,SIGI-HMM)	93	8.66e-06	subtilisin-like protease [Toxoplasma gondii]
|WP_071525749.1|locus|NT01EI_RS18595|prediction_method|Predicted_by_at_least_one_method(IslandPath-DIMOB,SIGI-HMM)	93	8.66e-06	subtilisin-like protease [Toxoplasma gondii]
|WP_015869788.1|locus|NT01EI_RS01495|prediction_method|Predicted_by_at_least_one_method(Islander,IslandPath-DIMOB)	2	9.85e-06	hypothetical protein t4263 [Salmonella enterica subsp. enterica serovar Typhi str. Ty2]
|WP_015869788.1|locus|NT01EI_RS01495|prediction_method|Predicted_by_at_least_one_method(Islander,IslandPath-DIMOB)	2	9.85e-06	hypothetical protein t4263 [Salmonella enterica subsp. enterica serovar Typhi str. Ty2]
|WP_015872649.1|locus|NT01EI_RS15045|prediction_method|Predicted_by_at_least_one_method(IslandPath-DIMOB)	9	2.96e-05	hypothetical protein bll5011 [Bradyrhizobium japonicum USDA 110]
|WP_015871547.1|locus|NT01EI_RS18275|prediction_method|Predicted_by_at_least_one_method(IslandPath-DIMOB,Islander)	15	4.2e-05	hypothetical protein [Klebsiella oxytoca]
|WP_015871547.1|locus|NT01EI_RS18275|prediction_method|Predicted_by_at_least_one_method(IslandPath-DIMOB,Islander)	15	4.2e-05	hypothetical protein [Klebsiella oxytoca]
|WP_015872391.1|locus|NT01EI_RS13770|prediction_method|Predicted_by_at_least_one_method(IslandPath-DIMOB)	28	6.05e-05	SubName: Full=Carbamoyl-phosphate synthase small chain; EC=6.3.5.5;
|WP_015871544.1|locus|NT01EI_RS09770|prediction_method|Predicted_by_at_least_one_method(IslandPath-DIMOB,Islander)|annotations|PAG	6	6.21e-05	hypothetical protein ECs2632 [Escherichia coli O157:H7 str. Sakai]
|WP_015871544.1|locus|NT01EI_RS09770|prediction_method|Predicted_by_at_least_one_method(IslandPath-DIMOB,Islander)|annotations|PAG	6	6.21e-05	hypothetical protein ECs2632 [Escherichia coli O157:H7 str. Sakai]
|WP_015872856.1|locus|NT01EI_RS16205|prediction_method|Predicted_by_at_least_one_method(SIGI-HMM)	5	8.34e-05	bifunctional adhesin/ABC transporter aspartate/glutamate-binding protein [Campylobacter jejuni subsp. jejuni NCTC 11168]
|WP_015872531.1|locus|NT01EI_RS14505|prediction_method|Predicted_by_at_least_one_method(IslandPath-DIMOB)	9	0.000121	hypothetical protein [Escherichia coli]
|WP_012848252.1|locus|NT01EI_RS06845|prediction_method|Predicted_by_at_least_one_method(IslandPath-DIMOB)	21	0.000265	ferrous iron transporter B [Legionella pneumophila subsp. pneumophila str. Philadelphia 1]
|WP_015872304.1|locus|NT01EI_RS13400|prediction_method|Predicted_by_at_least_one_method(IslandPath-DIMOB)	13	0.000463	hypothetical protein blr1666 [Bradyrhizobium japonicum USDA 110]
|WP_015871529.1|locus|NT01EI_RS18255|prediction_method|Predicted_by_at_least_one_method(IslandPath-DIMOB)	6	0.000881	hypothetical protein PP_3919 [Pseudomonas putida KT2440]
|WP_015871219.1|locus|NT01EI_RS08325|prediction_method|Predicted_by_at_least_one_method(SIGI-HMM)	3	0.000969	diaminopropionate ammonia-lyase [Salmonella enterica subsp. enterica serovar Typhimurium str. LT2]
|WP_015870881.1|locus|NT01EI_RS06760|prediction_method|Predicted_by_at_least_one_method(IslandPath-DIMOB)	4	0.00483	RecName: Full=Venom carboxylesterase-6; EC=3.1.1.1; AltName: Allergen=Api m 8; Flags: Precursor;
|WP_015872366.1|locus|NT01EI_RS13655|prediction_method|Predicted_by_at_least_one_method(IslandPath-DIMOB)	14	0.01	Cro/CI family transcriptional regulator [Streptococcus agalactiae 2603V/R]
|WP_015870868.1|locus|NT01EI_RS06720|prediction_method|Predicted_by_at_least_one_method(IslandPath-DIMOB)	28	0.02	SubName: Full=Delta toxin;
|WP_015872381.1|locus|NT01EI_RS13725|prediction_method|Predicted_by_at_least_one_method(IslandPath-DIMOB)	6	0.02	Ferrichrome-binding protein [Bacillus cereus ATCC 14579]
|WP_035609506.1|locus|NT01EI_RS14455|prediction_method|Predicted_by_at_least_one_method(IslandPath-DIMOB,IslandPick)|annotations|PAG	64	0.03	VirB4 [Campylobacter jejuni subsp. jejuni 81-176]
|WP_035609506.1|locus|NT01EI_RS14455|prediction_method|Predicted_by_at_least_one_method(IslandPath-DIMOB,IslandPick)|annotations|PAG	64	0.03	VirB4 [Campylobacter jejuni subsp. jejuni 81-176]
|WP_015871535.1|locus|NT01EI_RS09730|prediction_method|Predicted_by_at_least_one_method(IslandPath-DIMOB,SIGI-HMM,Islander)|annotations|PAG	12	0.04	trans-sialidase [Trypanosoma cruzi strain CL Brener]
|WP_015871535.1|locus|NT01EI_RS09730|prediction_method|Predicted_by_at_least_one_method(IslandPath-DIMOB,SIGI-HMM,Islander)|annotations|PAG	12	0.04	trans-sialidase [Trypanosoma cruzi strain CL Brener]
|WP_015871535.1|locus|NT01EI_RS09730|prediction_method|Predicted_by_at_least_one_method(IslandPath-DIMOB,SIGI-HMM,Islander)|annotations|PAG	12	0.04	trans-sialidase [Trypanosoma cruzi strain CL Brener]
|WP_015872657.1|locus|NT01EI_RS15080|prediction_method|Predicted_by_at_least_one_method(IslandPath-DIMOB)	20	0.04	putative DNA-binding repressor transcription regulator protein [Ralstonia solanacearum GMI1000]
|WP_015871218.1|locus|NT01EI_RS08320|prediction_method|Predicted_by_at_least_one_method(SIGI-HMM)	4	0.04	Upf54.4 protein [uncultured bacterium]
|WP_015870667.1|locus|NT01EI_RS05810|prediction_method|Predicted_by_at_least_one_method(IslandPath-DIMOB,SIGI-HMM)	2	0.05	hypothetical protein YE3082 [Yersinia enterocolitica subsp. enterocolitica 8081]
|WP_015870667.1|locus|NT01EI_RS05810|prediction_method|Predicted_by_at_least_one_method(IslandPath-DIMOB,SIGI-HMM)	2	0.05	hypothetical protein YE3082 [Yersinia enterocolitica subsp. enterocolitica 8081]
|WP_015872520.1|locus|NT01EI_RS14440|prediction_method|Predicted_by_at_least_one_method(IslandPath-DIMOB)	4	0.07	RecName: Full=Periplasmic zinc-binding protein troA; AltName: Full=Tromp-1; Flags: Precursor;
|WP_015870684.1|locus|NT01EI_RS05890|prediction_method|Predicted_by_at_least_one_method(IslandPath-DIMOB)	4	0.08	two-component sensor histidine kinase [Mesorhizobium loti MAFF303099]
|WP_035610137.1|locus|NT01EI_RS13410|prediction_method|Predicted_by_at_least_one_method(IslandPath-DIMOB)	7	0.08	regulatory protein [Streptomyces coelicolor A3 2 ]
|WP_015869789.1|locus|NT01EI_RS01500|prediction_method|Predicted_by_at_least_one_method(Islander,IslandPath-DIMOB)	2	0.08	hypothetical protein t4264 [Salmonella enterica subsp. enterica serovar Typhi str. Ty2]
|WP_015869789.1|locus|NT01EI_RS01500|prediction_method|Predicted_by_at_least_one_method(Islander,IslandPath-DIMOB)	2	0.08	hypothetical protein t4264 [Salmonella enterica subsp. enterica serovar Typhi str. Ty2]
|WP_015871217.1|locus|NT01EI_RS08315|prediction_method|Predicted_by_at_least_one_method(SIGI-HMM)	11	0.12	SubName: Full=Type III secretion chaperone SycD;
|WP_015871542.1|locus|NT01EI_RS09760|prediction_method|Predicted_by_at_least_one_method(IslandPath-DIMOB,Islander)	10	0.12	hypothetical protein lin2600 [Listeria innocua Clip11262]
|WP_015871542.1|locus|NT01EI_RS09760|prediction_method|Predicted_by_at_least_one_method(IslandPath-DIMOB,Islander)	10	0.12	hypothetical protein lin2600 [Listeria innocua Clip11262]
|WP_035610139.1|locus|NT01EI_RS13375|prediction_method|Predicted_by_at_least_one_method(IslandPath-DIMOB)	4	0.14	SubName: Full=Putative serine protease Putative membrane protein ;
|WP_015871571.1|locus|NT01EI_RS09895|prediction_method|Predicted_by_at_least_one_method(Islander)	15	0.15	RecName: Full=Preprotein translocase subunit secY;
|WP_035609840.1|locus|NT01EI_RS09780|prediction_method|Predicted_by_at_least_one_method(IslandPath-DIMOB,Islander)	8	0.2	putative transcriptional activator transcription regulator protein [Ralstonia solanacearum GMI1000]
|WP_035609840.1|locus|NT01EI_RS09780|prediction_method|Predicted_by_at_least_one_method(IslandPath-DIMOB,Islander)	8	0.2	putative transcriptional activator transcription regulator protein [Ralstonia solanacearum GMI1000]
|WP_015870826.1|locus|NT01EI_RS06535|prediction_method|Predicted_by_at_least_one_method(IslandPath-DIMOB)	24	0.22	RecName: Full=Urease subunit alpha; EC=3.5.1.5;
|WP_035608428.1|locus|NT01EI_RS10000|prediction_method|Predicted_by_at_least_one_method(IslandPath-DIMOB)	5	0.23	hypothetical protein c3191 [Escherichia coli CFT073]
|WP_071820492.1|locus|NT01EI_RS17885|prediction_method|Predicted_by_at_least_one_method(IslandPath-DIMOB)	6	0.23	SubName: Full=LSDV142 putative secreted virulence factor;
|WP_041730623.1|locus|NT01EI_RS01585|prediction_method|Predicted_by_at_least_one_method(Islander,IslandPath-DIMOB)	5	0.28	catalase-peroxidase
|WP_041730623.1|locus|NT01EI_RS01585|prediction_method|Predicted_by_at_least_one_method(Islander,IslandPath-DIMOB)	5	0.28	catalase-peroxidase
|WP_015871526.1|locus|NT01EI_RS09680|prediction_method|Predicted_by_at_least_one_method(IslandPath-DIMOB)	7	0.29	variant surface glycoprotein [Trypanosoma brucei TREU927]
|WP_015872315.1|locus|NT01EI_RS13440|prediction_method|Predicted_by_at_least_one_method(IslandPath-DIMOB,SIGI-HMM)	2	0.29	molybdenum cofactor biosynthesis protein A, putative [Pseudomonas putida KT2440]
|WP_015872315.1|locus|NT01EI_RS13440|prediction_method|Predicted_by_at_least_one_method(IslandPath-DIMOB,SIGI-HMM)	2	0.29	molybdenum cofactor biosynthesis protein A, putative [Pseudomonas putida KT2440]
|WP_071525680.1|locus|NT01EI_RS17590|prediction_method|Predicted_by_at_least_one_method(Islander,IslandPath-DIMOB)	14	0.35	hypothetical protein c3658 [Escherichia coli CFT073]
|WP_071525680.1|locus|NT01EI_RS17590|prediction_method|Predicted_by_at_least_one_method(Islander,IslandPath-DIMOB)	14	0.35	hypothetical protein c3658 [Escherichia coli CFT073]
|WP_035608846.1|locus|NT01EI_RS01485|prediction_method|Predicted_by_at_least_one_method(Islander,IslandPath-DIMOB)|annotations|PAG	2	0.36	RecName: Full=Type 4 prepilin-like proteins leader peptide-processing enzyme; Includes: RecName: Full=Leader peptidase; EC=3.4.23.43; AltName: Full=Prepilin peptidase; RecName: Full=N-methyltransferase; EC=2.1.1.-;
|WP_035608846.1|locus|NT01EI_RS01485|prediction_method|Predicted_by_at_least_one_method(Islander,IslandPath-DIMOB)|annotations|PAG	2	0.36	RecName: Full=Type 4 prepilin-like proteins leader peptide-processing enzyme; Includes: RecName: Full=Leader peptidase; EC=3.4.23.43; AltName: Full=Prepilin peptidase; RecName: Full=N-methyltransferase; EC=2.1.1.-;
|WP_015870865.1|locus|NT01EI_RS06705|prediction_method|Predicted_by_at_least_one_method(IslandPath-DIMOB)	4	0.37	hypothetical protein [Escherichia coli O157:H7]
|WP_015871538.1|locus|NT01EI_RS09745|prediction_method|Predicted_by_at_least_one_method(IslandPath-DIMOB,SIGI-HMM,Islander)	8	0.38	cystine knot toxin [Chilobrachys guangxiensis]
|WP_015871538.1|locus|NT01EI_RS09745|prediction_method|Predicted_by_at_least_one_method(IslandPath-DIMOB,SIGI-HMM,Islander)	8	0.38	cystine knot toxin [Chilobrachys guangxiensis]
|WP_015871538.1|locus|NT01EI_RS09745|prediction_method|Predicted_by_at_least_one_method(IslandPath-DIMOB,SIGI-HMM,Islander)	8	0.38	cystine knot toxin [Chilobrachys guangxiensis]
|WP_015871537.1|locus|NT01EI_RS09740|prediction_method|Predicted_by_at_least_one_method(IslandPath-DIMOB,SIGI-HMM,Islander)	3	0.39	protein gp10 [Listeria innocua Clip11262]
|WP_015871537.1|locus|NT01EI_RS09740|prediction_method|Predicted_by_at_least_one_method(IslandPath-DIMOB,SIGI-HMM,Islander)	3	0.39	protein gp10 [Listeria innocua Clip11262]
|WP_015871537.1|locus|NT01EI_RS09740|prediction_method|Predicted_by_at_least_one_method(IslandPath-DIMOB,SIGI-HMM,Islander)	3	0.39	protein gp10 [Listeria innocua Clip11262]
|WP_015872396.1|locus|NT01EI_RS13795|prediction_method|Predicted_by_at_least_one_method(IslandPath-DIMOB)	1	0.4	iron compound ABC transporter, permease protein [Bacillus anthracis str. Ames]
|WP_015869814.1|locus|NT01EI_RS01620|prediction_method|Predicted_by_at_least_one_method(Islander,SIGI-HMM)	4	0.41	succinic-semialdehyde dehydrogenase, putative [Pseudomonas putida KT2440]
|WP_015869814.1|locus|NT01EI_RS01620|prediction_method|Predicted_by_at_least_one_method(Islander,SIGI-HMM)	4	0.41	succinic-semialdehyde dehydrogenase, putative [Pseudomonas putida KT2440]
|WP_015872651.1|locus|NT01EI_RS15055|prediction_method|Predicted_by_at_least_one_method(IslandPath-DIMOB)	3	0.42	RecName: Full=Non-structural polyprotein; AltName: Full=Polyprotein nsP1234; Short=P1234; Contains: RecName: Full=P123; RecName: Full=P123'; RecName: Full=mRNA-capping enzyme nsP1; EC=2.1.1.-; EC=2.7.7.-; AltName: Full=Non-structural protein 1; RecName: F
|WP_015872655.1|locus|NT01EI_RS15075|prediction_method|Predicted_by_at_least_one_method(IslandPath-DIMOB)	9	0.43	hypothetical protein ECs1337 [Escherichia coli O157:H7 str. Sakai]
|WP_015872295.1|locus|NT01EI_RS13350|prediction_method|Predicted_by_at_least_one_method(IslandPath-DIMOB)	2	0.45	hypothetical protein SE1495 [Staphylococcus epidermidis ATCC 12228]
|WP_015872263.1|locus|NT01EI_RS13205|prediction_method|Predicted_by_at_least_one_method(IslandPath-DIMOB)	3	0.46	hypothetical protein PP_3857 [Pseudomonas putida KT2440]
|WP_015872290.1|locus|NT01EI_RS18570|prediction_method|Predicted_by_at_least_one_method(IslandPath-DIMOB)	7	0.49	SubName: Full=Latent membrane protein 2A;
|WP_071525665.1|locus|NT01EI_RS18305|prediction_method|Predicted_by_at_least_one_method(IslandPath-DIMOB)	2	0.5	SubName: Full=HrcC protein; Flags: Precursor;
|WP_035609494.1|locus|NT01EI_RS01375|prediction_method|Predicted_by_at_least_one_method(SIGI-HMM,Islander)	6	0.53	hypothetical protein y1892 [Yersinia pestis KIM]
|WP_035609494.1|locus|NT01EI_RS01375|prediction_method|Predicted_by_at_least_one_method(SIGI-HMM,Islander)	6	0.53	hypothetical protein y1892 [Yersinia pestis KIM]
|WP_071525747.1|locus|NT01EI_RS13385|prediction_method|Predicted_by_at_least_one_method(IslandPath-DIMOB)	12	0.56	SubName: Full=ExpD2; SubName: Full=Putative membrane-fusion protein WgdB Formerly ExpD2 ;
|WP_035610188.1|locus|NT01EI_RS13030|prediction_method|Predicted_by_at_least_one_method(IslandPath-DIMOB)	40	0.59	SubName: Full=Putative EEV host-range protein;
|WP_015869790.1|locus|NT01EI_RS01505|prediction_method|Predicted_by_at_least_one_method(Islander,IslandPath-DIMOB)	3	0.6	SubName: Full=Transcriptional activator of the acetoin dehydrogenase operon;
|WP_015869790.1|locus|NT01EI_RS01505|prediction_method|Predicted_by_at_least_one_method(Islander,IslandPath-DIMOB)	3	0.6	SubName: Full=Transcriptional activator of the acetoin dehydrogenase operon;
|WP_035608425.1|locus|NT01EI_RS10020|prediction_method|Predicted_by_at_least_one_method(IslandPath-DIMOB)	9	0.6	DNA polymerase beta family protein [Bradyrhizobium japonicum USDA 110]
|WP_035608735.1|locus|NT01EI_RS14515|prediction_method|Predicted_by_at_least_one_method(IslandPath-DIMOB)	7	0.62	RecName: Full=Alkaline proteinase inhibitor; Flags: Precursor;
|WP_015871559.1|locus|NT01EI_RS09830|prediction_method|Predicted_by_at_least_one_method(Islander)	4	0.67	toxomepsin 2 [Toxoplasma gondii]
|WP_015871558.1|locus|NT01EI_RS09825|prediction_method|Predicted_by_at_least_one_method(Islander)	5	0.69	CS6 structural subunit A [Escherichia coli]
|WP_015871525.1|locus|NT01EI_RS09675|prediction_method|Predicted_by_at_least_one_method(IslandPath-DIMOB)	1	0.76	terminase, large subunit, putative [Enterococcus faecalis V583]
|WP_035610200.1|locus|NT01EI_RS13180|prediction_method|Predicted_by_at_least_one_method(IslandPath-DIMOB)	6	0.77	putative tail assembly protein [Escherichia coli O157:H7 str. Sakai]
|WP_015872219.1|locus|NT01EI_RS12990|prediction_method|Predicted_by_at_least_one_method(IslandPath-DIMOB)	5	0.79	No definition line
|WP_015869765.1|locus|NT01EI_RS01380|prediction_method|Predicted_by_at_least_one_method(SIGI-HMM,Islander)|annotations|PAG	4	0.82	cytadherence accessory protein HMW1 [Mycoplasma pneumoniae M129]
|WP_015869765.1|locus|NT01EI_RS01380|prediction_method|Predicted_by_at_least_one_method(SIGI-HMM,Islander)|annotations|PAG	4	0.82	cytadherence accessory protein HMW1 [Mycoplasma pneumoniae M129]
|WP_015872367.1|locus|NT01EI_RS13660|prediction_method|Predicted_by_at_least_one_method(IslandPath-DIMOB)	6	0.83	hypothetical protein c1207 [Escherichia coli CFT073]
|WP_071525751.1|locus|NT01EI_RS18580|prediction_method|Predicted_by_at_least_one_method(IslandPath-DIMOB)	5	0.84	two-component sensor histidine kinase [Mesorhizobium loti MAFF303099]
|WP_035609837.1|locus|NT01EI_RS09750|prediction_method|Predicted_by_at_least_one_method(IslandPath-DIMOB,SIGI-HMM,Islander)	5	0.86	inhibitor of growth protein SidF [Legionella pneumophila subsp. pneumophila str. Philadelphia 1]
|WP_035609837.1|locus|NT01EI_RS09750|prediction_method|Predicted_by_at_least_one_method(IslandPath-DIMOB,SIGI-HMM,Islander)	5	0.86	inhibitor of growth protein SidF [Legionella pneumophila subsp. pneumophila str. Philadelphia 1]
|WP_035609837.1|locus|NT01EI_RS09750|prediction_method|Predicted_by_at_least_one_method(IslandPath-DIMOB,SIGI-HMM,Islander)	5	0.86	inhibitor of growth protein SidF [Legionella pneumophila subsp. pneumophila str. Philadelphia 1]
|WP_035609590.1|locus|NT01EI_RS06550|prediction_method|Predicted_by_at_least_one_method(IslandPath-DIMOB)	7	0.87	putative outer membrane protein of prophage [Escherichia coli CFT073]
|WP_071525753.1|locus|NT01EI_RS18530|prediction_method|Predicted_by_at_least_one_method(IslandPath-DIMOB)	4	0.91	truncated InsA protein [Escherichia coli]
|WP_015869799.1|locus|NT01EI_RS01550|prediction_method|Predicted_by_at_least_one_method(Islander,IslandPath-DIMOB)	5	0.92	type I restriction-modification enzyme R subunit [Nostoc sp. PCC 7120]
|WP_015869799.1|locus|NT01EI_RS01550|prediction_method|Predicted_by_at_least_one_method(Islander,IslandPath-DIMOB)	5	0.92	type I restriction-modification enzyme R subunit [Nostoc sp. PCC 7120]
|WP_015871600.1|locus|NT01EI_RS10050|prediction_method|Predicted_by_at_least_one_method(IslandPath-DIMOB)	14	0.92	hypothetical protein blr0871 [Bradyrhizobium japonicum USDA 110]
|WP_015871541.1|locus|NT01EI_RS09755|prediction_method|Predicted_by_at_least_one_method(IslandPath-DIMOB,Islander)|annotations|PAG	13	0.96	putative transposase number 1 for insertion sequence ISRM27 [Sinorhizobium meliloti 1021]
|WP_015871541.1|locus|NT01EI_RS09755|prediction_method|Predicted_by_at_least_one_method(IslandPath-DIMOB,Islander)|annotations|PAG	13	0.96	putative transposase number 1 for insertion sequence ISRM27 [Sinorhizobium meliloti 1021]
|WP_015870883.1|locus|NT01EI_RS06770|prediction_method|Predicted_by_at_least_one_method(IslandPath-DIMOB)	21	1.03	OqxB [Burkholderia mallei GB8 horse 4]
|WP_015869805.1|locus|NT01EI_RS01580|prediction_method|Predicted_by_at_least_one_method(Islander,IslandPath-DIMOB,SIGI-HMM)	3	1.03	CP4-6 prophage; predicted DNA-binding transcriptional regulator [Escherichia coli str. K-12 substr. MG1655]
|WP_015869805.1|locus|NT01EI_RS01580|prediction_method|Predicted_by_at_least_one_method(Islander,IslandPath-DIMOB,SIGI-HMM)	3	1.03	CP4-6 prophage; predicted DNA-binding transcriptional regulator [Escherichia coli str. K-12 substr. MG1655]
|WP_015869805.1|locus|NT01EI_RS01580|prediction_method|Predicted_by_at_least_one_method(Islander,IslandPath-DIMOB,SIGI-HMM)	3	1.03	CP4-6 prophage; predicted DNA-binding transcriptional regulator [Escherichia coli str. K-12 substr. MG1655]
|WP_015870876.1|locus|NT01EI_RS06745|prediction_method|Predicted_by_at_least_one_method(IslandPath-DIMOB)	10	1.12	SubName: Full=Possible type III secretion system protein; Flags: Precursor;
|WP_015871564.1|locus|NT01EI_RS09855|prediction_method|Predicted_by_at_least_one_method(Islander)	10	1.15	IucD protein [Escherichia coli CFT073]
|WP_015871560.1|locus|NT01EI_RS09835|prediction_method|Predicted_by_at_least_one_method(Islander)	55	1.17	tetracycline resistance protein [Pseudomonas sp.]
|WP_015871562.1|locus|NT01EI_RS09845|prediction_method|Predicted_by_at_least_one_method(Islander)	6	1.24	RecName: Full=Protein-export protein secB;
|WP_071525679.1|locus|NT01EI_RS01590|prediction_method|Predicted_by_at_least_one_method(Islander,IslandPath-DIMOB)	1	1.29	putative lipoprotein [Enterococcus faecalis V583]
|WP_071525679.1|locus|NT01EI_RS01590|prediction_method|Predicted_by_at_least_one_method(Islander,IslandPath-DIMOB)	1	1.29	putative lipoprotein [Enterococcus faecalis V583]
|WP_015871556.1|locus|NT01EI_RS09815|prediction_method|Predicted_by_at_least_one_method(Islander)	1	1.33	putative endopeptidase [Escherichia coli O157:H7 str. Sakai]
|WP_015870874.1|locus|NT01EI_RS06735|prediction_method|Predicted_by_at_least_one_method(IslandPath-DIMOB)	4	1.33	DraC [Escherichia coli]
|WP_015871557.1|locus|NT01EI_RS09820|prediction_method|Predicted_by_at_least_one_method(Islander)	1	1.37	DNA-cytosine methyltransferase [Pseudomonas putida KT2440]
|WP_035608922.1|locus|NT01EI_RS07780|prediction_method|Predicted_by_at_least_one_method(IslandPath-DIMOB)	1	1.39	putative polyketide synthase [Escherichia coli CFT073]
|WP_015872255.1|locus|NT01EI_RS13160|prediction_method|Predicted_by_at_least_one_method(IslandPath-DIMOB)	3	1.42	putative amidase [Escherichia coli CFT073]
|WP_015872257.1|locus|NT01EI_RS13170|prediction_method|Predicted_by_at_least_one_method(IslandPath-DIMOB)	3	1.47	hypothetical protein c3558 [Escherichia coli CFT073]
|WP_015872652.1|locus|NT01EI_RS15060|prediction_method|Predicted_by_at_least_one_method(IslandPath-DIMOB)	7	1.5	SubName: Full=Sigma-54-dependent transcriptional activator;
|WP_015871594.1|locus|NT01EI_RS18300|prediction_method|Predicted_by_at_least_one_method(IslandPath-DIMOB)	38	1.55	SubName: Full=ORF1;
|WP_015871086.1|locus|NT01EI_RS07760|prediction_method|Predicted_by_at_least_one_method(IslandPath-DIMOB)	30	1.57	trans-sialidase [Trypanosoma cruzi strain CL Brener]
|WP_015872318.1|locus|NT01EI_RS13445|prediction_method|Predicted_by_at_least_one_method(IslandPath-DIMOB)	5	1.6	enhanced entry protein EnhC [Legionella pneumophila subsp. pneumophila str. Philadelphia 1]
|WP_015872648.1|locus|NT01EI_RS15040|prediction_method|Predicted_by_at_least_one_method(IslandPath-DIMOB)	6	1.64	trans-sialidase [Trypanosoma cruzi strain CL Brener]
|WP_015871603.1|locus|NT01EI_RS10070|prediction_method|Predicted_by_at_least_one_method(IslandPath-DIMOB)	4	1.69	SubName: Full=Sigma 54 transcriptional activator;
|WP_015870897.1|locus|NT01EI_RS06830|prediction_method|Predicted_by_at_least_one_method(IslandPath-DIMOB)|annotations|PAG	1	1.7	SubName: Full=Putative uncharacterized protein;
|WP_015870903.1|locus|NT01EI_RS06855|prediction_method|Predicted_by_at_least_one_method(IslandPath-DIMOB)	3	1.71	putative holin protein of prophage CP-933U [Escherichia coli O157:H7 EDL933]
|WP_035609512.1|locus|NT01EI_RS14460|prediction_method|Predicted_by_at_least_one_method(IslandPath-DIMOB,IslandPick)	4	1.75	phosphomethylpyrimidine kinase [Streptococcus agalactiae NEM316]
|WP_035609512.1|locus|NT01EI_RS14460|prediction_method|Predicted_by_at_least_one_method(IslandPath-DIMOB,IslandPick)	4	1.75	phosphomethylpyrimidine kinase [Streptococcus agalactiae NEM316]
|WP_015872645.1|locus|NT01EI_RS15030|prediction_method|Predicted_by_at_least_one_method(IslandPath-DIMOB)	69	1.85	PP-SUL [Photobacterium damselae subsp. piscicida]
|WP_015872305.1|locus|NT01EI_RS13405|prediction_method|Predicted_by_at_least_one_method(IslandPath-DIMOB)	16	1.87	SubName: Full=Lipoprotein Plp4;
|WP_015870852.1|locus|NT01EI_RS06650|prediction_method|Predicted_by_at_least_one_method(IslandPick)	11	1.87	hypothetical protein SpyM3_0962 [Streptococcus pyogenes MGAS315]
|WP_035608418.1|locus|NT01EI_RS10030|prediction_method|Predicted_by_at_least_one_method(IslandPath-DIMOB)	5	1.94	lacto-N-neotetraose biosynthesis glycosyl tranferase [Neisseria meningitidis MC58]
|WP_015872282.1|locus|NT01EI_RS13305|prediction_method|Predicted_by_at_least_one_method(IslandPath-DIMOB)	10	1.96	methylase ermT [Plasmid p121BS]
|WP_015872386.1|locus|NT01EI_RS13750|prediction_method|Predicted_by_at_least_one_method(IslandPath-DIMOB,IslandPick)	4	2.28	variant surface glycoprotein VSG -related [Trypanosoma brucei TREU927]
|WP_015872386.1|locus|NT01EI_RS13750|prediction_method|Predicted_by_at_least_one_method(IslandPath-DIMOB,IslandPick)	4	2.28	variant surface glycoprotein VSG -related [Trypanosoma brucei TREU927]
|WP_015869812.1|locus|NT01EI_RS01610|prediction_method|Predicted_by_at_least_one_method(Islander)	41	2.35	RecName: Full=Sphingomyelin phosphodiesterase D SdSicTox-betaIIB1bvi; Short=SMD; Short=SMase D; Short=Sphingomyelinase D; EC=3.1.4.41; Flags: Fragment;
|WP_015872646.1|locus|NT01EI_RS15035|prediction_method|Predicted_by_at_least_one_method(IslandPath-DIMOB)	5	2.46	salicylate biosynthesis protein, chorismate mutase
|WP_015872303.1|locus|NT01EI_RS13395|prediction_method|Predicted_by_at_least_one_method(IslandPath-DIMOB)	4	2.51	ISSfl3 orfA [Shigella flexneri 2a str. 2457T]
|WP_050977432.1|locus|NT01EI_RS06590|prediction_method|Predicted_by_at_least_one_method(IslandPath-DIMOB,SIGI-HMM)	4	2.55	MIC3 microneme protein [Toxoplasma gondii]
|WP_050977432.1|locus|NT01EI_RS06590|prediction_method|Predicted_by_at_least_one_method(IslandPath-DIMOB,SIGI-HMM)	4	2.55	MIC3 microneme protein [Toxoplasma gondii]
|WP_071525670.1|locus|NT01EI_RS06710|prediction_method|Predicted_by_at_least_one_method(IslandPath-DIMOB)	6	2.61	hypothetical protein SAG0246 [Streptococcus agalactiae 2603V/R]
|WP_035610325.1|locus|NT01EI_RS18685|prediction_method|Predicted_by_at_least_one_method(IslandPath-DIMOB,IslandPick)	7	2.65	SubName: Full=SecDF protein, putative;
|WP_035610325.1|locus|NT01EI_RS18685|prediction_method|Predicted_by_at_least_one_method(IslandPath-DIMOB,IslandPick)	7	2.65	SubName: Full=SecDF protein, putative;
|WP_015872382.1|locus|NT01EI_RS13730|prediction_method|Predicted_by_at_least_one_method(IslandPath-DIMOB,IslandPick)	3	2.89	hypothetical protein VC1772 [Vibrio cholerae O1 biovar El Tor str. N16961]
|WP_015872382.1|locus|NT01EI_RS13730|prediction_method|Predicted_by_at_least_one_method(IslandPath-DIMOB,IslandPick)	3	2.89	hypothetical protein VC1772 [Vibrio cholerae O1 biovar El Tor str. N16961]
|WP_071525746.1|locus|NT01EI_RS13415|prediction_method|Predicted_by_at_least_one_method(IslandPath-DIMOB)	2	2.94	hypothetical protein S2121 [Shigella flexneri 2a str. 2457T]
|WP_035610176.1|locus|NT01EI_RS13320|prediction_method|Predicted_by_at_least_one_method(IslandPath-DIMOB)	1	2.94	cathepsin C1 [Toxoplasma gondii]
|WP_015870875.1|locus|NT01EI_RS06740|prediction_method|Predicted_by_at_least_one_method(IslandPath-DIMOB)	4	2.97	RecName: Full=Thrombin-like enzyme shedaoenase; EC=3.4.21.-;
|WP_015870830.1|locus|NT01EI_RS06560|prediction_method|Predicted_by_at_least_one_method(IslandPath-DIMOB)	2	3.02	RecName: Full=Nif-specific regulatory protein;
|WP_015869783.1|locus|NT01EI_RS01470|prediction_method|Predicted_by_at_least_one_method(Islander,IslandPath-DIMOB)	5	3.03	SubName: Full=SpaN;
|WP_015869783.1|locus|NT01EI_RS01470|prediction_method|Predicted_by_at_least_one_method(Islander,IslandPath-DIMOB)	5	3.03	SubName: Full=SpaN;
|WP_041730600.1|locus|NT01EI_RS16230|prediction_method|Predicted_by_at_least_one_method(SIGI-HMM)	5	3.07	ferrous iron transport protein B [Salmonella typhimurium LT2]
|WP_050977436.1|locus|NT01EI_RS06555|prediction_method|Predicted_by_at_least_one_method(IslandPath-DIMOB)	1	3.11	SubName: Full=3FTx-Dis2;
|WP_015871522.1|locus|NT01EI_RS09660|prediction_method|Predicted_by_at_least_one_method(IslandPath-DIMOB)	1	3.2	putative recombinase [Listeria innocua Clip11262]
|WP_071525690.1|locus|NT01EI_RS17580|prediction_method|Predicted_by_at_least_one_method(Islander,IslandPath-DIMOB)	11	3.35	RecName: Full=PII-type proteinase; EC=3.4.21.96; AltName: Full=Cell wall-associated serine proteinase; AltName: Full=LP151; AltName: Full=Lactocepin; Flags: Precursor;
|WP_071525690.1|locus|NT01EI_RS17580|prediction_method|Predicted_by_at_least_one_method(Islander,IslandPath-DIMOB)	11	3.35	RecName: Full=PII-type proteinase; EC=3.4.21.96; AltName: Full=Cell wall-associated serine proteinase; AltName: Full=LP151; AltName: Full=Lactocepin; Flags: Precursor;
|WP_071525731.1|locus|NT01EI_RS18455|prediction_method|Predicted_by_at_least_one_method(IslandPath-DIMOB,SIGI-HMM)	3	3.39	RecName: Full=Probable outer membrane protein pmpE; AltName: Full=Polymorphic membrane protein E; Flags: Precursor;
|WP_071525731.1|locus|NT01EI_RS18455|prediction_method|Predicted_by_at_least_one_method(IslandPath-DIMOB,SIGI-HMM)	3	3.39	RecName: Full=Probable outer membrane protein pmpE; AltName: Full=Polymorphic membrane protein E; Flags: Precursor;
|WP_051142560.1|locus|NT01EI_RS17410|prediction_method|Predicted_by_at_least_one_method(IslandPath-DIMOB,SIGI-HMM,Islander)	11	3.39	flagellar export protein, ATPase
|WP_051142560.1|locus|NT01EI_RS17410|prediction_method|Predicted_by_at_least_one_method(IslandPath-DIMOB,SIGI-HMM,Islander)	11	3.39	flagellar export protein, ATPase
|WP_051142560.1|locus|NT01EI_RS17410|prediction_method|Predicted_by_at_least_one_method(IslandPath-DIMOB,SIGI-HMM,Islander)	11	3.39	flagellar export protein, ATPase
|WP_035609012.1|locus|NT01EI_RS17905|prediction_method|Predicted_by_at_least_one_method(IslandPath-DIMOB)	2	3.44	RecName: Full=RNA-directed RNA polymerase L; Short=Protein L; AltName: Full=Large structural protein; AltName: Full=Replicase; AltName: Full=Transcriptase; Includes: RecName: Full=Ubiquitin thiolesterase; EC=3.4.19.12; RecName: Full=RNA-directed RNA polym
|WP_035610228.1|locus|NT01EI_RS10060|prediction_method|Predicted_by_at_least_one_method(IslandPath-DIMOB)	36	3.46	Beta-Lactamase E.C.3.5.2.6 Complexed With [[n- Benzyloxycarbonyl amino]methyl]phosphonate
|WP_015872264.1|locus|NT01EI_RS13210|prediction_method|Predicted_by_at_least_one_method(IslandPath-DIMOB)	3	3.47	RecName: Full=Zinc metalloproteinase lebetase-4; Short=Le-4; Short=Le4; EC=3.4.24.-; Flags: Precursor; Fragment;
|WP_015870892.1|locus|NT01EI_RS06810|prediction_method|Predicted_by_at_least_one_method(IslandPath-DIMOB,SIGI-HMM)	41	3.47	dihydrofolate reductase [Acinetobacter baumannii]
|WP_015870892.1|locus|NT01EI_RS06810|prediction_method|Predicted_by_at_least_one_method(IslandPath-DIMOB,SIGI-HMM)	41	3.47	dihydrofolate reductase [Acinetobacter baumannii]
|WP_071525664.1|locus|NT01EI_RS10040|prediction_method|Predicted_by_at_least_one_method(IslandPath-DIMOB)	8	3.54	RecName: Full=U8-ctenitoxin-Pr1a; Short=U8-CNTX-Pr1a; AltName: Full=Probable neurotoxin PRTx34C2;
|WP_035609587.1|locus|NT01EI_RS06540|prediction_method|Predicted_by_at_least_one_method(IslandPath-DIMOB)	3	3.56	SubName: Full=MC013L; SubName: Full=Putative molecular chaperone;
|WP_041730357.1|locus|NT01EI_RS06785|prediction_method|Predicted_by_at_least_one_method(IslandPath-DIMOB)	4	3.78	trans-sialidase [Trypanosoma cruzi strain CL Brener]
|WP_015869769.1|locus|NT01EI_RS01400|prediction_method|Predicted_by_at_least_one_method(Islander,IslandPath-DIMOB)	2	3.84	SubName: Full=Protein-export membrane protein SecDF;
|WP_015869769.1|locus|NT01EI_RS01400|prediction_method|Predicted_by_at_least_one_method(Islander,IslandPath-DIMOB)	2	3.84	SubName: Full=Protein-export membrane protein SecDF;
|WP_071525684.1|locus|NT01EI_RS18710|prediction_method|Predicted_by_at_least_one_method(IslandPath-DIMOB)	3	3.86	30S ribosomal protein S1 [Salmonella enterica subsp. enterica serovar Typhimurium str. LT2]
|WP_071525709.1|locus|NT01EI_RS18735|prediction_method|Predicted_by_at_least_one_method(IslandPath-DIMOB,SIGI-HMM)	2	3.89	flagellum-specific ATP synthase [Campylobacter jejuni subsp. jejuni NCTC 11168]
|WP_071525709.1|locus|NT01EI_RS18735|prediction_method|Predicted_by_at_least_one_method(IslandPath-DIMOB,SIGI-HMM)	2	3.89	flagellum-specific ATP synthase [Campylobacter jejuni subsp. jejuni NCTC 11168]
|WP_015871966.1|locus|NT01EI_RS11700|prediction_method|Predicted_by_at_least_one_method(IslandPath-DIMOB)	2	4.01	succinoglycan biosynthesis protein EXOI [Mesorhizobium loti MAFF303099]
|WP_071525695.1|locus|NT01EI_RS17900|prediction_method|Predicted_by_at_least_one_method(IslandPath-DIMOB)	1	4.32	micronemal protein MIC2 [Toxoplasma gondii]
|WP_015870873.1|locus|NT01EI_RS06730|prediction_method|Predicted_by_at_least_one_method(IslandPath-DIMOB)	3	4.43	type I restriction-modification enzyme S subunit [Nostoc sp. PCC 7120]
|WP_015871090.1|locus|NT01EI_RS07775|prediction_method|Predicted_by_at_least_one_method(IslandPath-DIMOB)	1	4.59	RecName: Full=Carbamate kinase; EC=2.7.2.2;
|WP_015870677.1|locus|NT01EI_RS05855|prediction_method|Predicted_by_at_least_one_method(IslandPath-DIMOB)	5	4.64	SubName: Full=Putative uncharacterized protein;
|WP_015870838.1|locus|NT01EI_RS06595|prediction_method|Predicted_by_at_least_one_method(IslandPath-DIMOB,SIGI-HMM)	7	5.19	RecName: Full=Alanine racemase; EC=5.1.1.1;
|WP_015870838.1|locus|NT01EI_RS06595|prediction_method|Predicted_by_at_least_one_method(IslandPath-DIMOB,SIGI-HMM)	7	5.19	RecName: Full=Alanine racemase; EC=5.1.1.1;
|WP_071525716.1|locus|NT01EI_RS17850|prediction_method|Predicted_by_at_least_one_method(IslandPath-DIMOB,SIGI-HMM)	7	5.49	hypothetical protein ECs1373 [Escherichia coli O157:H7 str. Sakai]
|WP_071525716.1|locus|NT01EI_RS17850|prediction_method|Predicted_by_at_least_one_method(IslandPath-DIMOB,SIGI-HMM)	7	5.49	hypothetical protein ECs1373 [Escherichia coli O157:H7 str. Sakai]
|WP_015870663.1|locus|NT01EI_RS05800|prediction_method|Predicted_by_at_least_one_method(IslandPath-DIMOB)	3	5.78	SubName: Full=Type III secretion outer membrane pore, YscC/HrcC family;
|WP_015872392.1|locus|NT01EI_RS13775|prediction_method|Predicted_by_at_least_one_method(IslandPath-DIMOB)	3	5.96	aminoglycoside 3-N-acetyltransferase [Streptomyces griseus]
|WP_071525718.1|locus|NT01EI_RS18680|prediction_method|Predicted_by_at_least_one_method(IslandPath-DIMOB)	1	6.02	SubName: Full=Neurotoxin consisting of botulinum neurotoxin D and C1;
|WP_015871569.1|locus|NT01EI_RS09885|prediction_method|Predicted_by_at_least_one_method(Islander)	1	6.08	hypothetical protein SCO6918 [Streptomyces coelicolor A3 2 ]
|WP_015872525.1|locus|NT01EI_RS18670|prediction_method|Predicted_by_at_least_one_method(IslandPath-DIMOB)	4	6.65	hypothetical protein XAC3293 [Xanthomonas axonopodis pv. citri str. 306]
|WP_015870662.1|locus|NT01EI_RS05795|prediction_method|Predicted_by_at_least_one_method(IslandPath-DIMOB)	2	6.87	erythrocyte membrane protein 1 PfEMP1 [Plasmodium falciparum 3D7]
|WP_015870840.1|locus|NT01EI_RS06600|prediction_method|Predicted_by_at_least_one_method(IslandPath-DIMOB)	1	7.02	hypothetical protein BT_2988 [Bacteroides thetaiotaomicron VPI-5482]
|WP_015872528.1|locus|NT01EI_RS18690|prediction_method|Predicted_by_at_least_one_method(IslandPath-DIMOB,IslandPick)	1	7.16	Cyst wall protein 2 [Giardia lamblia ATCC 50803]
|WP_015872528.1|locus|NT01EI_RS18690|prediction_method|Predicted_by_at_least_one_method(IslandPath-DIMOB,IslandPick)	1	7.16	Cyst wall protein 2 [Giardia lamblia ATCC 50803]
|WP_015871565.1|locus|NT01EI_RS09860|prediction_method|Predicted_by_at_least_one_method(Islander)	7	7.23	SubName: Full=Homolog of vaccinia virus CDS B5R;
|WP_015872399.1|locus|NT01EI_RS13810|prediction_method|Predicted_by_at_least_one_method(IslandPath-DIMOB)	8	7.42	RecName: Full=Complement control protein homolog; Short=CCPH; Flags: Precursor;
|WP_015872231.1|locus|NT01EI_RS13040|prediction_method|Predicted_by_at_least_one_method(IslandPath-DIMOB)	10	7.55	hypothetical protein SARI_03057 [Salmonella enterica subsp. arizonae serovar 62:z4,z23:--]
|WP_015871974.1|locus|NT01EI_RS11730|prediction_method|Predicted_by_at_least_one_method(SIGI-HMM)	2	7.73	SubName: Full=dTDP-glucose 4,6-dehydratase; EC=4.2.1.46;
|WP_015870668.1|locus|NT01EI_RS05815|prediction_method|Predicted_by_at_least_one_method(IslandPath-DIMOB,SIGI-HMM)	1	7.75	pore forming, adhesion, alters cell signalling, causes apoptosis
|WP_015870668.1|locus|NT01EI_RS05815|prediction_method|Predicted_by_at_least_one_method(IslandPath-DIMOB,SIGI-HMM)	1	7.75	pore forming, adhesion, alters cell signalling, causes apoptosis
|WP_051142559.1|locus|NT01EI_RS09705|prediction_method|Predicted_by_at_least_one_method(IslandPath-DIMOB)	1	8.03	trans-sialidase [Trypanosoma cruzi strain CL Brener]
|WP_015872549.1|locus|NT01EI_RS14585|prediction_method|Predicted_by_at_least_one_method(IslandPath-DIMOB,SIGI-HMM)	1	8.25	erythrocyte membrane protein 1 PfEMP1 [Plasmodium falciparum 3D7]
|WP_015872549.1|locus|NT01EI_RS14585|prediction_method|Predicted_by_at_least_one_method(IslandPath-DIMOB,SIGI-HMM)	1	8.25	erythrocyte membrane protein 1 PfEMP1 [Plasmodium falciparum 3D7]
|WP_015870901.1|locus|NT01EI_RS06850|prediction_method|Predicted_by_at_least_one_method(IslandPath-DIMOB)	1	8.26	trans-sialidase [Trypanosoma cruzi strain CL Brener]
|WP_035610102.1|locus|NT01EI_RS14495|prediction_method|Predicted_by_at_least_one_method(IslandPath-DIMOB,IslandPick)	1	8.32	RecName: Full=Multiphosphoryl transfer protein; Short=MTP; Includes: RecName: Full=Phosphoenolpyruvate-protein phosphotransferase; EC=2.7.3.9; AltName: Full=Phosphotransferase system enzyme I; RecName: Full=Phosphocarrier protein HPr; Short=Protein H; Rec
|WP_035610102.1|locus|NT01EI_RS14495|prediction_method|Predicted_by_at_least_one_method(IslandPath-DIMOB,IslandPick)	1	8.32	RecName: Full=Multiphosphoryl transfer protein; Short=MTP; Includes: RecName: Full=Phosphoenolpyruvate-protein phosphotransferase; EC=2.7.3.9; AltName: Full=Phosphotransferase system enzyme I; RecName: Full=Phosphocarrier protein HPr; Short=Protein H; Rec
|WP_015871524.1|locus|NT01EI_RS09670|prediction_method|Predicted_by_at_least_one_method(IslandPath-DIMOB)	2	8.45	type III secretion system apparatus protein [Salmonella typhimurium LT2]
|WP_015872395.1|locus|NT01EI_RS13790|prediction_method|Predicted_by_at_least_one_method(IslandPath-DIMOB)	1	8.78	iron III dicitrate transport ATP-binding protein fecE like
|WP_015872524.1|locus|NT01EI_RS14465|prediction_method|Predicted_by_at_least_one_method(IslandPath-DIMOB,IslandPick)|annotations|PAG	1	8.86	GLP_541_5204_3867 [Giardia lamblia ATCC 50803]
|WP_015872524.1|locus|NT01EI_RS14465|prediction_method|Predicted_by_at_least_one_method(IslandPath-DIMOB,IslandPick)|annotations|PAG	1	8.86	GLP_541_5204_3867 [Giardia lamblia ATCC 50803]
|WP_015871598.1|locus|NT01EI_RS10045|prediction_method|Predicted_by_at_least_one_method(IslandPath-DIMOB)	2	9.14	hypothetical protein Cj1435c [Campylobacter jejuni subsp. jejuni NCTC 11168]
|WP_015869809.1|locus|NT01EI_RS01600|prediction_method|Predicted_by_at_least_one_method(Islander,IslandPath-DIMOB)	3	9.17	4-hydroxyphenylacetate catabolism [Salmonella enterica subsp. enterica serovar Typhimurium str. LT2]
|WP_015869809.1|locus|NT01EI_RS01600|prediction_method|Predicted_by_at_least_one_method(Islander,IslandPath-DIMOB)	3	9.17	4-hydroxyphenylacetate catabolism [Salmonella enterica subsp. enterica serovar Typhimurium str. LT2]
|WP_015872256.1|locus|NT01EI_RS13165|prediction_method|Predicted_by_at_least_one_method(IslandPath-DIMOB)	0		not available
|WP_015872262.1|locus|NT01EI_RS13195|prediction_method|Predicted_by_at_least_one_method(IslandPath-DIMOB)	0		not available
|WP_034164264.1|locus|NT01EI_RS13200|prediction_method|Predicted_by_at_least_one_method(IslandPath-DIMOB)	0		not available
|WP_050977467.1|locus|NT01EI_RS13355|prediction_method|Predicted_by_at_least_one_method(IslandPath-DIMOB)	0		not available
|WP_015872308.1|locus|NT01EI_RS13420|prediction_method|Predicted_by_at_least_one_method(IslandPath-DIMOB)	0		not available
|WP_035610117.1|locus|NT01EI_RS18640|prediction_method|Predicted_by_at_least_one_method(IslandPath-DIMOB,IslandPick)	0		not available
|WP_015872393.1|locus|NT01EI_RS13780|prediction_method|Predicted_by_at_least_one_method(IslandPath-DIMOB)	0		not available
|WP_015872394.1|locus|NT01EI_RS13785|prediction_method|Predicted_by_at_least_one_method(IslandPath-DIMOB)	0		not available
|WP_015872397.1|locus|NT01EI_RS13800|prediction_method|Predicted_by_at_least_one_method(IslandPath-DIMOB)	0		not available
|WP_035610117.1|locus|NT01EI_RS18640|prediction_method|Predicted_by_at_least_one_method(IslandPath-DIMOB,IslandPick)	0		not available
|WP_035610308.1|locus|NT01EI_RS14530|prediction_method|Predicted_by_at_least_one_method(IslandPath-DIMOB)	0		not available
|WP_071525761.1|locus|NT01EI_RS18725|prediction_method|Predicted_by_at_least_one_method(IslandPath-DIMOB)	0		not available
|WP_035610314.1|locus|NT01EI_RS14535|prediction_method|Predicted_by_at_least_one_method(IslandPath-DIMOB)|annotations|PAG	0		not available
|WP_041730556.1|locus|NT01EI_RS14545|prediction_method|Predicted_by_at_least_one_method(IslandPath-DIMOB)	0		not available
|WP_041730224.1|locus|NT01EI_RS01415|prediction_method|Predicted_by_at_least_one_method(Islander,IslandPath-DIMOB)	0		not available
|WP_015869777.1|locus|NT01EI_RS17585|prediction_method|Predicted_by_at_least_one_method(Islander,IslandPath-DIMOB)	0		not available
|WP_035608639.1|locus|NT01EI_RS01630|prediction_method|Predicted_by_at_least_one_method(Islander)	0		not available
|WP_041730224.1|locus|NT01EI_RS01415|prediction_method|Predicted_by_at_least_one_method(Islander,IslandPath-DIMOB)	0		not available
|WP_015869777.1|locus|NT01EI_RS17585|prediction_method|Predicted_by_at_least_one_method(Islander,IslandPath-DIMOB)	0		not available
|WP_015870683.1|locus|NT01EI_RS05885|prediction_method|Predicted_by_at_least_one_method(IslandPath-DIMOB)	0		not available
|WP_015870851.1|locus|NT01EI_RS06645|prediction_method|Predicted_by_at_least_one_method(IslandPick)	0		not available
|WP_050977384.1|locus|NT01EI_RS17350|prediction_method|Predicted_by_at_least_one_method(IslandPath-DIMOB)	0		not available
|WP_071820493.1|locus|NT01EI_RS17910|prediction_method|Predicted_by_at_least_one_method(IslandPath-DIMOB)	0		not available
|WP_071525713.1|locus|NT01EI_RS06815|prediction_method|Predicted_by_at_least_one_method(IslandPath-DIMOB)	0		not available
|WP_041730364.1|locus|NT01EI_RS06835|prediction_method|Predicted_by_at_least_one_method(IslandPath-DIMOB)	0		not available
|WP_015871523.1|locus|NT01EI_RS09665|prediction_method|Predicted_by_at_least_one_method(IslandPath-DIMOB)	0		not available

## Sheet: E. piscicida C07-087
Genomic islands
IDENTIFIED GENOMIC ISLANDS GENES	IDENTIFIED GENOMICS ISLANDS GENES SEARCHED AGAINST MVIRDB(VIRULENCE DATABASE)
	Number of hits	Lowest E-value	Description (E-value)
|WP_051065050.1|locus|ETAC_RS09575|prediction_method|Predicted_by_at_least_one_method(IslandPath-DIMOB,IslandPick)	36	0	Clp protease-like protein [Phage Gifsy-2]
|WP_015461721.1|locus|ETAC_RS09590|prediction_method|Predicted_by_at_least_one_method(IslandPath-DIMOB,IslandPick)	22	0	putative DNA packaging protein of prophage [Escherichia coli CFT073]
|WP_051065050.1|locus|ETAC_RS09575|prediction_method|Predicted_by_at_least_one_method(IslandPath-DIMOB,IslandPick)	36	0	Clp protease-like protein [Phage Gifsy-2]
|WP_015461721.1|locus|ETAC_RS09590|prediction_method|Predicted_by_at_least_one_method(IslandPath-DIMOB,IslandPick)	22	0	putative DNA packaging protein of prophage [Escherichia coli CFT073]
|WP_071840977.1|locus|ETAC_RS17745|prediction_method|Predicted_by_at_least_one_method(SIGI-HMM)	52	0	PrfC protein [Escherichia coli]
|WP_015461975.1|locus|ETAC_RS11635|prediction_method|Predicted_by_at_least_one_method(SIGI-HMM,IslandPath-DIMOB)	26	0	putative tail component of prophage [Escherichia coli CFT073]
|WP_015461975.1|locus|ETAC_RS11635|prediction_method|Predicted_by_at_least_one_method(SIGI-HMM,IslandPath-DIMOB)	26	0	putative tail component of prophage [Escherichia coli CFT073]
|WP_015462024.1|locus|ETAC_RS11875|prediction_method|Predicted_by_at_least_one_method(SIGI-HMM)	100	0	putative integrase [Escherichia coli O157:H7 str. Sakai]
|WP_015462157.1|locus|ETAC_RS13000|prediction_method|Predicted_by_at_least_one_method(SIGI-HMM)	100	0	putative integrase [Shigella flexneri 2a str. 301]
|WP_015462362.1|locus|ETAC_RS14770|prediction_method|Predicted_by_at_least_one_method(IslandPath-DIMOB)	71	0	bacteriophage P4 integrase [Escherichia coli]
|WP_015462523.1|locus|ETAC_RS16475|prediction_method|Predicted_by_at_least_one_method(IslandPath-DIMOB)	22	0	phage tail sheath-like protein [Salmonella enterica subsp. enterica serovar Typhimurium str. LT2]
|WP_015462541.1|locus|ETAC_RS16565|prediction_method|Predicted_by_at_least_one_method(IslandPath-DIMOB)	10	0	terminase-like protein [Enterobacteria phage Fels-2]
|WP_015461719.1|locus|ETAC_RS09580|prediction_method|Predicted_by_at_least_one_method(IslandPath-DIMOB,IslandPick)	6	7.16e-171	putative head-tail preconnector protein of prophage CP-933U [Escherichia coli O157:H7 EDL933]
|WP_015461719.1|locus|ETAC_RS09580|prediction_method|Predicted_by_at_least_one_method(IslandPath-DIMOB,IslandPick)	6	7.16e-171	putative head-tail preconnector protein of prophage CP-933U [Escherichia coli O157:H7 EDL933]
|WP_041692893.1|locus|ETAC_RS12995|prediction_method|Predicted_by_at_least_one_method(SIGI-HMM)	100	2.32e-158	putative phage integrase [Shigella flexneri 2a str. 2457T]
|WP_015462543.1|locus|ETAC_RS16575|prediction_method|Predicted_by_at_least_one_method(IslandPath-DIMOB)	6	6.51e-158	portal vertex-like protein [Enterobacteria phage Fels-2]
|WP_041692832.1|locus|ETAC_RS02125|prediction_method|Predicted_by_at_least_one_method(IslandPath-DIMOB)	14	2.63e-152	terminase subunit [Salmonella enterica subsp. enterica serovar Typhi str. CT18]
|WP_015462539.1|locus|ETAC_RS16555|prediction_method|Predicted_by_at_least_one_method(IslandPath-DIMOB)	13	6.45e-150	putative major capsid protein [Salmonella enterica subsp. enterica serovar Typhi str. Ty2]
|WP_015461234.1|locus|ETAC_RS17450|prediction_method|Predicted_by_at_least_one_method(SIGI-HMM)	12	4.62e-140	N-acetyl neuramic acid synthetase NeuB [Streptococcus agalactiae 2603V/R]
|WP_015462527.1|locus|ETAC_RS16495|prediction_method|Predicted_by_at_least_one_method(IslandPath-DIMOB)	13	2.49e-139	phage baseplate assembly protein [Salmonella enterica subsp. enterica serovar Typhi str. Ty2]
|WP_015461852.1|locus|ETAC_RS10630|prediction_method|Predicted_by_at_least_one_method(SIGI-HMM)	51	4.1e-134	PapD protein [Escherichia coli CFT073]
|WP_015462518.1|locus|ETAC_RS16450|prediction_method|Predicted_by_at_least_one_method(IslandPath-DIMOB)	11	4.74e-127	putative regulator of late gene expression [Salmonella enterica subsp. enterica serovar Typhi str. Ty2]
|WP_015460842.1|locus|ETAC_RS02070|prediction_method|Predicted_by_at_least_one_method(IslandPath-DIMOB)	100	1.09e-125	phage tail-like protein [Enterobacteria phage Fels-2]
|WP_015461977.1|locus|ETAC_RS17780|prediction_method|Predicted_by_at_least_one_method(SIGI-HMM,IslandPath-DIMOB)	15	1.34e-117	putative tail fiber component K of prophage CP-933U [Escherichia coli O157:H7 EDL933]
|WP_015461977.1|locus|ETAC_RS17780|prediction_method|Predicted_by_at_least_one_method(SIGI-HMM,IslandPath-DIMOB)	15	1.34e-117	putative tail fiber component K of prophage CP-933U [Escherichia coli O157:H7 EDL933]
|WP_071840984.1|locus|ETAC_RS11895|prediction_method|Predicted_by_at_least_one_method(IslandPath-DIMOB)	95	5.78e-112	transposase [Escherichia coli CFT073]
|WP_015461730.1|locus|ETAC_RS09640|prediction_method|Predicted_by_at_least_one_method(IslandPath-DIMOB)	6	9.31e-109	hypothetical protein c3192 [Escherichia coli CFT073]
|WP_015460848.1|locus|ETAC_RS02100|prediction_method|Predicted_by_at_least_one_method(IslandPath-DIMOB)	9	4.35e-106	DNA adenine methylase-like protein [Salmonella enterica subsp. enterica serovar Typhimurium str. LT2]
|WP_012848070.1|locus|ETAC_RS17455|prediction_method|Predicted_by_at_least_one_method(SIGI-HMM)	13	7.09e-106	UDP-N-acetylglucosamine-2-epimerase NeuC [Streptococcus agalactiae 2603V/R]
|WP_071840985.1|locus|ETAC_RS17830|prediction_method|Predicted_by_at_least_one_method(IslandPath-DIMOB)	6	6.17e-105	hypothetical protein c2397 [Escherichia coli CFT073]
|WP_015462005.1|locus|ETAC_RS11785|prediction_method|Predicted_by_at_least_one_method(IslandPick)	15	1.64e-104	hypothetical protein c3188 [Escherichia coli CFT073]
|WP_015461978.1|locus|ETAC_RS11650|prediction_method|Predicted_by_at_least_one_method(SIGI-HMM,IslandPath-DIMOB)	39	2.12e-102	putative tail component of prophage [Escherichia coli CFT073]
|WP_015461978.1|locus|ETAC_RS11650|prediction_method|Predicted_by_at_least_one_method(SIGI-HMM,IslandPath-DIMOB)	39	2.12e-102	putative tail component of prophage [Escherichia coli CFT073]
|WP_071840997.1|locus|ETAC_RS02110|prediction_method|Predicted_by_at_least_one_method(IslandPath-DIMOB)	10	1.35e-85	hypothetical protein t4328 [Salmonella enterica subsp. enterica serovar Typhi str. Ty2]
|WP_015461854.1|locus|ETAC_RS17750|prediction_method|Predicted_by_at_least_one_method(SIGI-HMM)	50	9.54e-83	PrfH protein [Escherichia coli]
|WP_015462526.1|locus|ETAC_RS16490|prediction_method|Predicted_by_at_least_one_method(IslandPath-DIMOB)	29	1.43e-82	phage tail-like protein [Salmonella enterica subsp. enterica serovar Typhimurium str. LT2]
|WP_015462540.1|locus|ETAC_RS16560|prediction_method|Predicted_by_at_least_one_method(IslandPath-DIMOB)	7	7.32e-74	bacteriophage protein [Ralstonia solanacearum GMI1000]
|WP_015461976.1|locus|ETAC_RS11640|prediction_method|Predicted_by_at_least_one_method(SIGI-HMM,IslandPath-DIMOB)	9	9.9e-73	tail assembly protein [Phage Gifsy-2]
|WP_015461976.1|locus|ETAC_RS11640|prediction_method|Predicted_by_at_least_one_method(SIGI-HMM,IslandPath-DIMOB)	9	9.9e-73	tail assembly protein [Phage Gifsy-2]
|WP_041692819.1|locus|ETAC_RS16530|prediction_method|Predicted_by_at_least_one_method(IslandPath-DIMOB)	11	3.62e-71	Fels-2 prophage: probable prophage lysozyme [Salmonella typhimurium LT2]
|WP_015462520.1|locus|ETAC_RS16460|prediction_method|Predicted_by_at_least_one_method(IslandPath-DIMOB)	17	7.35e-68	putative tail protein [Escherichia coli O157:H7]
|WP_041692822.1|locus|ETAC_RS16595|prediction_method|Predicted_by_at_least_one_method(IslandPath-DIMOB,SIGI-HMM)	11	1.33e-67	putative phage replication protein [Escherichia coli O157:H7 str. Sakai]
|WP_041692822.1|locus|ETAC_RS16595|prediction_method|Predicted_by_at_least_one_method(IslandPath-DIMOB,SIGI-HMM)	11	1.33e-67	putative phage replication protein [Escherichia coli O157:H7 str. Sakai]
|WP_015462340.1|locus|ETAC_RS14650|prediction_method|Predicted_by_at_least_one_method(IslandPath-DIMOB)	75	5.6e-65	usher protein [Salmonella typhimurium LT2]
|WP_015460853.1|locus|ETAC_RS02120|prediction_method|Predicted_by_at_least_one_method(IslandPath-DIMOB)	7	1.11e-64	portal vertex-like protein [Enterobacteria phage Fels-2]
|WP_071840968.1|locus|ETAC_RS17605|prediction_method|Predicted_by_at_least_one_method(SIGI-HMM)	4	9.79e-62	DLP12 prophage; secreted protein, UPF0098 family [Escherichia coli str. K-12 substr. MG1655]
|WP_001207674.1|locus|ETAC_RS16470|prediction_method|Predicted_by_at_least_one_method(IslandPath-DIMOB)	10	8.74e-61	major tail tube protein [Salmonella enterica subsp. enterica serovar Typhi str. Ty2]
|WP_003845566.1|locus|ETAC_RS03985|prediction_method|Predicted_by_at_least_one_method(IslandPath-DIMOB)	47	2.42e-60	transposase [Escherichia coli CFT073]
|WP_015461990.1|locus|ETAC_RS11710|prediction_method|Predicted_by_at_least_one_method(SIGI-HMM)	22	4.61e-60	head portal protein [Mesorhizobium loti MAFF303099]
|WP_015462553.1|locus|ETAC_RS16630|prediction_method|Predicted_by_at_least_one_method(IslandPick)	100	1.15e-58	phage tail-like protein [Enterobacteria phage Fels-2]
|WP_015461235.1|locus|ETAC_RS05775|prediction_method|Predicted_by_at_least_one_method(SIGI-HMM)	22	9.44e-54	CMP-N-acetylneuraminic acid synthetase NeuA [Streptococcus agalactiae 2603V/R]
|WP_015461724.1|locus|ETAC_RS09610|prediction_method|Predicted_by_at_least_one_method(IslandPath-DIMOB)	12	9.79e-54	putative secretion activating protein [Vibrio vulnificus CMCP6]
|WP_015462519.1|locus|ETAC_RS16455|prediction_method|Predicted_by_at_least_one_method(IslandPath-DIMOB)	19	5.37e-53	putative phage tail protein [Salmonella enterica subsp. enterica serovar Typhi str. Ty2]
|WP_015461851.1|locus|ETAC_RS10625|prediction_method|Predicted_by_at_least_one_method(SIGI-HMM)	62	6.34e-52	PrfK protein [Escherichia coli]
|WP_015460845.1|locus|ETAC_RS02085|prediction_method|Predicted_by_at_least_one_method(IslandPath-DIMOB)	4	1.03e-51	hypothetical protein STM2736 [Salmonella enterica subsp. enterica serovar Typhimurium str. LT2]
|WP_041692765.1|locus|ETAC_RS17680|prediction_method|Predicted_by_at_least_one_method(IslandPath-DIMOB)	48	3.95e-51	putative repressor protein of prophage [Escherichia coli CFT073]
|WP_015461989.1|locus|ETAC_RS11705|prediction_method|Predicted_by_at_least_one_method(SIGI-HMM)	10	6.86e-51	ClpP protease [Mesorhizobium loti MAFF303099]
|WP_015462032.1|locus|ETAC_RS11915|prediction_method|Predicted_by_at_least_one_method(IslandPath-DIMOB)	46	9.12e-50	putative transposase [Escherichia coli O157:H7 str. Sakai]
|WP_015462529.1|locus|ETAC_RS16505|prediction_method|Predicted_by_at_least_one_method(IslandPath-DIMOB)	7	9.04e-46	putative phage baseplate assembly protein [Salmonella enterica subsp. enterica serovar Typhi str. Ty2]
|WP_041692786.1|locus|ETAC_RS11790|prediction_method|Predicted_by_at_least_one_method(IslandPick)	13	4.57e-45	hypothetical protein c3189 [Escherichia coli CFT073]
|WP_015462542.1|locus|ETAC_RS16570|prediction_method|Predicted_by_at_least_one_method(IslandPath-DIMOB)	6	1.17e-44	terminase subunit [Salmonella enterica subsp. enterica serovar Typhi str. CT18]
|WP_015462538.1|locus|ETAC_RS16550|prediction_method|Predicted_by_at_least_one_method(IslandPath-DIMOB)	5	6.74e-44	bacteriophage protein [Ralstonia solanacearum GMI1000]
|WP_015462339.1|locus|ETAC_RS14645|prediction_method|Predicted_by_at_least_one_method(IslandPath-DIMOB)	48	4.11e-43	chaperone [Salmonella typhimurium LT2]
|WP_015462537.1|locus|ETAC_RS16545|prediction_method|Predicted_by_at_least_one_method(IslandPath-DIMOB)	6	1.39e-41	head completion-like protein [Salmonella enterica subsp. enterica serovar Typhimurium str. LT2]
|WP_015462528.1|locus|ETAC_RS16500|prediction_method|Predicted_by_at_least_one_method(IslandPath-DIMOB)	88	1.53e-41	phage baseplate assembly protein [Salmonella enterica subsp. enterica serovar Typhi str. Ty2]
|WP_041692818.1|locus|ETAC_RS16510|prediction_method|Predicted_by_at_least_one_method(IslandPath-DIMOB)	7	2.09e-41	phage-related tail protein [Xanthomonas campestris pv. campestris str. ATCC 33913]
|WP_015460856.1|locus|ETAC_RS02135|prediction_method|Predicted_by_at_least_one_method(IslandPath-DIMOB)	10	6.36e-41	phage-related major capsid protein [Xanthomonas campestris pv. campestris str. ATCC 33913]
|WP_015461704.1|locus|ETAC_RS09510|prediction_method|Predicted_by_at_least_one_method(SIGI-HMM,IslandPick)	9	1.3e-40	phage-related tail protein [Xanthomonas campestris pv. campestris str. ATCC 33913]
|WP_015461704.1|locus|ETAC_RS09510|prediction_method|Predicted_by_at_least_one_method(SIGI-HMM,IslandPick)	9	1.3e-40	phage-related tail protein [Xanthomonas campestris pv. campestris str. ATCC 33913]
|WP_015462009.1|locus|ETAC_RS11805|prediction_method|Predicted_by_at_least_one_method(IslandPick,SIGI-HMM)	12	6.78e-40	hypothetical protein c3192 [Escherichia coli CFT073]
|WP_015462009.1|locus|ETAC_RS11805|prediction_method|Predicted_by_at_least_one_method(IslandPick,SIGI-HMM)	12	6.78e-40	hypothetical protein c3192 [Escherichia coli CFT073]
|WP_015461973.1|locus|ETAC_RS11625|prediction_method|Predicted_by_at_least_one_method(SIGI-HMM)	14	4.52e-34	putative tail component encoded by cryptic prophage CP-933M; partial [Escherichia coli O157:H7 EDL933]
|WP_015460843.1|locus|ETAC_RS02075|prediction_method|Predicted_by_at_least_one_method(IslandPath-DIMOB)	13	7.11e-34	hypothetical protein STM2738 [Enterobacteria phage Fels-2]
|WP_015461727.1|locus|ETAC_RS09625|prediction_method|Predicted_by_at_least_one_method(IslandPath-DIMOB)	4	2.9e-33	DLP12 prophage; predicted antitermination protein [Escherichia coli str. K-12 substr. MG1655]
|WP_015462531.1|locus|ETAC_RS16515|prediction_method|Predicted_by_at_least_one_method(IslandPath-DIMOB)	7	1.64e-31	tail completion-like protein [Ralstonia solanacearum GMI1000]
|WP_015461849.1|locus|ETAC_RS17735|prediction_method|Predicted_by_at_least_one_method(SIGI-HMM)	65	2.45e-30	SubName: Full=PapF protein;
|WP_015461222.1|locus|ETAC_RS17210|prediction_method|Predicted_by_at_least_one_method(SIGI-HMM)	52	7.68e-30	glycosyltransferase 2
|WP_015461980.1|locus|ETAC_RS11660|prediction_method|Predicted_by_at_least_one_method(IslandPath-DIMOB)	19	1.11e-29	phage hk97 tail length tape measure-related protein [Ralstonia solanacearum GMI1000]
|WP_015461226.1|locus|ETAC_RS05740|prediction_method|Predicted_by_at_least_one_method(SIGI-HMM)	24	1.61e-29	capsular polysaccharide biosynthesis protein Cps4H [Streptococcus pneumoniae TIGR4]
|WP_015462023.1|locus|ETAC_RS11865|prediction_method|Predicted_by_at_least_one_method(IslandPick)	89	1.7e-29	site-specific recombinase, phage integrase family [Pseudomonas syringae pv. tomato str. DC3000]
|WP_015461979.1|locus|ETAC_RS11655|prediction_method|Predicted_by_at_least_one_method(IslandPath-DIMOB)	11	5.24e-29	minor tail protein [Phage Gifsy-2]
|WP_051065051.1|locus|ETAC_RS09595|prediction_method|Predicted_by_at_least_one_method(IslandPath-DIMOB,IslandPick)	6	2.24e-28	DLP12 prophage; DNA packaging protein [Escherichia coli str. K-12 substr. MG1655]
|WP_051065051.1|locus|ETAC_RS09595|prediction_method|Predicted_by_at_least_one_method(IslandPath-DIMOB,IslandPick)	6	2.24e-28	DLP12 prophage; DNA packaging protein [Escherichia coli str. K-12 substr. MG1655]
|WP_015460855.1|locus|ETAC_RS02130|prediction_method|Predicted_by_at_least_one_method(IslandPath-DIMOB)	8	1.36e-27	phage-related capsid scaffold protein [Xanthomonas campestris pv. campestris str. ATCC 33913]
|WP_015462536.1|locus|ETAC_RS16540|prediction_method|Predicted_by_at_least_one_method(IslandPath-DIMOB)	12	8.29e-26	putative phage tail protein [Salmonella enterica subsp. enterica serovar Typhi str. Ty2]
|WP_000468311.1|locus|ETAC_RS18015|prediction_method|Predicted_by_at_least_one_method(IslandPath-DIMOB)	11	1.8e-24	putative positive regulator of late gene transcription [Salmonella enterica subsp. enterica serovar Typhi str. Ty2]
|WP_071841002.1|locus|ETAC_RS09495|prediction_method|Predicted_by_at_least_one_method(SIGI-HMM,IslandPick)	13	9.67e-24	phage-related tail protein [Xanthomonas campestris pv. campestris str. ATCC 33913]
|WP_071841002.1|locus|ETAC_RS09495|prediction_method|Predicted_by_at_least_one_method(SIGI-HMM,IslandPick)	13	9.67e-24	phage-related tail protein [Xanthomonas campestris pv. campestris str. ATCC 33913]
|WP_015462342.1|locus|ETAC_RS14660|prediction_method|Predicted_by_at_least_one_method(IslandPath-DIMOB)	46	1.21e-23	PapB protein [Escherichia coli CFT073]
|WP_015461740.1|locus|ETAC_RS09680|prediction_method|Predicted_by_at_least_one_method(IslandPath-DIMOB)	9	5.62e-23	hypothetical protein STM2734 [Enterobacteria phage Fels-2]
|WP_051065069.1|locus|ETAC_RS12985|prediction_method|Predicted_by_at_least_one_method(SIGI-HMM)	17	2.48e-22	hypothetical protein CE0828 [Corynebacterium efficiens YS-314]
|WP_015461224.1|locus|ETAC_RS17215|prediction_method|Predicted_by_at_least_one_method(SIGI-HMM)	53	1.09e-21	glycosyl transferase CpsN V [Streptococcus agalactiae 2603V/R]
|WP_015461711.1|locus|ETAC_RS09540|prediction_method|Predicted_by_at_least_one_method(SIGI-HMM,IslandPath-DIMOB,IslandPick)	17	2e-21	phage-related baseplate assembly protein [Xanthomonas campestris pv. campestris str. ATCC 33913]
|WP_015461711.1|locus|ETAC_RS09540|prediction_method|Predicted_by_at_least_one_method(SIGI-HMM,IslandPath-DIMOB,IslandPick)	17	2e-21	phage-related baseplate assembly protein [Xanthomonas campestris pv. campestris str. ATCC 33913]
|WP_015461711.1|locus|ETAC_RS09540|prediction_method|Predicted_by_at_least_one_method(SIGI-HMM,IslandPath-DIMOB,IslandPick)	17	2e-21	phage-related baseplate assembly protein [Xanthomonas campestris pv. campestris str. ATCC 33913]
|WP_015460780.1|locus|ETAC_RS01420|prediction_method|Predicted_by_at_least_one_method(SIGI-HMM)	106	4.96e-20	putative ABC-type bacteriocin/lantibiotic exporter [Salmonella typhimurium LT2]
|WP_015460872.1|locus|ETAC_RS02215|prediction_method|Predicted_by_at_least_one_method(IslandPath-DIMOB)	34	8.39e-20	putative bacteriophage tail protein [Salmonella enterica subsp. enterica serovar Typhi str. Ty2]
|WP_015462025.1|locus|ETAC_RS17820|prediction_method|Predicted_by_at_least_one_method(SIGI-HMM,IslandPath-DIMOB)	18	1.98e-19	reverse transcriptase [Bacteroides thetaiotaomicron VPI-5482]
|WP_015462025.1|locus|ETAC_RS17820|prediction_method|Predicted_by_at_least_one_method(SIGI-HMM,IslandPath-DIMOB)	18	1.98e-19	reverse transcriptase [Bacteroides thetaiotaomicron VPI-5482]
|WP_015461233.1|locus|ETAC_RS17445|prediction_method|Predicted_by_at_least_one_method(SIGI-HMM)	21	3.55e-19	neuD protein [Streptococcus agalactiae 2603V/R]
|WP_015462361.1|locus|ETAC_RS14765|prediction_method|Predicted_by_at_least_one_method(IslandPath-DIMOB)	8	1.05e-17	hypothetical protein c2416 [Escherichia coli CFT073]
|WP_015462522.1|locus|ETAC_RS16465|prediction_method|Predicted_by_at_least_one_method(IslandPath-DIMOB)	49	1.33e-17	hypothetical protein RSc1916 [Ralstonia solanacearum GMI1000]
|WP_015461725.1|locus|ETAC_RS09615|prediction_method|Predicted_by_at_least_one_method(IslandPath-DIMOB)	9	1.7e-17	hypothetical protein STM1027 [Phage Gifsy-2]
|WP_071840976.1|locus|ETAC_RS17740|prediction_method|Predicted_by_at_least_one_method(SIGI-HMM)	10	3.73e-17	PrfJ protein [Escherichia coli]
|WP_015461848.1|locus|ETAC_RS17730|prediction_method|Predicted_by_at_least_one_method(SIGI-HMM)	34	4.09e-17	PrfB protein [Escherichia coli]
|WP_041692823.1|locus|ETAC_RS18050|prediction_method|Predicted_by_at_least_one_method(IslandPath-DIMOB,SIGI-HMM,IslandPick)	9	7.87e-17	hypothetical protein t4331 [Salmonella enterica subsp. enterica serovar Typhi str. Ty2]
|WP_041692823.1|locus|ETAC_RS18050|prediction_method|Predicted_by_at_least_one_method(IslandPath-DIMOB,SIGI-HMM,IslandPick)	9	7.87e-17	hypothetical protein t4331 [Salmonella enterica subsp. enterica serovar Typhi str. Ty2]
|WP_041692823.1|locus|ETAC_RS18050|prediction_method|Predicted_by_at_least_one_method(IslandPath-DIMOB,SIGI-HMM,IslandPick)	9	7.87e-17	hypothetical protein t4331 [Salmonella enterica subsp. enterica serovar Typhi str. Ty2]
|WP_015462004.1|locus|ETAC_RS11780|prediction_method|Predicted_by_at_least_one_method(IslandPick)	3	7.15e-16	hypothetical protein c3190 [Escherichia coli CFT073]
|WP_014526501.1|locus|ETAC_RS11630|prediction_method|Predicted_by_at_least_one_method(SIGI-HMM,IslandPath-DIMOB)	40	7.64e-16	putative outer membrane protein of prophage [Escherichia coli CFT073]
|WP_014526501.1|locus|ETAC_RS11630|prediction_method|Predicted_by_at_least_one_method(SIGI-HMM,IslandPath-DIMOB)	40	7.64e-16	putative outer membrane protein of prophage [Escherichia coli CFT073]
|WP_071840958.1|locus|ETAC_RS17440|prediction_method|Predicted_by_at_least_one_method(SIGI-HMM)	40	1.26e-15	epimerase/dehydratase
|WP_015462155.1|locus|ETAC_RS17885|prediction_method|Predicted_by_at_least_one_method(SIGI-HMM)	37	1.27e-15	putative transcriptional regulator [Yersinia pestis CO92]
|WP_041692764.1|locus|ETAC_RS09645|prediction_method|Predicted_by_at_least_one_method(IslandPath-DIMOB)	6	3.11e-15	antirepressor, putative [Enterococcus faecalis V583]
|WP_015462176.1|locus|ETAC_RS13205|prediction_method|Predicted_by_at_least_one_method(IslandPath-DIMOB)	18	3.5e-15	hypothetical protein gbs0095 [Streptococcus agalactiae NEM316]
|WP_041692766.1|locus|ETAC_RS09690|prediction_method|Predicted_by_at_least_one_method(IslandPath-DIMOB)|annotations|PAG	10	2.51e-14	hypothetical protein c3605 [Escherichia coli CFT073]
|WP_014524164.1|locus|ETAC_RS01410|prediction_method|Predicted_by_at_least_one_method(SIGI-HMM)	28	2.65e-14	cation efflux pump [Salmonella typhimurium LT2]
|WP_071840980.1|locus|ETAC_RS17785|prediction_method|Predicted_by_at_least_one_method(IslandPath-DIMOB)	8	3.77e-14	hypothetical protein bll0869 [Bradyrhizobium japonicum USDA 110]
|WP_001092369.1|locus|ETAC_RS17980|prediction_method|Predicted_by_at_least_one_method(IslandPath-DIMOB)	84	2.36e-13	transcriptional regulator, putative [Vibrio cholerae O1 biovar El Tor str. N16961]
|WP_015462020.1|locus|ETAC_RS11855|prediction_method|Predicted_by_at_least_one_method(IslandPick)	7	2.93e-13	hypothetical protein ECs1057 [Escherichia coli O157:H7 str. Sakai]
|WP_015461729.1|locus|ETAC_RS09635|prediction_method|Predicted_by_at_least_one_method(IslandPath-DIMOB)	5	2.02e-12	putative phage replication protein [Escherichia coli O157:H7 str. Sakai]
|WP_015461225.1|locus|ETAC_RS05735|prediction_method|Predicted_by_at_least_one_method(SIGI-HMM)	26	2.17e-12	putative glycosyl transferase [Bordetella pertussis Tohama I]
|WP_015461850.1|locus|ETAC_RS10620|prediction_method|Predicted_by_at_least_one_method(SIGI-HMM)	83	2.6e-12	RecName: Full=Peptidyl-prolyl cis-trans isomerase; EC=5.2.1.8;
|WP_015462152.1|locus|ETAC_RS17880|prediction_method|Predicted_by_at_least_one_method(SIGI-HMM)	6	4.13e-12	hypothetical protein Z1197 [Escherichia coli O157:H7 EDL933]
|WP_015462521.1|locus|ETAC_RS18020|prediction_method|Predicted_by_at_least_one_method(IslandPath-DIMOB)	13	5.65e-12	hypothetical protein XCC2991 [Xanthomonas campestris pv. campestris str. ATCC 33913]
|WP_015461707.1|locus|ETAC_RS17240|prediction_method|Predicted_by_at_least_one_method(SIGI-HMM,IslandPath-DIMOB)	11	8.92e-12	Phage tail sheath protein FI [Vibrio vulnificus CMCP6]
|WP_015461707.1|locus|ETAC_RS17240|prediction_method|Predicted_by_at_least_one_method(SIGI-HMM,IslandPath-DIMOB)	11	8.92e-12	Phage tail sheath protein FI [Vibrio vulnificus CMCP6]
|WP_015460874.1|locus|ETAC_RS02225|prediction_method|Predicted_by_at_least_one_method(IslandPath-DIMOB)	2	1.49e-11	A/G-specific DNA glycosylase [Vibrio vulnificus CMCP6]
|WP_015462524.1|locus|ETAC_RS18025|prediction_method|Predicted_by_at_least_one_method(IslandPath-DIMOB)	27	2.84e-11	hypothetical protein Z0315 [Escherichia coli O157:H7 EDL933]
|WP_041692729.1|locus|ETAC_RS05780|prediction_method|Predicted_by_at_least_one_method(SIGI-HMM)	2	3.48e-11	polysaccharide biosynthesis protein CpsL [Streptococcus agalactiae 2603V/R]
|WP_015460871.1|locus|ETAC_RS02210|prediction_method|Predicted_by_at_least_one_method(IslandPath-DIMOB)	16	3.6e-11	Phage-related tail fiber protein [Vibrio vulnificus CMCP6]
|WP_041692760.1|locus|ETAC_RS09530|prediction_method|Predicted_by_at_least_one_method(SIGI-HMM,IslandPath-DIMOB)	6	2.47e-10	putative tail fiber-related protein [Ralstonia solanacearum GMI1000]
|WP_041692760.1|locus|ETAC_RS09530|prediction_method|Predicted_by_at_least_one_method(SIGI-HMM,IslandPath-DIMOB)	6	2.47e-10	putative tail fiber-related protein [Ralstonia solanacearum GMI1000]
|WP_015461702.1|locus|ETAC_RS09500|prediction_method|Predicted_by_at_least_one_method(SIGI-HMM,IslandPick)	11	3.77e-10	phage-related tail protein [Xanthomonas campestris pv. campestris str. ATCC 33913]
|WP_015461702.1|locus|ETAC_RS09500|prediction_method|Predicted_by_at_least_one_method(SIGI-HMM,IslandPick)	11	3.77e-10	phage-related tail protein [Xanthomonas campestris pv. campestris str. ATCC 33913]
|WP_041692899.1|locus|ETAC_RS14685|prediction_method|Predicted_by_at_least_one_method(IslandPath-DIMOB,SIGI-HMM)	15	2.88e-09	hypothetical protein bsl1589 [Bradyrhizobium japonicum USDA 110]
|WP_041692899.1|locus|ETAC_RS14685|prediction_method|Predicted_by_at_least_one_method(IslandPath-DIMOB,SIGI-HMM)	15	2.88e-09	hypothetical protein bsl1589 [Bradyrhizobium japonicum USDA 110]
|WP_012848441.1|locus|ETAC_RS07515|prediction_method|Predicted_by_at_least_one_method(SIGI-HMM)	3	4.43e-09	hypothetical protein PP_2481 [Pseudomonas putida KT2440]
|WP_041692833.1|locus|ETAC_RS02145|prediction_method|Predicted_by_at_least_one_method(IslandPath-DIMOB)	5	7.9e-09	bacteriophage protein [Ralstonia solanacearum GMI1000]
|WP_015461986.1|locus|ETAC_RS11690|prediction_method|Predicted_by_at_least_one_method(SIGI-HMM)	6	1.75e-08	hypothetical protein RSc1685 [Ralstonia solanacearum GMI1000]
|WP_001437784.1|locus|ETAC_RS16535|prediction_method|Predicted_by_at_least_one_method(IslandPath-DIMOB)	4	1.81e-08	phage-holin-like protein [Salmonella enterica subsp. enterica serovar Typhimurium str. LT2]
|WP_015461739.1|locus|ETAC_RS09675|prediction_method|Predicted_by_at_least_one_method(IslandPath-DIMOB)	4	1.22e-07	hypothetical protein BMEI1681 [Brucella melitensis bv. 1 str. 16M]
|WP_015461417.1|locus|ETAC_RS17535|prediction_method|Predicted_by_at_least_one_method(SIGI-HMM)	3	1.31e-07	inner membrane protein, putative [Vibrio cholerae O1 biovar El Tor str. N16961]
|WP_034165303.1|locus|ETAC_RS17670|prediction_method|Predicted_by_at_least_one_method(IslandPath-DIMOB)	4	1.37e-07	hypothetical protein BR0974 [Brucella suis 1330]
|WP_015461736.1|locus|ETAC_RS17675|prediction_method|Predicted_by_at_least_one_method(IslandPath-DIMOB)	23	2.25e-07	putative cell division control protein [Escherichia coli O157:H7 str. Sakai]
|WP_015460852.1|locus|ETAC_RS02115|prediction_method|Predicted_by_at_least_one_method(IslandPath-DIMOB)	11	2.44e-07	putative transcriptional activator transcription regulator protein [Ralstonia solanacearum GMI1000]
|WP_015460857.1|locus|ETAC_RS02140|prediction_method|Predicted_by_at_least_one_method(IslandPath-DIMOB)	81	3.61e-07	phage-related terminase [Xanthomonas campestris pv. campestris str. ATCC 33913]
|WP_015462013.1|locus|ETAC_RS11820|prediction_method|Predicted_by_at_least_one_method(IslandPick,SIGI-HMM,IslandPath-DIMOB)	33	3.8e-07	prophage Lp2 protein 9 [Lactobacillus plantarum WCFS1]
|WP_015462013.1|locus|ETAC_RS11820|prediction_method|Predicted_by_at_least_one_method(IslandPick,SIGI-HMM,IslandPath-DIMOB)	33	3.8e-07	prophage Lp2 protein 9 [Lactobacillus plantarum WCFS1]
|WP_015462013.1|locus|ETAC_RS11820|prediction_method|Predicted_by_at_least_one_method(IslandPick,SIGI-HMM,IslandPath-DIMOB)	33	3.8e-07	prophage Lp2 protein 9 [Lactobacillus plantarum WCFS1]
|WP_015461712.1|locus|ETAC_RS09545|prediction_method|Predicted_by_at_least_one_method(SIGI-HMM,IslandPath-DIMOB,IslandPick)	11	5.15e-07	dTDP-glucose pyrophosphorylase [Vibrio vulnificus CMCP6]
|WP_015461712.1|locus|ETAC_RS09545|prediction_method|Predicted_by_at_least_one_method(SIGI-HMM,IslandPath-DIMOB,IslandPick)	11	5.15e-07	dTDP-glucose pyrophosphorylase [Vibrio vulnificus CMCP6]
|WP_015461712.1|locus|ETAC_RS09545|prediction_method|Predicted_by_at_least_one_method(SIGI-HMM,IslandPath-DIMOB,IslandPick)	11	5.15e-07	dTDP-glucose pyrophosphorylase [Vibrio vulnificus CMCP6]
|WP_071840959.1|locus|ETAC_RS17460|prediction_method|Predicted_by_at_least_one_method(SIGI-HMM)	5	7.29e-07	exopolysaccharide production protein EXOZ [Mesorhizobium loti MAFF303099]
|WP_015462007.1|locus|ETAC_RS11795|prediction_method|Predicted_by_at_least_one_method(IslandPick)	5	1.27e-06	orf, hypothetical protein [Escherichia coli K12]
|WP_015461713.1|locus|ETAC_RS17245|prediction_method|Predicted_by_at_least_one_method(SIGI-HMM,IslandPath-DIMOB,IslandPick)	16	2.08e-06	phage-related baseplate protein [Xanthomonas campestris pv. campestris str. ATCC 33913]
|WP_015461713.1|locus|ETAC_RS17245|prediction_method|Predicted_by_at_least_one_method(SIGI-HMM,IslandPath-DIMOB,IslandPick)	16	2.08e-06	phage-related baseplate protein [Xanthomonas campestris pv. campestris str. ATCC 33913]
|WP_015461713.1|locus|ETAC_RS17245|prediction_method|Predicted_by_at_least_one_method(SIGI-HMM,IslandPath-DIMOB,IslandPick)	16	2.08e-06	phage-related baseplate protein [Xanthomonas campestris pv. campestris str. ATCC 33913]
|WP_015461735.1|locus|ETAC_RS09665|prediction_method|Predicted_by_at_least_one_method(IslandPath-DIMOB)	8	3.11e-06	hypothetical protein c3195 [Escherichia coli CFT073]
|WP_015461034.1|locus|ETAC_RS17355|prediction_method|Predicted_by_at_least_one_method(IslandPath-DIMOB,SIGI-HMM)	22	4.07e-06	putative DNA helicase [Salmonella enterica subsp. enterica serovar Typhi str. Ty2]
|WP_015461034.1|locus|ETAC_RS17355|prediction_method|Predicted_by_at_least_one_method(IslandPath-DIMOB,SIGI-HMM)	22	4.07e-06	putative DNA helicase [Salmonella enterica subsp. enterica serovar Typhi str. Ty2]
|WP_015461227.1|locus|ETAC_RS05745|prediction_method|Predicted_by_at_least_one_method(SIGI-HMM)	50	7.46e-06	capsular polysaccharide biosynthesis protein Cps4H [Streptococcus pneumoniae TIGR4]
|WP_015461710.1|locus|ETAC_RS09535|prediction_method|Predicted_by_at_least_one_method(SIGI-HMM,IslandPath-DIMOB,IslandPick)	8	1.87e-05	phage-related tail protein [Xanthomonas campestris pv. campestris str. ATCC 33913]
|WP_015461710.1|locus|ETAC_RS09535|prediction_method|Predicted_by_at_least_one_method(SIGI-HMM,IslandPath-DIMOB,IslandPick)	8	1.87e-05	phage-related tail protein [Xanthomonas campestris pv. campestris str. ATCC 33913]
|WP_015461710.1|locus|ETAC_RS09535|prediction_method|Predicted_by_at_least_one_method(SIGI-HMM,IslandPath-DIMOB,IslandPick)	8	1.87e-05	phage-related tail protein [Xanthomonas campestris pv. campestris str. ATCC 33913]
|WP_015461703.1|locus|ETAC_RS09505|prediction_method|Predicted_by_at_least_one_method(SIGI-HMM,IslandPick)	9	2.1e-05	phage-like tail protein [Ralstonia solanacearum GMI1000]
|WP_015461703.1|locus|ETAC_RS09505|prediction_method|Predicted_by_at_least_one_method(SIGI-HMM,IslandPick)	9	2.1e-05	phage-like tail protein [Ralstonia solanacearum GMI1000]
|WP_015462550.1|locus|ETAC_RS16615|prediction_method|Predicted_by_at_least_one_method(IslandPath-DIMOB,SIGI-HMM,IslandPick)	14	3.8e-05	hypothetical protein STM2732 [Salmonella enterica subsp. enterica serovar Typhimurium str. LT2]
|WP_015462550.1|locus|ETAC_RS16615|prediction_method|Predicted_by_at_least_one_method(IslandPath-DIMOB,SIGI-HMM,IslandPick)	14	3.8e-05	hypothetical protein STM2732 [Salmonella enterica subsp. enterica serovar Typhimurium str. LT2]
|WP_015462550.1|locus|ETAC_RS16615|prediction_method|Predicted_by_at_least_one_method(IslandPath-DIMOB,SIGI-HMM,IslandPick)	14	3.8e-05	hypothetical protein STM2732 [Salmonella enterica subsp. enterica serovar Typhimurium str. LT2]
|WP_071840953.1|locus|ETAC_RS17375|prediction_method|Predicted_by_at_least_one_method(IslandPath-DIMOB)	3	5.4e-05	hypothetical protein c1206 [Escherichia coli CFT073]
|WP_012849905.1|locus|ETAC_RS14780|prediction_method|Predicted_by_at_least_one_method(IslandPath-DIMOB)	10	6.19e-05	enhanced entry protein EnhA [Legionella pneumophila subsp. pneumophila str. Philadelphia 1]
|WP_015462354.1|locus|ETAC_RS14725|prediction_method|Predicted_by_at_least_one_method(IslandPath-DIMOB,SIGI-HMM)	5	0.000102	putative mobilization protein [Bacteroides thetaiotaomicron VPI-5482]
|WP_015462354.1|locus|ETAC_RS14725|prediction_method|Predicted_by_at_least_one_method(IslandPath-DIMOB,SIGI-HMM)	5	0.000102	putative mobilization protein [Bacteroides thetaiotaomicron VPI-5482]
|WP_041692809.1|locus|ETAC_RS14745|prediction_method|Predicted_by_at_least_one_method(IslandPath-DIMOB,SIGI-HMM)	41	0.000111	integrase INTI1 [Pseudomonas aeruginosa]
|WP_041692809.1|locus|ETAC_RS14745|prediction_method|Predicted_by_at_least_one_method(IslandPath-DIMOB,SIGI-HMM)	41	0.000111	integrase INTI1 [Pseudomonas aeruginosa]
|WP_041692824.1|locus|ETAC_RS18060|prediction_method|Predicted_by_at_least_one_method(IslandPath-DIMOB,IslandPick)	18	0.000111	hypothetical protein lin0073 [Listeria innocua Clip11262]
|WP_041692824.1|locus|ETAC_RS18060|prediction_method|Predicted_by_at_least_one_method(IslandPath-DIMOB,IslandPick)	18	0.000111	hypothetical protein lin0073 [Listeria innocua Clip11262]
|WP_071840948.1|locus|ETAC_RS17320|prediction_method|Predicted_by_at_least_one_method(IslandPath-DIMOB)	21	0.000125	hypothetical protein t4334 [Salmonella enterica subsp. enterica serovar Typhi str. Ty2]
|WP_015462011.1|locus|ETAC_RS11810|prediction_method|Predicted_by_at_least_one_method(IslandPick,SIGI-HMM,IslandPath-DIMOB)	15	0.000331	hypothetical protein c3195 [Escherichia coli CFT073]
|WP_015462011.1|locus|ETAC_RS11810|prediction_method|Predicted_by_at_least_one_method(IslandPick,SIGI-HMM,IslandPath-DIMOB)	15	0.000331	hypothetical protein c3195 [Escherichia coli CFT073]
|WP_015462011.1|locus|ETAC_RS11810|prediction_method|Predicted_by_at_least_one_method(IslandPick,SIGI-HMM,IslandPath-DIMOB)	15	0.000331	hypothetical protein c3195 [Escherichia coli CFT073]
|WP_015461732.1|locus|ETAC_RS09650|prediction_method|Predicted_by_at_least_one_method(IslandPath-DIMOB)	2	0.000442	hypothetical protein BMEI1004 [Brucella melitensis bv. 1 str. 16M]
|WP_015462359.1|locus|ETAC_RS14750|prediction_method|Predicted_by_at_least_one_method(IslandPath-DIMOB,SIGI-HMM)	63	0.000586	phage integrase family site specific recombinase [Enterococcus faecalis V583]
|WP_015462359.1|locus|ETAC_RS14750|prediction_method|Predicted_by_at_least_one_method(IslandPath-DIMOB,SIGI-HMM)	63	0.000586	phage integrase family site specific recombinase [Enterococcus faecalis V583]
|WP_015460844.1|locus|ETAC_RS02080|prediction_method|Predicted_by_at_least_one_method(IslandPath-DIMOB)	9	0.00061	putative DNA-binding protein [Escherichia coli O157:H7 str. Sakai]
|WP_015462178.1|locus|ETAC_RS13215|prediction_method|Predicted_by_at_least_one_method(IslandPath-DIMOB)	15	0.000614	hypothetical protein blr1666 [Bradyrhizobium japonicum USDA 110]
|WP_015462352.1|locus|ETAC_RS14710|prediction_method|Predicted_by_at_least_one_method(IslandPath-DIMOB,SIGI-HMM)	11	0.000788	hypothetical protein SMc02154 [Sinorhizobium meliloti 1021]
|WP_015462352.1|locus|ETAC_RS14710|prediction_method|Predicted_by_at_least_one_method(IslandPath-DIMOB,SIGI-HMM)	11	0.000788	hypothetical protein SMc02154 [Sinorhizobium meliloti 1021]
|WP_015462008.1|locus|ETAC_RS11800|prediction_method|Predicted_by_at_least_one_method(IslandPick)	4	0.000806	hypothetical protein c3191 [Escherichia coli CFT073]
|WP_015461418.1|locus|ETAC_RS07520|prediction_method|Predicted_by_at_least_one_method(SIGI-HMM)	5	0.000925	RecName: Full=Glutathione transferase fosA; AltName: Full=Fosfomycin resistance protein
|WP_015460875.1|locus|ETAC_RS02230|prediction_method|Predicted_by_at_least_one_method(IslandPath-DIMOB)	11	0.00103	VgrG1 [Pseudomonas aeruginosa PAO1]
|WP_015461669.1|locus|ETAC_RS17600|prediction_method|Predicted_by_at_least_one_method(SIGI-HMM)	7	0.00139	isopropylmalate isomerase small subunit [Mycobacterium tuberculosis H37Rv]
|WP_015461717.1|locus|ETAC_RS09570|prediction_method|Predicted_by_at_least_one_method(SIGI-HMM,IslandPath-DIMOB,IslandPick)	9	0.00157	hypothetical protein Z3091 [Escherichia coli O157:H7 EDL933]
|WP_015461717.1|locus|ETAC_RS09570|prediction_method|Predicted_by_at_least_one_method(SIGI-HMM,IslandPath-DIMOB,IslandPick)	9	0.00157	hypothetical protein Z3091 [Escherichia coli O157:H7 EDL933]
|WP_015461717.1|locus|ETAC_RS09570|prediction_method|Predicted_by_at_least_one_method(SIGI-HMM,IslandPath-DIMOB,IslandPick)	9	0.00157	hypothetical protein Z3091 [Escherichia coli O157:H7 EDL933]
|WP_015462532.1|locus|ETAC_RS18030|prediction_method|Predicted_by_at_least_one_method(IslandPath-DIMOB)	3	0.00257	hypothetical protein STM2713 [Salmonella enterica subsp. enterica serovar Typhimurium str. LT2]
|WP_015460847.1|locus|ETAC_RS02095|prediction_method|Predicted_by_at_least_one_method(IslandPath-DIMOB)	15	0.0077	trans-sialidase [Trypanosoma cruzi strain CL Brener]
|WP_071840973.1|locus|ETAC_RS17665|prediction_method|Predicted_by_at_least_one_method(IslandPath-DIMOB)	10	0.00851	hypothetical protein c3191 [Escherichia coli CFT073]
|WP_015462351.1|locus|ETAC_RS14705|prediction_method|Predicted_by_at_least_one_method(IslandPath-DIMOB,SIGI-HMM)	14	0.01	site-specific DNA-methyltransferase [Xanthomonas campestris pv. campestris str. ATCC 33913]
|WP_015462351.1|locus|ETAC_RS14705|prediction_method|Predicted_by_at_least_one_method(IslandPath-DIMOB,SIGI-HMM)	14	0.01	site-specific DNA-methyltransferase [Xanthomonas campestris pv. campestris str. ATCC 33913]
|WP_051065045.1|locus|ETAC_RS02190|prediction_method|Predicted_by_at_least_one_method(IslandPath-DIMOB)	6	0.02	putative tail protein [Escherichia coli O157:H7]
|WP_015462022.1|locus|ETAC_RS17815|prediction_method|Predicted_by_at_least_one_method(IslandPick)	15	0.02	transcriptional regulator, putative [Vibrio cholerae O1 biovar El Tor str. N16961]
|WP_015461035.1|locus|ETAC_RS17360|prediction_method|Predicted_by_at_least_one_method(IslandPath-DIMOB,SIGI-HMM)	14	0.02	ATP-binding protein [Streptomyces coelicolor A3 2 ]
|WP_015461035.1|locus|ETAC_RS17360|prediction_method|Predicted_by_at_least_one_method(IslandPath-DIMOB,SIGI-HMM)	14	0.02	ATP-binding protein [Streptomyces coelicolor A3 2 ]
|WP_015462533.1|locus|ETAC_RS16520|prediction_method|Predicted_by_at_least_one_method(IslandPath-DIMOB)	10	0.03	lysis-like protein [Salmonella enterica subsp. enterica serovar Typhimurium str. LT2]
|WP_071840983.1|locus|ETAC_RS17810|prediction_method|Predicted_by_at_least_one_method(IslandPick)	13	0.03	prophage P4 integrase [Escherichia coli CFT073]
|WP_015462179.1|locus|ETAC_RS13225|prediction_method|Predicted_by_at_least_one_method(IslandPath-DIMOB)	5	0.04	regulatory protein [Streptomyces coelicolor A3 2 ]
|WP_015460869.1|locus|ETAC_RS02200|prediction_method|Predicted_by_at_least_one_method(IslandPath-DIMOB)	11	0.05	phage FluMu protein gp47 [Pseudomonas putida KT2440]
|WP_015461988.1|locus|ETAC_RS11700|prediction_method|Predicted_by_at_least_one_method(SIGI-HMM)	7	0.06	major head protein precursor [Lactococcus lactis subsp. lactis Il1403]
|WP_015462355.1|locus|ETAC_RS14730|prediction_method|Predicted_by_at_least_one_method(IslandPath-DIMOB,SIGI-HMM)	6	0.07	hypothetical protein c2404 [Escherichia coli CFT073]
|WP_015462355.1|locus|ETAC_RS14730|prediction_method|Predicted_by_at_least_one_method(IslandPath-DIMOB,SIGI-HMM)	6	0.07	hypothetical protein c2404 [Escherichia coli CFT073]
|WP_071840974.1|locus|ETAC_RS17685|prediction_method|Predicted_by_at_least_one_method(IslandPath-DIMOB)	4	0.09	hypothetical protein BT_2579 [Bacteroides thetaiotaomicron VPI-5482]
|WP_015462534.1|locus|ETAC_RS16525|prediction_method|Predicted_by_at_least_one_method(IslandPath-DIMOB)	2	0.1	hypothetical protein t4313 [Salmonella enterica subsp. enterica serovar Typhi str. Ty2]
|WP_015462012.1|locus|ETAC_RS11815|prediction_method|Predicted_by_at_least_one_method(IslandPick,SIGI-HMM,IslandPath-DIMOB)	8	0.1	hypothetical protein Atu0444 [Agrobacterium tumefaciens str. C58]
|WP_015462012.1|locus|ETAC_RS11815|prediction_method|Predicted_by_at_least_one_method(IslandPick,SIGI-HMM,IslandPath-DIMOB)	8	0.1	hypothetical protein Atu0444 [Agrobacterium tumefaciens str. C58]
|WP_015462012.1|locus|ETAC_RS11815|prediction_method|Predicted_by_at_least_one_method(IslandPick,SIGI-HMM,IslandPath-DIMOB)	8	0.1	hypothetical protein Atu0444 [Agrobacterium tumefaciens str. C58]
|WP_071818541.1|locus|ETAC_RS17985|prediction_method|Predicted_by_at_least_one_method(IslandPath-DIMOB)	7	0.11	Putative peptide synthetase [Escherichia coli CFT073]
|WP_015462026.1|locus|ETAC_RS11885|prediction_method|Predicted_by_at_least_one_method(SIGI-HMM,IslandPath-DIMOB)	12	0.12	SubName: Full=CrmD or CPXV221 protein; SubName: Full=Tumor necrosis factor receptor II homolog;
|WP_015462026.1|locus|ETAC_RS11885|prediction_method|Predicted_by_at_least_one_method(SIGI-HMM,IslandPath-DIMOB)	12	0.12	SubName: Full=CrmD or CPXV221 protein; SubName: Full=Tumor necrosis factor receptor II homolog;
|WP_071840996.1|locus|ETAC_RS18055|prediction_method|Predicted_by_at_least_one_method(IslandPath-DIMOB,IslandPick)	4	0.12	2,4-dihydroxyhept-2-ene-1,7-dioic acid aldolase [Salmonella enterica subsp. enterica serovar Typhi str. Ty2]
|WP_071840996.1|locus|ETAC_RS18055|prediction_method|Predicted_by_at_least_one_method(IslandPath-DIMOB,IslandPick)	4	0.12	2,4-dihydroxyhept-2-ene-1,7-dioic acid aldolase [Salmonella enterica subsp. enterica serovar Typhi str. Ty2]
|WP_071840963.1|locus|ETAC_RS07525|prediction_method|Predicted_by_at_least_one_method(SIGI-HMM)	32	0.18	putative integrase [Escherichia coli O157:H7 str. Sakai]
|WP_071841003.1|locus|ETAC_RS17690|prediction_method|Predicted_by_at_least_one_method(IslandPath-DIMOB)	8	0.19	RecName: Full=Lethal factor; Short=LF; EC=3.4.24.83; AltName: Full=Anthrax lethal toxin endopeptidase component; Flags: Precursor;
|WP_071818531.1|locus|ETAC_RS13230|prediction_method|Predicted_by_at_least_one_method(IslandPath-DIMOB)	9	0.23	RecName: Full=Zinc metalloproteinase/disintegrin; Contains: RecName: Full=Hemorrhagic metalloproteinase HR2a; EC=3.4.24.53; AltName: Full=Trimerelysin II; RecName: Full=Disintegrin flavostatin; AltName: Full=Platelet aggregation activation inhibitor; Flag
|WP_015460777.1|locus|ETAC_RS01400|prediction_method|Predicted_by_at_least_one_method(SIGI-HMM)	4	0.27	putative methyl-accepting chemotaxis protein [Salmonella typhimurium LT2]
|WP_034168692.1|locus|ETAC_RS14695|prediction_method|Predicted_by_at_least_one_method(IslandPath-DIMOB,SIGI-HMM)	6	0.29	RecName: Full=Phosphoenolpyruvate-protein phosphotransferase; EC=2.7.3.9; AltName: Full=Phosphotransferase system, enzyme I;
|WP_034168692.1|locus|ETAC_RS14695|prediction_method|Predicted_by_at_least_one_method(IslandPath-DIMOB,SIGI-HMM)	6	0.29	RecName: Full=Phosphoenolpyruvate-protein phosphotransferase; EC=2.7.3.9; AltName: Full=Phosphotransferase system, enzyme I;
|WP_012849565.1|locus|ETAC_RS13220|prediction_method|Predicted_by_at_least_one_method(IslandPath-DIMOB)	9	0.31	putative collagen binding protein [Streptococcus pyogenes MGAS315]
|WP_015462010.1|locus|ETAC_RS17800|prediction_method|Predicted_by_at_least_one_method(IslandPick,SIGI-HMM,IslandPath-DIMOB)	11	0.34	RecName: Full=Sphingomyelin phosphodiesterase D LspiSicTox-betaIE1ii; Short=SMD; Short=SMase D; Short=Sphingomyelinase D; EC=3.1.4.41; Flags: Fragment;
|WP_015462010.1|locus|ETAC_RS17800|prediction_method|Predicted_by_at_least_one_method(IslandPick,SIGI-HMM,IslandPath-DIMOB)	11	0.34	RecName: Full=Sphingomyelin phosphodiesterase D LspiSicTox-betaIE1ii; Short=SMD; Short=SMase D; Short=Sphingomyelinase D; EC=3.1.4.41; Flags: Fragment;
|WP_015462010.1|locus|ETAC_RS17800|prediction_method|Predicted_by_at_least_one_method(IslandPick,SIGI-HMM,IslandPath-DIMOB)	11	0.34	RecName: Full=Sphingomyelin phosphodiesterase D LspiSicTox-betaIE1ii; Short=SMD; Short=SMase D; Short=Sphingomyelinase D; EC=3.1.4.41; Flags: Fragment;
|WP_015461031.1|locus|ETAC_RS03945|prediction_method|Predicted_by_at_least_one_method(IslandPath-DIMOB)	8	0.37	erythrocyte membrane protein 1 PfEMP1 [Plasmodium falciparum 3D7]
|WP_071841004.1|locus|ETAC_RS17770|prediction_method|Predicted_by_at_least_one_method(SIGI-HMM)	3	0.37	prophage pi3 protein 50 [Lactococcus lactis subsp. lactis Il1403]
|WP_041692873.1|locus|ETAC_RS09655|prediction_method|Predicted_by_at_least_one_method(IslandPath-DIMOB)	2	0.42	SubName: Full=HrcC protein; Flags: Precursor;
|WP_015461714.1|locus|ETAC_RS09555|prediction_method|Predicted_by_at_least_one_method(SIGI-HMM,IslandPath-DIMOB,IslandPick)	66	0.44	RecName: Full=U3-lycotoxin-Ls1a; AltName: Full=Toxin-like structure LSTX-B20; Flags: Precursor;
|WP_015461714.1|locus|ETAC_RS09555|prediction_method|Predicted_by_at_least_one_method(SIGI-HMM,IslandPath-DIMOB,IslandPick)	66	0.44	RecName: Full=U3-lycotoxin-Ls1a; AltName: Full=Toxin-like structure LSTX-B20; Flags: Precursor;
|WP_015461714.1|locus|ETAC_RS09555|prediction_method|Predicted_by_at_least_one_method(SIGI-HMM,IslandPath-DIMOB,IslandPick)	66	0.44	RecName: Full=U3-lycotoxin-Ls1a; AltName: Full=Toxin-like structure LSTX-B20; Flags: Precursor;
|WP_015460864.1|locus|ETAC_RS02175|prediction_method|Predicted_by_at_least_one_method(IslandPath-DIMOB)	6	0.47	L-alanoyl-D-glutamate peptidase [Listeria innocua Clip11262]
|WP_015462021.1|locus|ETAC_RS11860|prediction_method|Predicted_by_at_least_one_method(IslandPick)	2	0.49	trans-sialidase [Trypanosoma cruzi strain CL Brener]
|WP_071840979.1|locus|ETAC_RS17775|prediction_method|Predicted_by_at_least_one_method(SIGI-HMM,IslandPath-DIMOB)	1	0.49	RecName: Full=Arginine deiminase; Short=ADI; EC=3.5.3.6; AltName: Full=Arginine dihydrolase; Short=AD;
|WP_071840979.1|locus|ETAC_RS17775|prediction_method|Predicted_by_at_least_one_method(SIGI-HMM,IslandPath-DIMOB)	1	0.49	RecName: Full=Arginine deiminase; Short=ADI; EC=3.5.3.6; AltName: Full=Arginine dihydrolase; Short=AD;
|WP_051065057.1|locus|ETAC_RS17255|prediction_method|Predicted_by_at_least_one_method(IslandPath-DIMOB,SIGI-HMM)	5	0.5	ferrous iron transporter B [Legionella pneumophila subsp. pneumophila str. Philadelphia 1]
|WP_051065057.1|locus|ETAC_RS17255|prediction_method|Predicted_by_at_least_one_method(IslandPath-DIMOB,SIGI-HMM)	5	0.5	ferrous iron transporter B [Legionella pneumophila subsp. pneumophila str. Philadelphia 1]
|WP_015462356.1|locus|ETAC_RS14735|prediction_method|Predicted_by_at_least_one_method(IslandPath-DIMOB,SIGI-HMM)	6	0.53	erythrocyte membrane protein 1 PfEMP1 [Plasmodium falciparum 3D7]
|WP_015462356.1|locus|ETAC_RS14735|prediction_method|Predicted_by_at_least_one_method(IslandPath-DIMOB,SIGI-HMM)	6	0.53	erythrocyte membrane protein 1 PfEMP1 [Plasmodium falciparum 3D7]
|WP_041692703.1|locus|ETAC_RS02165|prediction_method|Predicted_by_at_least_one_method(IslandPath-DIMOB)	3	0.57	hypothetical protein BH3519 [Bacillus halodurans C-125]
|WP_015462545.1|locus|ETAC_RS16590|prediction_method|Predicted_by_at_least_one_method(IslandPath-DIMOB,SIGI-HMM)	10	0.63	hypothetical protein EF2529 [Enterococcus faecalis V583]
|WP_015462545.1|locus|ETAC_RS16590|prediction_method|Predicted_by_at_least_one_method(IslandPath-DIMOB,SIGI-HMM)	10	0.63	hypothetical protein EF2529 [Enterococcus faecalis V583]
|WP_015462345.1|locus|ETAC_RS14675|prediction_method|Predicted_by_at_least_one_method(IslandPath-DIMOB,SIGI-HMM)	4	0.65	ATPase
|WP_015462345.1|locus|ETAC_RS14675|prediction_method|Predicted_by_at_least_one_method(IslandPath-DIMOB,SIGI-HMM)	4	0.65	ATPase
|WP_015461744.1|locus|ETAC_RS17705|prediction_method|Predicted_by_at_least_one_method(IslandPath-DIMOB)	6	0.68	trans-sialidase [Trypanosoma cruzi strain CL Brener]
|WP_041692761.1|locus|ETAC_RS09560|prediction_method|Predicted_by_at_least_one_method(SIGI-HMM,IslandPath-DIMOB,IslandPick)	4	0.73	RecName: Full=Protein translocase subunit SecA 1;
|WP_041692761.1|locus|ETAC_RS09560|prediction_method|Predicted_by_at_least_one_method(SIGI-HMM,IslandPath-DIMOB,IslandPick)	4	0.73	RecName: Full=Protein translocase subunit SecA 1;
|WP_041692761.1|locus|ETAC_RS09560|prediction_method|Predicted_by_at_least_one_method(SIGI-HMM,IslandPath-DIMOB,IslandPick)	4	0.73	RecName: Full=Protein translocase subunit SecA 1;
|WP_015461040.1|locus|ETAC_RS03980|prediction_method|Predicted_by_at_least_one_method(IslandPath-DIMOB)	8	0.74	hypothetical protein CE0854 [Corynebacterium efficiens YS-314]
|WP_041692820.1|locus|ETAC_RS16580|prediction_method|Predicted_by_at_least_one_method(IslandPath-DIMOB)|annotations|PAG	7	0.76	phospholipase A2-II [Daboia russellii russellii]
|WP_051065055.1|locus|ETAC_RS11835|prediction_method|Predicted_by_at_least_one_method(IslandPick)	16	0.77	SubName: Full=Epstein-Barr virus mRNA T2 of 84 kb transcription unit transcript of viral genome US,IR and UL regions ;
|WP_015461723.1|locus|ETAC_RS09600|prediction_method|Predicted_by_at_least_one_method(IslandPath-DIMOB,IslandPick)|annotations|PAG	3	0.8	type III secretion apparatus component [Yersinia pestis CO92]
|WP_015461723.1|locus|ETAC_RS09600|prediction_method|Predicted_by_at_least_one_method(IslandPath-DIMOB,IslandPick)|annotations|PAG	3	0.8	type III secretion apparatus component [Yersinia pestis CO92]
|WP_015462151.1|locus|ETAC_RS12980|prediction_method|Predicted_by_at_least_one_method(SIGI-HMM)	2	0.87	putative inner membrane protein [Salmonella typhimurium LT2]
|WP_015462019.1|locus|ETAC_RS11850|prediction_method|Predicted_by_at_least_one_method(IslandPick)	7	0.88	RecName: Full=Serine protease espP; EC=3.4.21.-; Contains: RecName: Full=Secreted autotransporter protein espP; AltName: Full=Extracellular serine protease plasmid-encoded espP; RecName: Full=Autotransporter protein espP translocator; Flags: Precursor;
|WP_001583792.1|locus|ETAC_RS16620|prediction_method|Predicted_by_at_least_one_method(IslandPath-DIMOB,IslandPick)	10	0.91	UDP-N-acetylglucosamine 2-epimerase [Bordetella pertussis Tohama I]
|WP_001583792.1|locus|ETAC_RS16620|prediction_method|Predicted_by_at_least_one_method(IslandPath-DIMOB,IslandPick)	10	0.91	UDP-N-acetylglucosamine 2-epimerase [Bordetella pertussis Tohama I]
|WP_041692763.1|locus|ETAC_RS17655|prediction_method|Predicted_by_at_least_one_method(IslandPath-DIMOB,IslandPick)	3	0.96	phage-like protein [Ralstonia solanacearum GMI1000]
|WP_041692763.1|locus|ETAC_RS17655|prediction_method|Predicted_by_at_least_one_method(IslandPath-DIMOB,IslandPick)	3	0.96	phage-like protein [Ralstonia solanacearum GMI1000]
|WP_015461984.1|locus|ETAC_RS11680|prediction_method|Predicted_by_at_least_one_method(SIGI-HMM)	18	1.07	hypothetical protein YPO1905a [Yersinia pestis CO92]
|WP_015460868.1|locus|ETAC_RS02195|prediction_method|Predicted_by_at_least_one_method(IslandPath-DIMOB)	1	1.15	triosephosphate isomerase [Pseudomonas aeruginosa PAO1]
|WP_015462030.1|locus|ETAC_RS11910|prediction_method|Predicted_by_at_least_one_method(IslandPath-DIMOB)	7	1.15	putative replication protein [Escherichia coli O157:H7 str. Sakai]
|WP_041692714.1|locus|ETAC_RS03955|prediction_method|Predicted_by_at_least_one_method(IslandPath-DIMOB,SIGI-HMM)	2	1.35	ribose ABC transporter ATP-binding protein [Streptococcus agalactiae NEM316]
|WP_041692714.1|locus|ETAC_RS03955|prediction_method|Predicted_by_at_least_one_method(IslandPath-DIMOB,SIGI-HMM)	2	1.35	ribose ABC transporter ATP-binding protein [Streptococcus agalactiae NEM316]
|WP_015461419.1|locus|ETAC_RS17540|prediction_method|Predicted_by_at_least_one_method(SIGI-HMM)	7	1.37	RecName: Full=Envelope glycoprotein; Short=GP; AltName: Full=M polyprotein; Contains: RecName: Full=Glycoprotein G1; RecName: Full=Glycoprotein G2; Flags: Precursor;
|WP_071840994.1|locus|ETAC_RS18035|prediction_method|Predicted_by_at_least_one_method(IslandPath-DIMOB)	4	1.39	variant erythrocyte surface antigen-1, alpha subunit [Babesia bovis T2Bo]
|WP_015462348.1|locus|ETAC_RS14690|prediction_method|Predicted_by_at_least_one_method(IslandPath-DIMOB,SIGI-HMM)	5	1.48	RecName: Full=Peptidyl-prolyl cis-trans isomerase; EC=5.2.1.8;
|WP_015462348.1|locus|ETAC_RS14690|prediction_method|Predicted_by_at_least_one_method(IslandPath-DIMOB,SIGI-HMM)	5	1.48	RecName: Full=Peptidyl-prolyl cis-trans isomerase; EC=5.2.1.8;
|WP_015462357.1|locus|ETAC_RS14740|prediction_method|Predicted_by_at_least_one_method(IslandPath-DIMOB,SIGI-HMM)	1	1.49	RecName: Full=KEX1 protease; EC=3.4.21.-; Flags: Precursor;
|WP_015462357.1|locus|ETAC_RS14740|prediction_method|Predicted_by_at_least_one_method(IslandPath-DIMOB,SIGI-HMM)	1	1.49	RecName: Full=KEX1 protease; EC=3.4.21.-; Flags: Precursor;
|WP_071840992.1|locus|ETAC_RS17970|prediction_method|Predicted_by_at_least_one_method(IslandPath-DIMOB,SIGI-HMM)	1	1.61	hypothetical protein mll0468 [Mesorhizobium loti MAFF303099]
|WP_071840992.1|locus|ETAC_RS17970|prediction_method|Predicted_by_at_least_one_method(IslandPath-DIMOB,SIGI-HMM)	1	1.61	hypothetical protein mll0468 [Mesorhizobium loti MAFF303099]
|WP_015461416.1|locus|ETAC_RS07505|prediction_method|Predicted_by_at_least_one_method(SIGI-HMM)	5	1.74	chloramphenicol acetyltransferase [Agrobacterium tumefaciens str. C58]
|WP_041692759.1|locus|ETAC_RS09515|prediction_method|Predicted_by_at_least_one_method(SIGI-HMM,IslandPick,IslandPath-DIMOB)	10	1.77	putative inner membrane protein [Salmonella typhimurium LT2]
|WP_041692759.1|locus|ETAC_RS09515|prediction_method|Predicted_by_at_least_one_method(SIGI-HMM,IslandPick,IslandPath-DIMOB)	10	1.77	putative inner membrane protein [Salmonella typhimurium LT2]
|WP_041692759.1|locus|ETAC_RS09515|prediction_method|Predicted_by_at_least_one_method(SIGI-HMM,IslandPick,IslandPath-DIMOB)	10	1.77	putative inner membrane protein [Salmonella typhimurium LT2]
|WP_015461665.1|locus|ETAC_RS17595|prediction_method|Predicted_by_at_least_one_method(SIGI-HMM)	1	1.79	SubName: Full=Orf1a polyprotein;
|WP_015461981.1|locus|ETAC_RS11665|prediction_method|Predicted_by_at_least_one_method(IslandPath-DIMOB)	8	1.85	SubName: Full=Flagellin;
|WP_041692871.1|locus|ETAC_RS09585|prediction_method|Predicted_by_at_least_one_method(IslandPath-DIMOB,IslandPick)	2	1.89	hypothetical protein c1205 [Escherichia coli CFT073]
|WP_041692871.1|locus|ETAC_RS09585|prediction_method|Predicted_by_at_least_one_method(IslandPath-DIMOB,IslandPick)	2	1.89	hypothetical protein c1205 [Escherichia coli CFT073]
|WP_015461983.1|locus|ETAC_RS11675|prediction_method|Predicted_by_at_least_one_method(SIGI-HMM)	5	1.95	flagellar export protein
|WP_071840952.1|locus|ETAC_RS17350|prediction_method|Predicted_by_at_least_one_method(IslandPath-DIMOB,SIGI-HMM)	3	2.02	flagellum specific ATP-synthase
|WP_071840952.1|locus|ETAC_RS17350|prediction_method|Predicted_by_at_least_one_method(IslandPath-DIMOB,SIGI-HMM)	3	2.02	flagellum specific ATP-synthase
|WP_015462360.1|locus|ETAC_RS14755|prediction_method|Predicted_by_at_least_one_method(IslandPath-DIMOB,SIGI-HMM)	5	2.04	inner membrane pump protein [Pseudomonas fluorescens]
|WP_015462360.1|locus|ETAC_RS14755|prediction_method|Predicted_by_at_least_one_method(IslandPath-DIMOB,SIGI-HMM)	5	2.04	inner membrane pump protein [Pseudomonas fluorescens]
|WP_012848872.1|locus|ETAC_RS09320|prediction_method|Predicted_by_at_least_one_method(SIGI-HMM)	5	2.06	trans-sialidase [Trypanosoma cruzi strain CL Brener]
|WP_015460870.1|locus|ETAC_RS02205|prediction_method|Predicted_by_at_least_one_method(IslandPath-DIMOB)	11	2.1	beta-lactamase [Actinobacillus porcitonsillarum]
|WP_041692697.1|locus|ETAC_RS01415|prediction_method|Predicted_by_at_least_one_method(SIGI-HMM)	6	2.27	putative galactosyltransferase [Campylobacter jejuni subsp. jejuni NCTC 11168]
|WP_015462353.1|locus|ETAC_RS14715|prediction_method|Predicted_by_at_least_one_method(IslandPath-DIMOB,SIGI-HMM)	6	2.29	unknown [Shigella flexneri 2a]
|WP_015462353.1|locus|ETAC_RS14715|prediction_method|Predicted_by_at_least_one_method(IslandPath-DIMOB,SIGI-HMM)	6	2.29	unknown [Shigella flexneri 2a]
|WP_015460873.1|locus|ETAC_RS02220|prediction_method|Predicted_by_at_least_one_method(IslandPath-DIMOB)	1	2.32	RecName: Full=General secretion pathway protein G; AltName: Full=Cholera toxin secretion protein epsG; Flags: Precursor;
|WP_015462346.1|locus|ETAC_RS14680|prediction_method|Predicted_by_at_least_one_method(IslandPath-DIMOB,SIGI-HMM)	23	2.41	multidrug resistance protein MdtM [Escherichia coli HS]
|WP_015462346.1|locus|ETAC_RS14680|prediction_method|Predicted_by_at_least_one_method(IslandPath-DIMOB,SIGI-HMM)	23	2.41	multidrug resistance protein MdtM [Escherichia coli HS]
|WP_071840949.1|locus|ETAC_RS17325|prediction_method|Predicted_by_at_least_one_method(IslandPath-DIMOB)	6	2.71	putative type IV pilus protein [Yersinia enterocolitica subsp. enterocolitica 8081]
|WP_015460846.1|locus|ETAC_RS02090|prediction_method|Predicted_by_at_least_one_method(IslandPath-DIMOB)	5	2.76	RecName: Full=Acetate kinase; EC=2.7.2.1; AltName: Full=Acetokinase;
|WP_015460849.1|locus|ETAC_RS02105|prediction_method|Predicted_by_at_least_one_method(IslandPath-DIMOB)	4	2.78	ornithine carbamoyltransferase 2, chain F; CP4-6 prophage [Escherichia coli str. K-12 substr. MG1655]
|WP_015462177.1|locus|ETAC_RS13210|prediction_method|Predicted_by_at_least_one_method(IslandPath-DIMOB)	6	2.83	ISSfl3 orfA [Shigella flexneri 2a str. 2457T]
|WP_071840982.1|locus|ETAC_RS17805|prediction_method|Predicted_by_at_least_one_method(IslandPick,SIGI-HMM,IslandPath-DIMOB)	10	3.11	SubName: Full=SPV132 IFN-alpha/beta-like binding protein;
|WP_071840982.1|locus|ETAC_RS17805|prediction_method|Predicted_by_at_least_one_method(IslandPick,SIGI-HMM,IslandPath-DIMOB)	10	3.11	SubName: Full=SPV132 IFN-alpha/beta-like binding protein;
|WP_071840982.1|locus|ETAC_RS17805|prediction_method|Predicted_by_at_least_one_method(IslandPick,SIGI-HMM,IslandPath-DIMOB)	10	3.11	SubName: Full=SPV132 IFN-alpha/beta-like binding protein;
|WP_041692821.1|locus|ETAC_RS18045|prediction_method|Predicted_by_at_least_one_method(IslandPath-DIMOB,SIGI-HMM)	2	3.22	SubName: Full=Gp146R;
|WP_041692821.1|locus|ETAC_RS18045|prediction_method|Predicted_by_at_least_one_method(IslandPath-DIMOB,SIGI-HMM)	2	3.22	SubName: Full=Gp146R;
|WP_071840972.1|locus|ETAC_RS17660|prediction_method|Predicted_by_at_least_one_method(IslandPath-DIMOB)	7	3.24	aminoglycoside acetyltransferase [Escherichia coli]
|WP_015460860.1|locus|ETAC_RS02155|prediction_method|Predicted_by_at_least_one_method(IslandPath-DIMOB)	5	3.42	RecName: Full=Uncharacterized protein Rv0049/MT0055;
|WP_041692702.1|locus|ETAC_RS02065|prediction_method|Predicted_by_at_least_one_method(IslandPath-DIMOB)	6	3.52	SubName: Full=Transcriptional regulator;
|WP_071840995.1|locus|ETAC_RS18040|prediction_method|Predicted_by_at_least_one_method(IslandPath-DIMOB)	3	3.57	hypothetical protein SCO6918 [Streptomyces coelicolor A3 2 ]
|WP_015461668.1|locus|ETAC_RS09315|prediction_method|Predicted_by_at_least_one_method(SIGI-HMM)	4	3.71	AmpC [Enterobacter cancerogenus]
|WP_015462154.1|locus|ETAC_RS12990|prediction_method|Predicted_by_at_least_one_method(SIGI-HMM)	34	4.11	hypothetical protein BL1490 [Bifidobacterium longum NCC2705]
|WP_015461036.1|locus|ETAC_RS03960|prediction_method|Predicted_by_at_least_one_method(IslandPath-DIMOB)	2	4.32	RecName: Full=Integration host factor subunit beta; Short=IHF-beta;
|WP_015462350.1|locus|ETAC_RS14700|prediction_method|Predicted_by_at_least_one_method(IslandPath-DIMOB,SIGI-HMM)	6	4.54	hypothetical protein BT_2650 [Bacteroides thetaiotaomicron VPI-5482]
|WP_015462350.1|locus|ETAC_RS14700|prediction_method|Predicted_by_at_least_one_method(IslandPath-DIMOB,SIGI-HMM)	6	4.54	hypothetical protein BT_2650 [Bacteroides thetaiotaomicron VPI-5482]
|WP_015460778.1|locus|ETAC_RS01405|prediction_method|Predicted_by_at_least_one_method(SIGI-HMM)	2	4.6	putative multidrug efflux system lipoprotein
|WP_015462180.1|locus|ETAC_RS13240|prediction_method|Predicted_by_at_least_one_method(IslandPath-DIMOB)	5	4.78	SubName: Full=Atrolysin e; EC=3.4.24.44; Flags: Precursor; Fragment;
|WP_015460866.1|locus|ETAC_RS02185|prediction_method|Predicted_by_at_least_one_method(IslandPath-DIMOB)	5	4.79	collagenase with signal peptide
|WP_015461037.1|locus|ETAC_RS03965|prediction_method|Predicted_by_at_least_one_method(IslandPath-DIMOB)	1	4.84	trans-sialidase [Trypanosoma cruzi strain CL Brener]
|WP_015683391.1|locus|ETAC_RS09305|prediction_method|Predicted_by_at_least_one_method(SIGI-HMM)	3	5.49	hypothetical protein SpyM3_0962 [Streptococcus pyogenes MGAS315]
|WP_051065049.1|locus|ETAC_RS09310|prediction_method|Predicted_by_at_least_one_method(SIGI-HMM)	5	5.51	variant surface glycoprotein [Trypanosoma brucei TREU927]
|WP_015461741.1|locus|ETAC_RS09685|prediction_method|Predicted_by_at_least_one_method(IslandPath-DIMOB)|annotations|PAG	5	5.67	restriction endonuclease [Bacteroides thetaiotaomicron VPI-5482]
|WP_015462547.1|locus|ETAC_RS16600|prediction_method|Predicted_by_at_least_one_method(IslandPath-DIMOB,SIGI-HMM,IslandPick)	1	5.7	ISxac3 transposase [Xanthomonas axonopodis pv. citri str. 306]
|WP_015462547.1|locus|ETAC_RS16600|prediction_method|Predicted_by_at_least_one_method(IslandPath-DIMOB,SIGI-HMM,IslandPick)	1	5.7	ISxac3 transposase [Xanthomonas axonopodis pv. citri str. 306]
|WP_015462547.1|locus|ETAC_RS16600|prediction_method|Predicted_by_at_least_one_method(IslandPath-DIMOB,SIGI-HMM,IslandPick)	1	5.7	ISxac3 transposase [Xanthomonas axonopodis pv. citri str. 306]
|WP_071840971.1|locus|ETAC_RS17650|prediction_method|Predicted_by_at_least_one_method(IslandPath-DIMOB,IslandPick)	1	5.73	RecName: Full=Type 4 prepilin-like proteins leader peptide-processing enzyme; Includes: RecName: Full=Leader peptidase; EC=3.4.23.43; AltName: Full=Prepilin peptidase; RecName: Full=N-methyltransferase; EC=2.1.1.-;
|WP_071840971.1|locus|ETAC_RS17650|prediction_method|Predicted_by_at_least_one_method(IslandPath-DIMOB,IslandPick)	1	5.73	RecName: Full=Type 4 prepilin-like proteins leader peptide-processing enzyme; Includes: RecName: Full=Leader peptidase; EC=3.4.23.43; AltName: Full=Prepilin peptidase; RecName: Full=N-methyltransferase; EC=2.1.1.-;
|WP_041692767.1|locus|ETAC_RS09695|prediction_method|Predicted_by_at_least_one_method(IslandPath-DIMOB)	3	5.83	SubName: Full=Phosphoenolpyruvate-protein phosphotransferase; EC=2.7.3.9; SubName: Full=Putative phosphoenolpyruvate:sugar phosphotransferase system enzyme I;
|WP_015461032.1|locus|ETAC_RS03950|prediction_method|Predicted_by_at_least_one_method(IslandPath-DIMOB,SIGI-HMM)	2	5.91	multidrug efflux protein [Pseudomonas putida KT2440]
|WP_015461032.1|locus|ETAC_RS03950|prediction_method|Predicted_by_at_least_one_method(IslandPath-DIMOB,SIGI-HMM)	2	5.91	multidrug efflux protein [Pseudomonas putida KT2440]
|WP_015461985.1|locus|ETAC_RS17790|prediction_method|Predicted_by_at_least_one_method(SIGI-HMM)	2	6.1	RecName: Full=Protein E7;
|WP_015460859.1|locus|ETAC_RS02150|prediction_method|Predicted_by_at_least_one_method(IslandPath-DIMOB)	3	6.39	SubName: Full=Phosphoenolpyruvate-protein phosphotransferase;
|WP_015460865.1|locus|ETAC_RS02180|prediction_method|Predicted_by_at_least_one_method(IslandPath-DIMOB)	1	7.67	multidrug resistance protein MdtH [Citrobacter koseri ATCC BAA-895]
|WP_000708685.1|locus|ETAC_RS17975|prediction_method|Predicted_by_at_least_one_method(IslandPath-DIMOB,SIGI-HMM)	7	7.8	Bcs1 [Haemophilus influenzae]
|WP_000708685.1|locus|ETAC_RS17975|prediction_method|Predicted_by_at_least_one_method(IslandPath-DIMOB,SIGI-HMM)	7	7.8	Bcs1 [Haemophilus influenzae]
|WP_015461708.1|locus|ETAC_RS17645|prediction_method|Predicted_by_at_least_one_method(SIGI-HMM,IslandPath-DIMOB)	1	8.67	hypothetical protein ECs5246 [Escherichia coli O157:H7 str. Sakai]
|WP_015461708.1|locus|ETAC_RS17645|prediction_method|Predicted_by_at_least_one_method(SIGI-HMM,IslandPath-DIMOB)	1	8.67	hypothetical protein ECs5246 [Escherichia coli O157:H7 str. Sakai]
|WP_012848874.1|locus|ETAC_RS09325|prediction_method|Predicted_by_at_least_one_method(SIGI-HMM)	1	8.78	hypothetical protein BH3543 [Bacillus halodurans C-125]
|WP_015461706.1|locus|ETAC_RS09520|prediction_method|Predicted_by_at_least_one_method(SIGI-HMM,IslandPick,IslandPath-DIMOB)	1	8.82	RecName: Full=Furin-like protease 1, isoforms 1/1-X/2; Short=Furin-1; EC=3.4.21.75; AltName: Full=Kex2-like endoprotease 1; AltName: Full=dKLIP-1; Flags: Precursor;
|WP_015461706.1|locus|ETAC_RS09520|prediction_method|Predicted_by_at_least_one_method(SIGI-HMM,IslandPick,IslandPath-DIMOB)	1	8.82	RecName: Full=Furin-like protease 1, isoforms 1/1-X/2; Short=Furin-1; EC=3.4.21.75; AltName: Full=Kex2-like endoprotease 1; AltName: Full=dKLIP-1; Flags: Precursor;
|WP_015461706.1|locus|ETAC_RS09520|prediction_method|Predicted_by_at_least_one_method(SIGI-HMM,IslandPick,IslandPath-DIMOB)	1	8.82	RecName: Full=Furin-like protease 1, isoforms 1/1-X/2; Short=Furin-1; EC=3.4.21.75; AltName: Full=Kex2-like endoprotease 1; AltName: Full=dKLIP-1; Flags: Precursor;
|WP_015462344.1|locus|ETAC_RS14670|prediction_method|Predicted_by_at_least_one_method(IslandPath-DIMOB)	1	9.49	SubName: Full=Possible type III secretion protein EscC/SpiA, outer membrane pore;
|WP_015461726.1|locus|ETAC_RS09620|prediction_method|Predicted_by_at_least_one_method(IslandPath-DIMOB)	2	9.85	trwK protein [Bartonella henselae str. Houston-1]
|WP_015461716.1|locus|ETAC_RS09565|prediction_method|Predicted_by_at_least_one_method(SIGI-HMM,IslandPath-DIMOB,IslandPick)	0		not available
|WP_015461716.1|locus|ETAC_RS09565|prediction_method|Predicted_by_at_least_one_method(SIGI-HMM,IslandPath-DIMOB,IslandPick)	0		not available
|WP_015461982.1|locus|ETAC_RS11670|prediction_method|Predicted_by_at_least_one_method(SIGI-HMM)	0		not available
|WP_015461987.1|locus|ETAC_RS11695|prediction_method|Predicted_by_at_least_one_method(SIGI-HMM)	0		not available
|WP_015462015.1|locus|ETAC_RS11830|prediction_method|Predicted_by_at_least_one_method(IslandPick,SIGI-HMM,IslandPath-DIMOB)	0		not available
|WP_015462015.1|locus|ETAC_RS11830|prediction_method|Predicted_by_at_least_one_method(IslandPick,SIGI-HMM,IslandPath-DIMOB)	0		not available
|WP_015462015.1|locus|ETAC_RS11830|prediction_method|Predicted_by_at_least_one_method(IslandPick,SIGI-HMM,IslandPath-DIMOB)	0		not available
|WP_071840987.1|locus|ETAC_RS17890|prediction_method|Predicted_by_at_least_one_method(SIGI-HMM)	0		not available
|WP_012849568.1|locus|ETAC_RS13235|prediction_method|Predicted_by_at_least_one_method(IslandPath-DIMOB)	0		not available
|WP_015462341.1|locus|ETAC_RS14655|prediction_method|Predicted_by_at_least_one_method(IslandPath-DIMOB)	0		not available
|WP_000931689.1|locus|ETAC_RS14720|prediction_method|Predicted_by_at_least_one_method(IslandPath-DIMOB,SIGI-HMM)	0		not available
|WP_071840991.1|locus|ETAC_RS17965|prediction_method|Predicted_by_at_least_one_method(IslandPath-DIMOB,SIGI-HMM)	0		not available
|WP_000931689.1|locus|ETAC_RS14720|prediction_method|Predicted_by_at_least_one_method(IslandPath-DIMOB,SIGI-HMM)	0		not available
|WP_071840991.1|locus|ETAC_RS17965|prediction_method|Predicted_by_at_least_one_method(IslandPath-DIMOB,SIGI-HMM)	0		not available
|WP_015462549.1|locus|ETAC_RS16610|prediction_method|Predicted_by_at_least_one_method(IslandPath-DIMOB,SIGI-HMM,IslandPick)	0		not available
|WP_015462549.1|locus|ETAC_RS16610|prediction_method|Predicted_by_at_least_one_method(IslandPath-DIMOB,SIGI-HMM,IslandPick)	0		not available
|WP_015462549.1|locus|ETAC_RS16610|prediction_method|Predicted_by_at_least_one_method(IslandPath-DIMOB,SIGI-HMM,IslandPick)	0		not available
|WP_015460861.1|locus|ETAC_RS02160|prediction_method|Predicted_by_at_least_one_method(IslandPath-DIMOB)	0		not available
|WP_015460863.1|locus|ETAC_RS02170|prediction_method|Predicted_by_at_least_one_method(IslandPath-DIMOB)	0		not available
|WP_015461223.1|locus|ETAC_RS05730|prediction_method|Predicted_by_at_least_one_method(SIGI-HMM)	0		not available
|WP_015461716.1|locus|ETAC_RS09565|prediction_method|Predicted_by_at_least_one_method(SIGI-HMM,IslandPath-DIMOB,IslandPick)	0		not available
